# Supplementary material for: Accidental triplet harvesting in donor–acceptor dyads with low spin–orbit coupling
Source: Royal Society of Chemistry journal article supplement (doi:10.1039/d3cp04904c), 2024-01-01
Supplement: d3cp04904c1.pdf [file d3cp04904c1.pdf]

# Accidental Triplet Harvesting in Donor-acceptor Dyads with Low Spin-orbit Coupling<sup>†</sup>

Pijush Karak, Torsha Moitra, Ambar Banerjee\*, Kenneth Ruud\*, Swapan Chakrabarti\*

email: ambar.banerjee@physics.uu.se, kenneth.ruud@uit.no, swcchem@caluniv.ac.in

## Contents

|     |                                                                                                                                                                                                                                               |     |
|-----|-----------------------------------------------------------------------------------------------------------------------------------------------------------------------------------------------------------------------------------------------|-----|
| S1  | Explicit solvent optimized ground state geometry of molecule 1                                                                                                                                                                                | S2  |
| S2  | CASSCF converged active orbitals of molecule 1                                                                                                                                                                                                | S2  |
| S3  | Computation of excitation energies, absorption wavelengths, ordering and nature of the states performed on both B3LYP and CAM-B3LYP optimized ground and first excited singlet state geometries in TD-DFT,STEOM-DLPNO-CCSD and NEVPT2 methods | S3  |
| S4  | Analysis of Charge-transfer number of all the studied molecules                                                                                                                                                                               | S4  |
| S5  | IC rate constants between $S_{CT-Phen}$ and $S_{CT-Naph}$ at various dihedral angles of molecule 1.                                                                                                                                           | S7  |
| S6  | ISC and IC mechanisms of molecule 2                                                                                                                                                                                                           | S7  |
| S7  | ISC mechanisms of molecule 3 and 4                                                                                                                                                                                                            | S10 |
| S8  | Discussion about the Duschinsky rotation matrix (J) and displacement vector (D)                                                                                                                                                               | S14 |
| S9  | $k_{ISC}^{DSO}$ values at 300K for all three pathways of molecules 1 and 2 with or without incorporating the effect of Duschinsky rotation matrix (J) and displacement vector (D) at different dihedral angles                                | S15 |
| S10 | Effect of basis set on the spin-orbit coupling matrix elements                                                                                                                                                                                | S18 |
| S11 | Effect of solvent polarity on the energetic ordering of the excited states                                                                                                                                                                    | S18 |
| S12 | Nature of the mode-specific NACMEs                                                                                                                                                                                                            | S20 |
| S13 | Frequencies of all geometries of molecule 1 computed at (B3LYP/6-311G(d,p)) level of theory                                                                                                                                                   | S23 |
| S14 | Frequencies of all geometries of molecule 2 computed at (B3LYP/6-311G(d,p)) level of theory                                                                                                                                                   | S33 |
| S15 | Coordinates of the optimized geometries of molecule 1                                                                                                                                                                                         | S40 |
| S16 | Coordinates of the optimized geometries of molecule 2                                                                                                                                                                                         | S46 |
| S17 | Coordinates of the optimized geometries of molecule 3                                                                                                                                                                                         | S56 |
| S18 | Coordinates of the optimized geometries of molecule 4                                                                                                                                                                                         | S62 |
| S19 | Coordinates of the optimized geometries of molecule 5                                                                                                                                                                                         | S69 |
| S20 | Frequencies of all geometries of molecule 5 computed at (B3LYP/6-311G(d,p)) level of theory                                                                                                                                                   | S75 |

## S1 Explicit solvent optimized ground state geometry of molecule 1

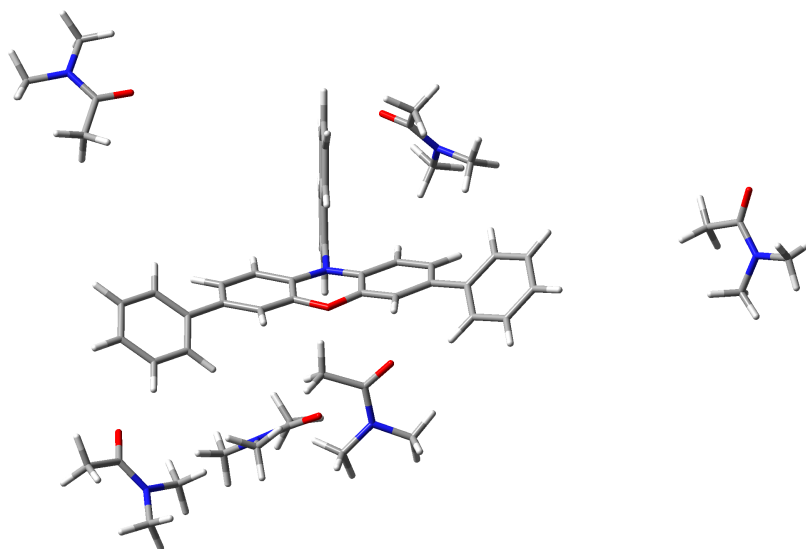

Fig S1. Optimized geometry of molecule 1 in presence of explicit DMAc solvent molecules.

## S2 CASSCF converged active orbitals of molecule 1

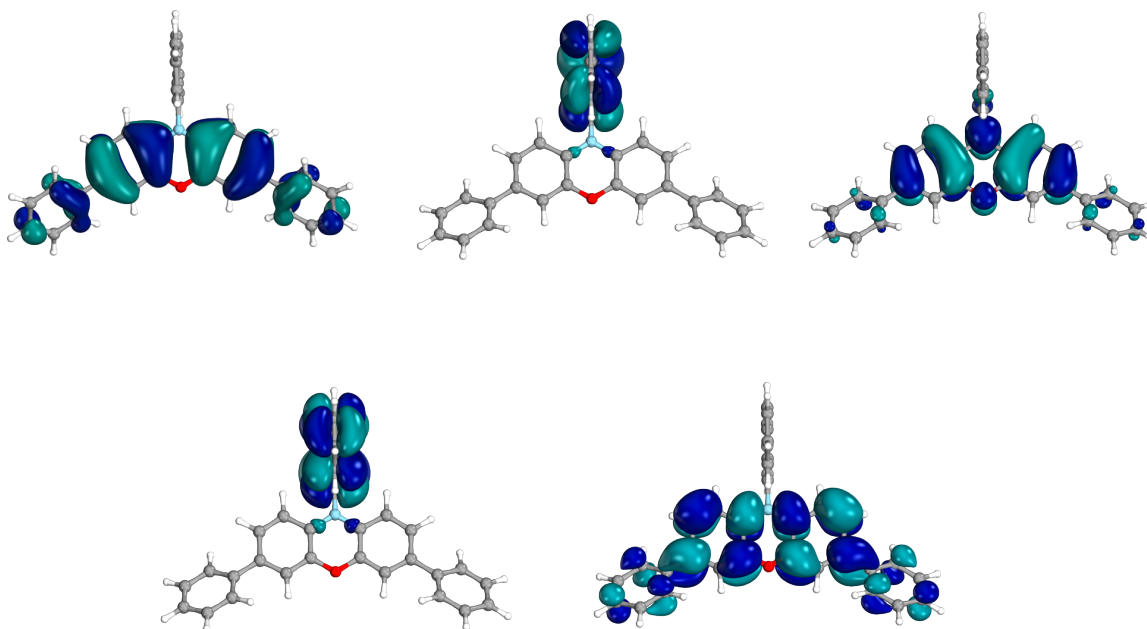

Fig S2. The state averaged (SA) CASSCF converged active orbitals are obtained by using an active space composed of six electrons distributed in 5 orbitals. 9 triplet and 10 singlet states are included in this state averaged CASSCF calculation.

### S3 Computation of excitation energies, absorption wavelengths, ordering and nature of the states performed on both B3LYP and CAM-B3LYP optimized ground and first excited singlet state geometries in TD-DFT,STEOM-DLPNO-CCSD and NEVPT2(6e,5o) methods

#### TD-DFT

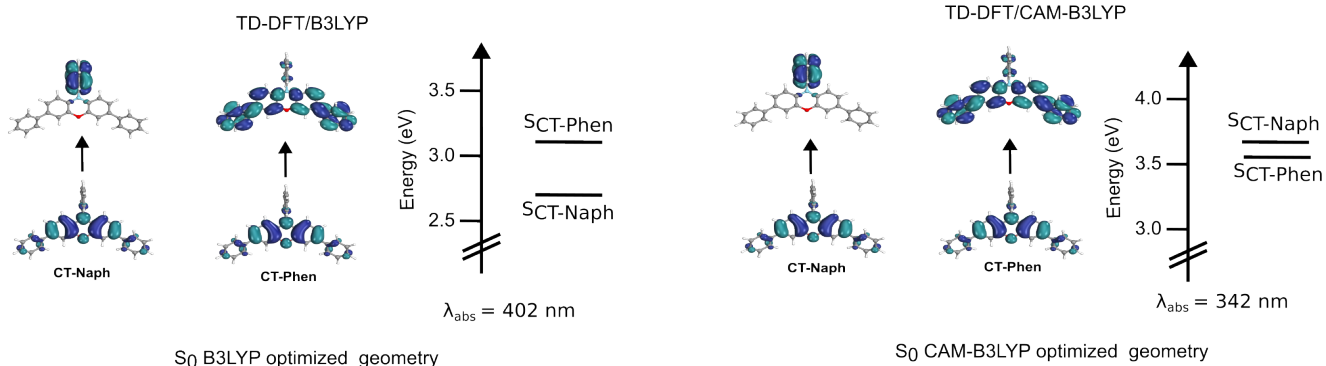

#### STEOM-DLPNO-CCSD

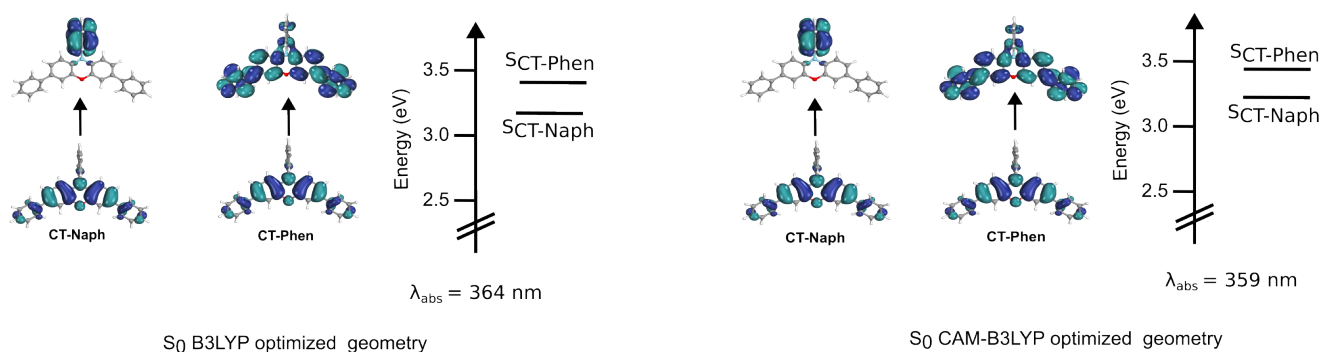

#### NEVPT2(6e,5o)

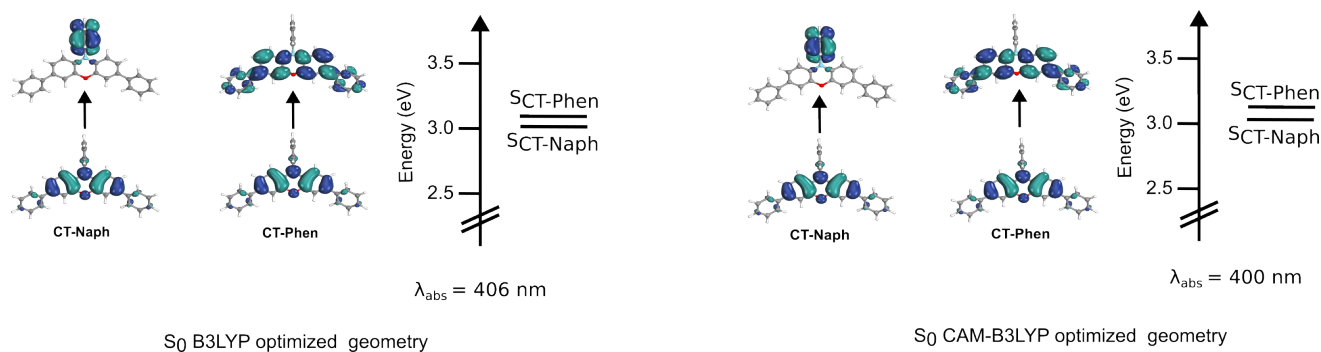

**Fig S3.** Excitation energies, absorption wavelengths, ordering and nature of the state in three different methods using both B3LYP and CAM-B3LYP optimized ground state geometries of molecule **1**.

## TD-DFT

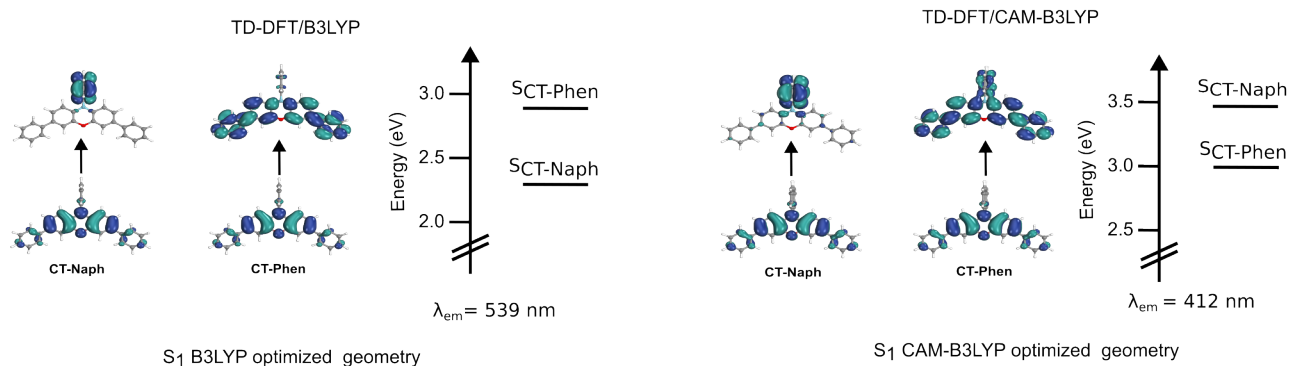

## STEOM-DLPNO-CCSD

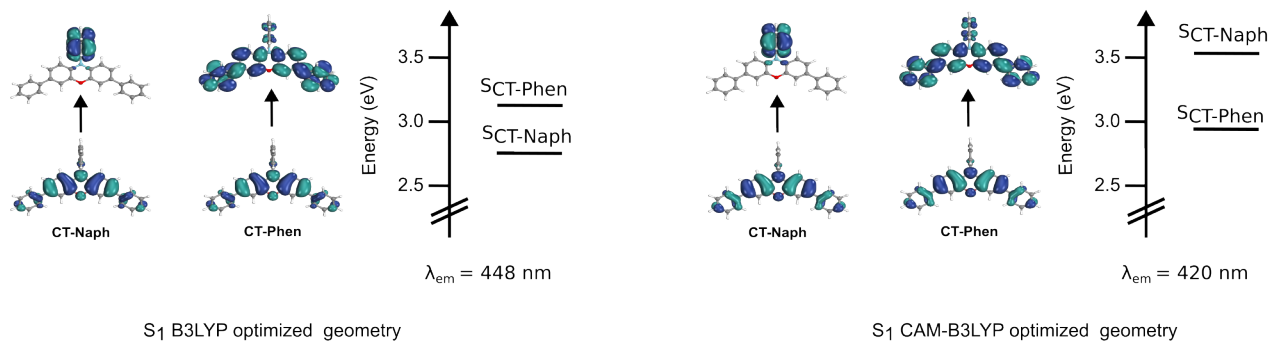

## NEVPT2(6e,5o)

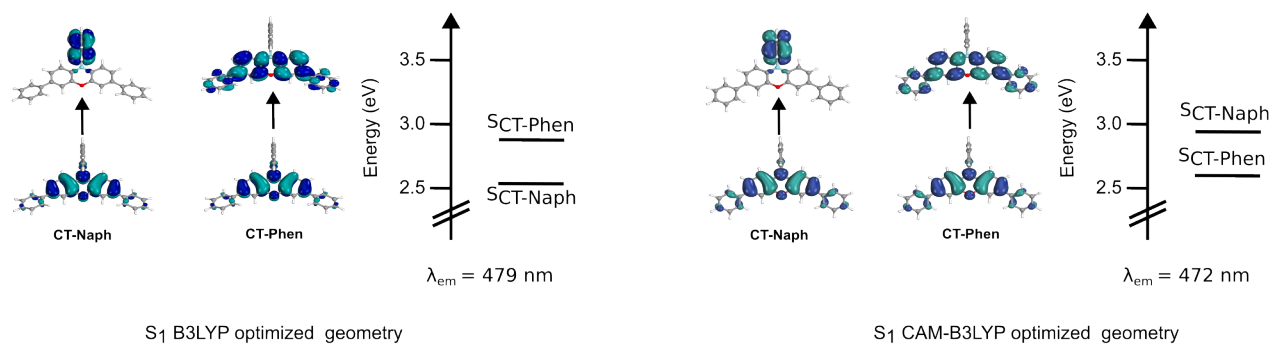

**Fig S4.** Excitation energies, absorption wavelengths, ordering and nature of the state in three different methods using both B3LYP and CAM-B3LYP optimized first excited singlet state geometries of molecule 1.

## S4 Analysis of Charge-transfer number of all the studied molecules

**Table S1.** Charge Transfer (CT) values of excited singlet and triplet electronic states of all the studied molecules at their equilibrium geometries.

| state of molecule 1   | CT    | state of molecule 2   | CT    | state of molecule 3   | CT    | state of molecule 4   | CT    |
|-----------------------|-------|-----------------------|-------|-----------------------|-------|-----------------------|-------|
| S <sub>CT</sub> -Naph | 0.931 | S <sub>CT</sub> -Naph | 0.951 | S <sub>CT</sub> -Naph | 0.954 | S <sub>CT</sub> -Naph | 0.957 |
| S <sub>CT</sub> -Phen | 0.391 | S <sub>CT</sub> -Biph | 0.477 | S <sub>CT</sub> -Phen | 0.293 | S <sub>CT</sub> -Phen | 0.300 |
| T <sub>CT</sub> -Phen | 0.393 | T <sub>CT</sub> -Biph | 0.318 | T <sub>CT</sub> -Phen | 0.223 | T <sub>CT</sub> -Phen | 0.256 |
| T <sub>CT</sub> -Naph | 0.820 | T <sub>CT</sub> -Naph | 0.941 | T <sub>CT</sub> -Naph | 0.947 | T <sub>CT</sub> -Naph | 0.886 |
| T <sub>LE</sub> -Naph | 0.052 | T <sub>LE</sub> -Naph | 0.041 | T <sub>LE</sub> -Naph | 0.041 | T <sub>LE</sub> -Naph | 0.068 |

To quantify the nature of the transition associated with the singlet and triplet excited electronic states, we

have performed a charge transfer (CT) analysis of all the molecules studied using TheoDore.<sup>1</sup> The computed CT values of each of the electronic states are given in Table S1. CT numbers greater than 0.8 for a particular state suggests that the state is associated with a strong charge-transfer character. From Table S1, it is evident that for molecule **1**, the CT number of  $S_{CT-Naph}$  is 0.93 and in the other three molecules, the CT number for this state is 0.95. For the  $S_{CT-Phen}$  state, the CT numbers have been found to be 0.39, 0.47, 0.29 and 0.30 in molecules **1**, **2**, **3** and **4**, respectively. Therefore,  $S_{CT-Naph}$  and  $S_{CT-Phen}$  are strong and weak charge transfer states, respectively. The same is true for the  $T_{CT-Naph}$  and  $T_{CT-Phen}$  states. On the other hand, the  $T_{LE-Naph}$  state, with a very small CT value of less than 0.1, is denoted as the locally excitation (LE) state.

To understand the trend of variation of the CT and LE characters with the decrease in D-A dihedral angle from 90°, we have performed CT analysis at an interval of 4° dihedral angle up to 60° using TheoDore software. The computed CT number of molecule **1** are given in Table S2. With the decrease in D-A dihedral angle the CT number of  $S_{CT-Naph}$  and  $T_{CT-Naph}$  states are gradually decreased from 0.931 and 0.820 to 0.854 and 0.375, respectively. The diminishing rate of the CT number with dihedral angle is much more faster for  $T_{CT-Naph}$  compared to  $S_{CT-Naph}$ . On the other hand, the reverse trend has been noticed for  $S_{CT-Phen}$  and  $T_{CT-Phen}$ . The CT number of  $S_{CT-Phen}$  and  $T_{CT-Phen}$  vary from 0.391 to 0.407 and 0.391 to 0.489 respectively. The increasing nature of the CT values has also been seen in  $T_{LE-Naph}$  state in the range of 0.052 to 0.303 with the decrease in dihedral angle. In addition, we have also performed hole and electron distribution of the excited singlet and

**Table S2.** Charge Transfer (CT) values of excited singlet and triplet electronic states of molecule **1** at different dihedral angle.

| dihedral angle | CT of state $S_{CT-Naph}$ | CT of state $T_{CT-Naph}$ | CT of state $S_{CT-Phen}$ | CT of state $T_{CT-Phen}$ | CT of state $T_{LE-Naph}$ |
|----------------|---------------------------|---------------------------|---------------------------|---------------------------|---------------------------|
| 90.2           | 0.931                     | 0.820                     | 0.391                     | 0.391                     | 0.052                     |
| 88             | 0.930                     | 0.699                     | 0.391                     | 0.387                     | 0.167                     |
| 84             | 0.927                     | 0.561                     | 0.391                     | 0.412                     | 0.267                     |
| 80             | 0.920                     | 0.505                     | 0.390                     | 0.442                     | 0.284                     |
| 76             | 0.911                     | 0.469                     | 0.394                     | 0.461                     | 0.290                     |
| 72             | 0.899                     | 0.439                     | 0.396                     | 0.473                     | 0.294                     |
| 68             | 0.886                     | 0.414                     | 0.399                     | 0.481                     | 0.297                     |
| 64             | 0.871                     | 0.393                     | 0.401                     | 0.486                     | 0.300                     |
| 60             | 0.854                     | 0.375                     | 0.407                     | 0.489                     | 0.303                     |

triplet states in order to quantify the nature of these states (CT or LE) using Multiwfn software.<sup>2,3</sup> The pictorial representation of the distribution of the hole and electron of the excited singlet and triplet states are given in Fig S5. From this figure, it is clear that the hole and electron are distinctly located on two different moieties namely, phenoxazine and naphthyl respectively, indicating a strong charge-transfer character for the  $S/T_{CT-naph}$  state. On the other hand, in case of  $T_{LE-Naph}$  state, the hole and electron are localized on the same naphthyl part, indicating the locally-exciton (LE) type transition. The separation between hole and electron distribution of the  $S/T_{CT-Phen}$  state is small which in turn implies a weak CT state. The values of  $D$  and  $S_r$  indices associated with the singlet and triplet excited states are collected in Table S3 and the results are generated from Multiwfn software. A strong CT state is defined by a large and small values of  $D$  and  $S_r$  indices, respectively, and the reverse is true for the LE state.

**Table S3.** The values of  $D$  and  $S_r$  indices for the excited singlet and the triplet electronic states of molecule **1** as obtained from Multiwfn software.

| Transition                    | $D$ () | $S_r$ |
|-------------------------------|--------|-------|
| $S_0 \rightarrow S_{CT-Naph}$ | 4.15   | 0.15  |
| $S_0 \rightarrow S_{CT-Phen}$ | 0.14   | 0.68  |
| $S_0 \rightarrow T_{CT-Naph}$ | 2.53   | 0.51  |
| $S_0 \rightarrow T_{LE-Naph}$ | 0.08   | 0.92  |
| $S_0 \rightarrow T_{CT-Phen}$ | 1.23   | 0.67  |

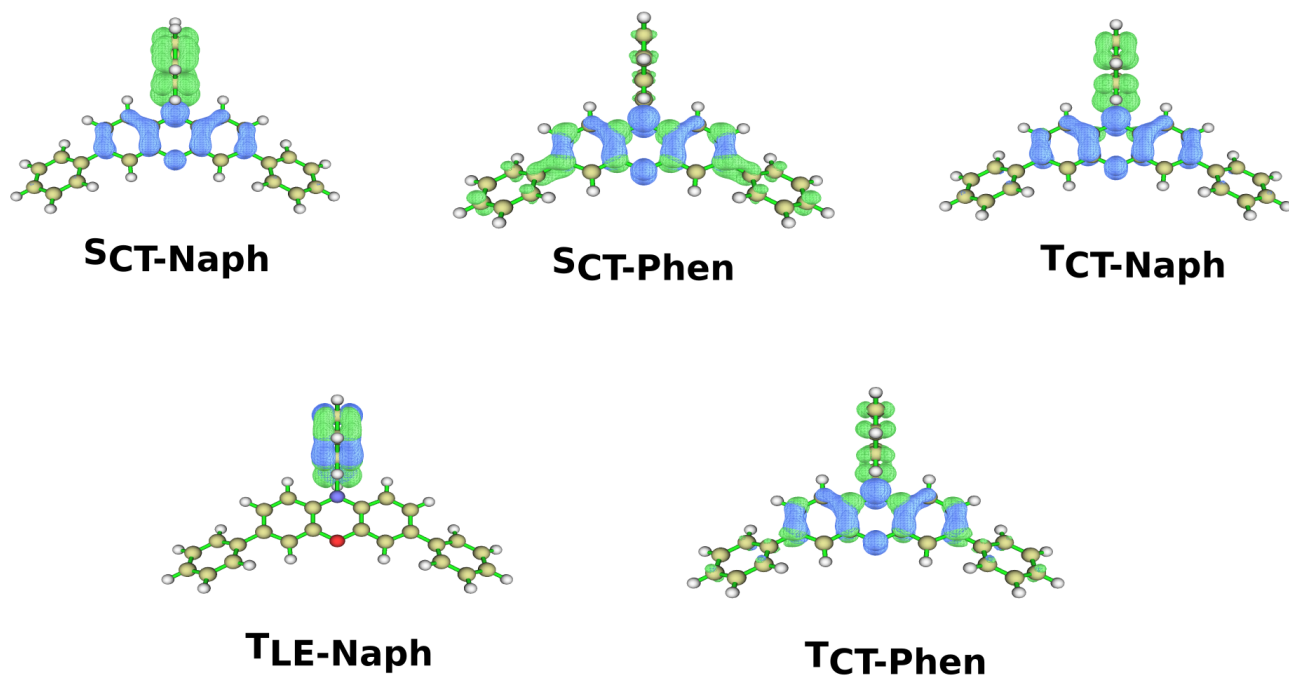

**Fig S5.** Hole and electron distributions of the excited singlet and triplet states of molecule **1** computed at the TD-DFT (B3LYP/6-311G(d,p)) level of theory using Multiwfn software. The blue and green color indicates the hole and electron distributions respectively.

## S5 IC rate constants between $S_{CT-Phen}$ and $S_{CT-Naph}$ at various dihedral angles of molecule 1.

**Table S4.**  $k_{IC}$  at 300K in  $s^{-1}$  of  $S_{CT-Phen} \rightsquigarrow S_{CT-Naph}$  channel and  $\Delta E$  and norm of NAC vector between  $S_{CT-Phen}$  and  $S_{CT-Naph}$  in eV and bohr $^{-1}$ .

| Dihedral angle | $\Delta E$ | norm of NAC | $k_{IC}$              |
|----------------|------------|-------------|-----------------------|
| 90.2           | 0.26       | 2.89        | $0.52 \times 10^{11}$ |
| 88             | 0.27       | 2.91        | $0.69 \times 10^{11}$ |
| 84             | 0.27       | 3.48        | $0.95 \times 10^{11}$ |
| 80             | 0.28       | 1.95        | $0.21 \times 10^{11}$ |
| 76             | 0.29       | 4.88        | $1.15 \times 10^{11}$ |
| 72             | 0.31       | 6.97        | $4.23 \times 10^{11}$ |
| 68             | 0.33       | 6.08        | $0.88 \times 10^{11}$ |
| 64             | 0.35       | 4.18        | $0.64 \times 10^{11}$ |
| 60             | 0.38       | 31.43       | $4.30 \times 10^{12}$ |

**Table S5.** SV-induced  $k_{ISC}$  of  $S_{CT-Naph} \rightsquigarrow T_{CT-Phen}$  of molecule 1

| dihedral angle | $\Delta E$ (eV) | norm of NAC (bohr $^{-1}$ ) | $k_{ISC}^{SV}$ ( $s^{-1}$ ) |
|----------------|-----------------|-----------------------------|-----------------------------|
| 68             | 0.12            | 14.63                       | $4.32 \times 10^5$          |
| 64             | 0.06            | 31.76                       | $2.67 \times 10^7$          |

It should be mentioned here that the vibronic correction to the SOC or Herzberg-Teller contribution in the determination of ISC rate is a suitable approach for the  $S_{CT-Naph} \rightsquigarrow T_{CT-Naph}$  pathway since direct-SOC between them is very small. In this context, following C. Marian's method,<sup>4</sup> we already have developed a code<sup>5</sup> and computed the HT contribution towards  $k_{ISC}$  for the  $S_{CT-Naph} \rightsquigarrow T_{CT-Naph}$  channel and the value of the corresponding rate constant is  $4.49 \times 10^5 s^{-1}$  at equilibrium dihedral angle. In this case, the derivative SOC is computed for the normal mode, where the rotational motion of the naphthyl moiety across the C-N sigma bond is present. The calculated same ISC rate constant at dihedral angle of  $72^\circ$  has been found to be  $3.18 \times 10^7 s^{-1}$ , indicating that the HT contribution is unable to meet the experimental rate constant value. It is also worth mentioning that we didn't compute the HT contribution for all the normal modes and we believe that such calculations are a bit difficult for a molecule having 171 normal modes.

## S6 ISC and IC mechanisms of molecule 2

The only difference between molecules **1** and **2** is that the phenyl group attached to the phenoxazine moiety in molecule **1** is replaced by the biphenyl group in molecule **2**. The structure of molecule **2** is given in Fig S6a. The bright state of molecule **2** has  $S_{CT-Biph}$  character, which is similar to the  $S_{CT-Phen}$  state of **1**. The nature of the other excited states, namely ( $S_{CT-Naph}$ ,  $T_{CT-Biph}$ ,  $T_{CT-Naph}$  and  $T_{LE-Naph}$ ) are exactly identical to the corresponding states of molecule **1**. Similar to molecule **1**, the effect of rotation around the N-C sigma bond on the energy levels and characters of the various singlet and triplet states have been investigated for **2** and the rotation axis is depicted in Fig S6. The range of variation of the dihedral angle has been kept the same as that considered for **1**.

The nature of the CASSCF orbitals as evident from Fig S6b reveals that with the decrease in dihedral angle, the pure CT and LE states at the equilibrium geometry gain some LE and CT character, respectively. Due to orbital mixing during free rotation, the SOC among the CT-LE states start to decrease, while an opposite behavior is observed for CT-CT states and the calculated SOC values are given in Table S6. Almost similar variation of the energies of both the singlet and the triplet excited states of molecule **2** has been found as for molecule **1**. The only difference is that in molecule **2**,  $T_{LE-Naph}$  and  $T_{CT-Biph}$  states are located 0.03 and 0.07 eV above and below the  $S_{CT-Naph}$  state at  $60^\circ$  whereas both the LE and the CT triplet states have placed themselves 0.004 eV lower and higher in energy with respect to  $S_{CT-Naph}$ , respectively. Nevertheless, all these states are energetically very close to each other in both molecules. The potential energy surfaces of the relevant singlet

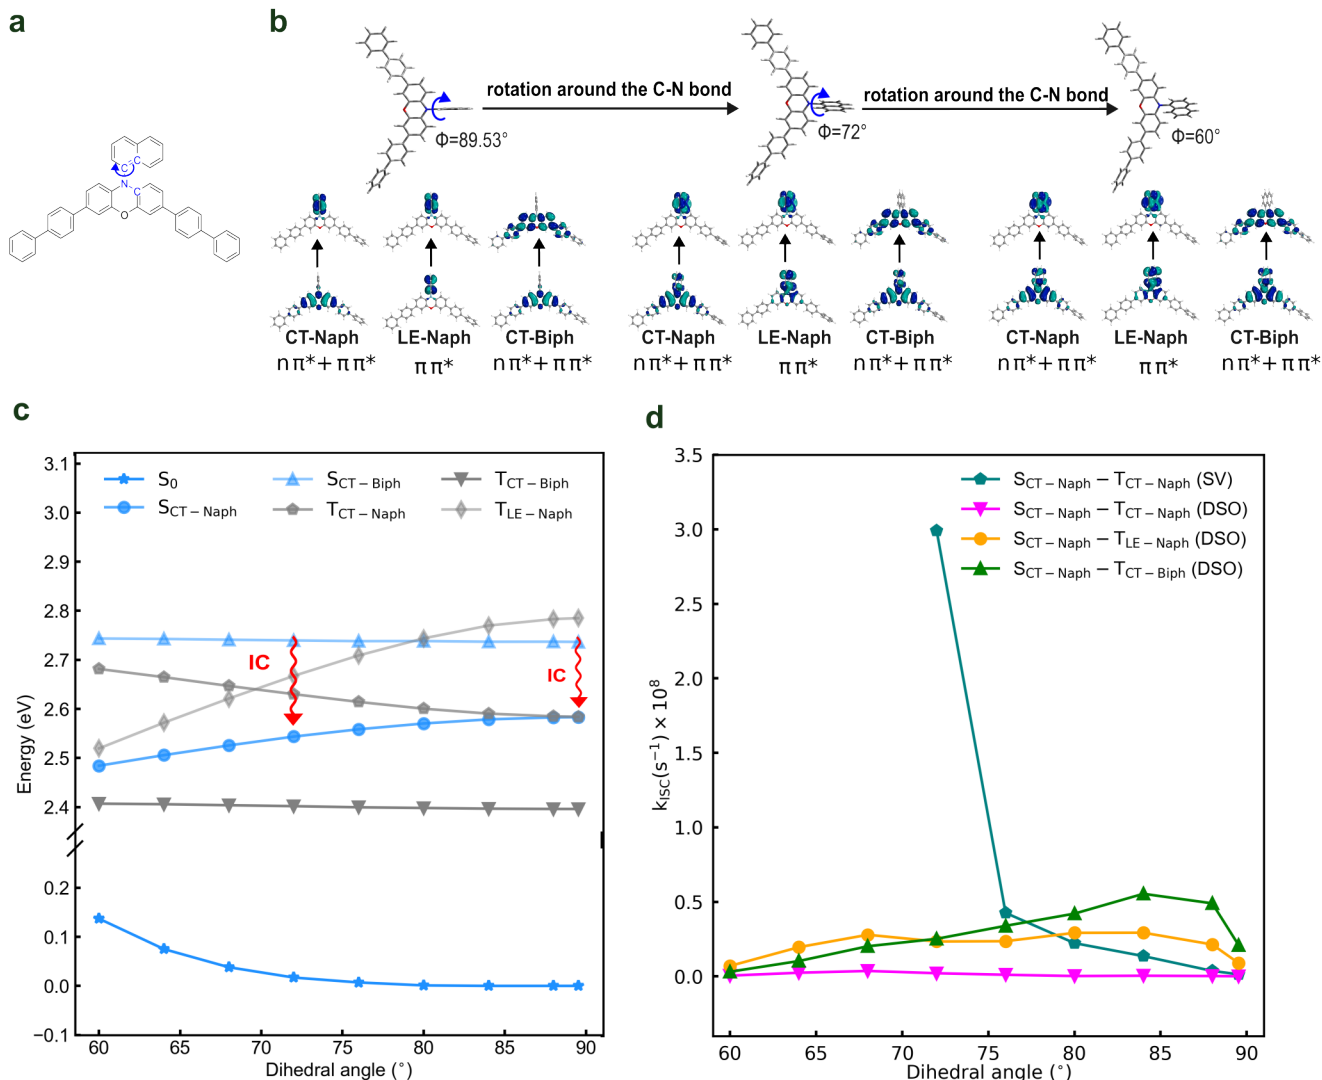

**Fig S6.** (a) Structure of the photoredox molecule **2** and the rotation along the C-N bond involving the dihedral angle of the C-C-N-C atoms in blue color. (b) Nature of the CAS-SCF orbitals involved in generation of the CT-Naph, CT-Biph and LE-Naph states and their orbital mixing with decrease in dihedral angle. (c) Potential energy surfaces of CT-Naph, CT-Biph and LE-Naph singlets and triplets states generated due to free rotation around the sigma bond. (d) Nature of variation of  $k_{ISC}$  for both DSO and SV mechanisms.

and triplets states with the variation of the selected dihedral angle are depicted in Fig S6c.

In molecule **2**, the possible ISC channels are the (a)  $S_{CT-Naph} \rightsquigarrow T_{CT-Biph}$ , (b)  $S_{CT-Naph} \rightsquigarrow T_{LE-Naph}$  and (c)  $S_{CT-Naph} \rightsquigarrow T_{CT-Naph}$ . The maximum  $k_{ISC}$  achieved with direct-SOC for (a), (b) and (c) pathways are  $5.54 \times 10^7$ ,  $2.93 \times 10^7$  and  $3.63 \times 10^6$   $s^{-1}$  at a dihedral angle  $84^\circ$ ,  $84^\circ$  and  $68^\circ$ , respectively and can be found in Table S6.

It is to be noted that the largest DSO-aided  $k_{ISC}$  value is still lower than the experimentally observed ISC rate constant<sup>6</sup> ( $1.69 \times 10^8$   $s^{-1}$ ), indicating that the DSO only ISC mechanism is not the proper route for triplet harvesting. In this case too, the inclusion of the spin-vibronic (SV) contribution to  $k_{ISC}$  in the  $S_{CT-Naph} \rightsquigarrow T_{CT-Naph}$  channel helps reach a  $k_{ISC}$  value of  $2.99 \times 10^8$   $s^{-1}$ , which is in good agreement with the experimental findings. The variation of DSO and SV induced  $k_{ISC}$  with dihedral angle are depicted in Fig S6d and it is seen that at  $72^\circ$ , the SV-ISC rate constant in channel (c) outweighs the DSO aided  $k_{ISC}$  obtained in all of the (a), (b) and (c) pathways. The computed SV promoted  $k_{ISC}$  for the  $S_{CT-Naph} \rightsquigarrow T_{CT-Naph}$  pathway up to  $\sim 72^\circ$  is presented in Table S7. Earlier, it was found that free rotation induced reorganization of the various triplet states of molecule **2**<sup>7</sup> may lead to an increase of SOC from  $0.85$   $cm^{-1}$  between  $S_{CT-Naph}$  and  $T_{CT-Biph}$  to  $1.46$   $cm^{-1}$  between  $S_{CT-Naph}$  and  $T_{LE-Naph}$ , indicating that SOC alone only can increase the rate constant of ISC between  $S_{CT-Naph}$  and  $T_{LE-Naph}$  by a factor of three compared to that between  $S_{CT-Naph}$  and  $T_{CT-Biph}$ .



**Table S6.** Direct SOC induced  $k_{ISC}$  at 300K, energy gap and the magnitude of the spin-orbit coupling at different dihedral angles of molecule **2**. Here, a, b and c represent  $S_{CT-Naph} \rightsquigarrow T_{CT-Biph}$ ,  $S_{CT-Naph} \rightsquigarrow T_{LE-Naph}$  and  $S_{CT-Naph} \rightsquigarrow T_{CT-Naph}$  transitions, respectively. The unit of  $k_{ISC}$ ,  $\Delta E$  and SOC are  $s^{-1}$ , eV and  $cm^{-1}$ , respectively.

| Dihedral -angle | $\Delta E^a$ | SOC <sup>a</sup> | $k_{ISC}^a$        | $\Delta E^b$ | SOC <sup>b</sup> | $k_{ISC}^b$        | $\Delta E^c$ | SOC <sup>c</sup> | $k_{ISC}^c$        |
|-----------------|--------------|------------------|--------------------|--------------|------------------|--------------------|--------------|------------------|--------------------|
| 89.53           | 0.18         | 0.87             | $2.10 \times 10^7$ | -0.20        | 1.57             | $8.90 \times 10^6$ | -0.0007      | 0.07             | $6.35 \times 10^4$ |
| 88              | 0.18         | 0.88             | $4.90 \times 10^7$ | -0.19        | 1.57             | $2.14 \times 10^7$ | -0.002       | 0.08             | $2.22 \times 10^5$ |
| 84              | 0.18         | 0.94             | $5.54 \times 10^7$ | -0.19        | 1.55             | $2.93 \times 10^7$ | -0.01        | 0.13             | $4.20 \times 10^5$ |
| 80              | 0.17         | 1.03             | $4.21 \times 10^7$ | -0.17        | 1.53             | $2.92 \times 10^7$ | -0.03        | 0.23             | $2.22 \times 10^5$ |
| 76              | 0.16         | 1.02             | $3.39 \times 10^7$ | -0.15        | 1.50             | $2.36 \times 10^7$ | -0.05        | 0.33             | $1.06 \times 10^6$ |
| 72              | 0.14         | 1.15             | $2.52 \times 10^6$ | -0.12        | 1.47             | $2.34 \times 10^7$ | -0.08        | 0.41             | $2.10 \times 10^6$ |
| 68              | 0.12         | 1.19             | $2.02 \times 10^6$ | -0.09        | 1.43             | $2.79 \times 10^7$ | -0.12        | 0.48             | $3.63 \times 10^6$ |
| 64              | 0.10         | 1.21             | $1.03 \times 10^6$ | -0.06        | 1.38             | $1.96 \times 10^7$ | -0.15        | 0.51             | $2.43 \times 10^6$ |
| 60              | 0.07         | 1.22             | $3.12 \times 10^6$ | -0.03        | 1.34             | $7.03 \times 10^6$ | -0.19        | 0.57             | $4.93 \times 10^5$ |

**Table S7.** Spin-vibronic coupling driven  $k_{ISC}$  at 300K in  $s^{-1}$  of  $S_{CT-Naph} \rightsquigarrow T_{CT-Naph}$  and  $\Delta E$  and NAC between  $T_{LE-Naph}$  and  $T_{CT-Naph}$  in eV and bohr<sup>-1</sup> respectively.

| Dihedral angle | $\Delta E$ | norm of NAC | $k_{ISC}^{SV}$     |
|----------------|------------|-------------|--------------------|
| 89.53          | 0.20       | 2.82        | $1.37 \times 10^6$ |
| 88             | 0.198      | 4.64        | $3.65 \times 10^6$ |
| 84             | 0.17       | 8.21        | $1.36 \times 10^7$ |
| 80             | 0.14       | 10.97       | $2.23 \times 10^7$ |
| 76             | 0.094      | 17.38       | $4.26 \times 10^7$ |
| 72             | 0.037      | 45.46       | $2.99 \times 10^8$ |

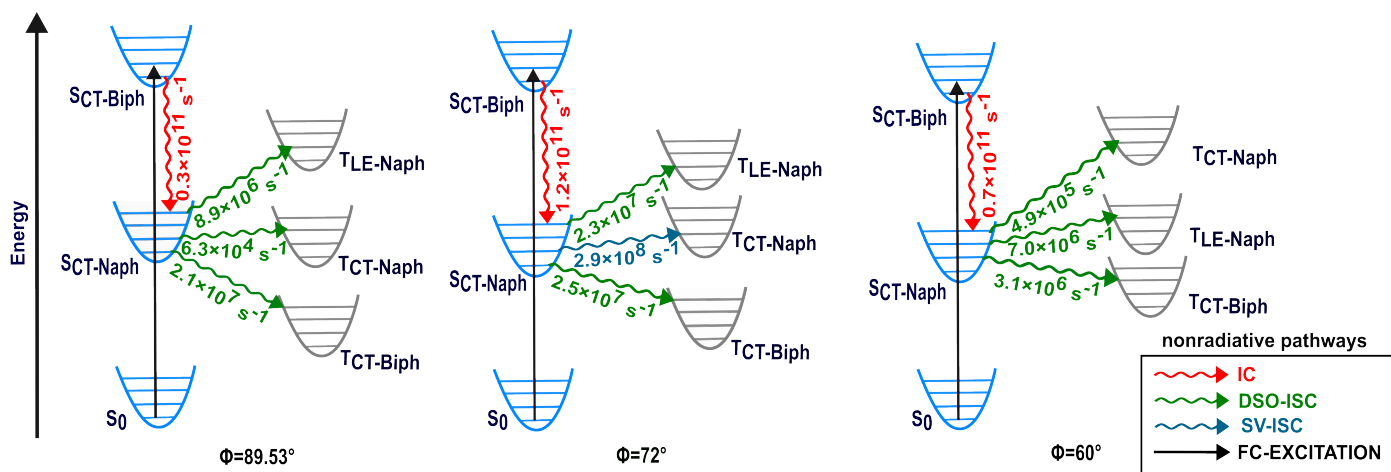

**Fig S7.** Schematic diagram of internal conversion (IC) and ISC mechanisms at various dihedral angles and their associated rate constants.

To examine the validity of the proposed ISC mechanism operating in molecule **2**, we have calculated the rate constant of internal conversion (IC) between the  $S_{CT-Biph}$  and  $S_{CT-Naph}$  states down to  $60^\circ$  and the corresponding data are collected in Table S8. The calculated  $k_{IC}$  values are of the order of  $10^{11}$  and the values are quite close to the experimentally observed IC rate constant<sup>6</sup> ( $0.5 \times 10^{11} s^{-1}$ ) at all dihedral angles, suggesting that sufficient population transfer to the  $S_{CT-Naph}$  state is possible. In particular, the value of  $k_{IC}$  at  $72^\circ$  is  $1.22 \times 10^{11} s^{-1}$  which guarantees participation of the lowest excited singlet state ( $S_{CT-Naph}$ ) in the SV-ISC mechanism. The pictorial representation of various ISC mechanisms at three different dihedral angles are shown in Fig S7a and the trends are very similar to that found for molecule **1** in the main manuscript. The inset box in the lower right of Fig S7 contains the colors used for various nonradiative processes such as IC and ISC, and Franck-Condon excitation.

The major findings based on our theoretically evaluated nonradiative rate constants for molecules **1** and **2**

**Table S8.**  $k_{IC}$  at 300K in  $s^{-1}$  of  $S_{CT-Biph} \rightsquigarrow S_{CT-Naph}$  channel and  $\Delta E$  and NAC between  $S_{CT-Phen}$  and  $S_{CT-Naph}$  in eV and bohr $^{-1}$ .

| Dihedral angle | $\Delta E$ | norm of NAC | $k_{IC}$              |
|----------------|------------|-------------|-----------------------|
| 89.53          | 0.153      | 1.83        | $0.34 \times 10^{11}$ |
| 88             | 0.154      | 1.85        | $2.84 \times 10^{11}$ |
| 84             | 0.158      | 1.86        | $2.52 \times 10^{11}$ |
| 80             | 0.168      | 1.84        | $0.93 \times 10^{11}$ |
| 76             | 0.17       | 1.89        | $1.11 \times 10^{11}$ |
| 72             | 0.19       | 1.94        | $1.22 \times 10^{11}$ |
| 68             | 0.21       | 2.01        | $1.22 \times 10^{11}$ |
| 64             | 0.23       | 2.07        | $1.20 \times 10^{11}$ |
| 60             | 0.25       | 2.12        | $0.72 \times 10^{11}$ |

elucidate the universality of the SV-ISC mechanism for the population gain in the lowest triplet state of a donor-acceptor dyad separated by a single bond.

## S7 ISC mechanisms of molecule 3 and 4

**Table S9.** Direct SOC induced  $k_{ISC}$  at 300K, energy gap and the magnitude of the spin-orbit coupling at different dihedral angles of molecule **3**. Here, a, b and c represent  $S_{CT-Naph} \rightsquigarrow T_{CT-Phen}$ ,  $S_{CT-Naph} \rightsquigarrow T_{LE-Naph}$  and  $S_{CT-Naph} \rightsquigarrow T_{CT-Naph}$  transitions, respectively. The unit of  $k_{ISC}$ ,  $\Delta E$  and SOC are  $s^{-1}$ , eV and  $cm^{-1}$ , respectively.

| Dihedral angle | $\Delta E^a$ | SOC <sup>a</sup> | $k_{ISC}^a$        | $\Delta E^b$ | SOC <sup>b</sup> | $k_{ISC}^b$        | $\Delta E^c$ | SOC <sup>c</sup> | $k_{ISC}^c$        |
|----------------|--------------|------------------|--------------------|--------------|------------------|--------------------|--------------|------------------|--------------------|
| 89.80          | 0.12         | 0.926            | $2.74 \times 10^7$ | -0.126       | 0.91             | $3.75 \times 10^6$ | -0.002       | 0.08             | $2.02 \times 10^5$ |
| 88             | 0.12         | 0.917            | $2.55 \times 10^7$ | -0.128       | 0.894            | $3.16 \times 10^6$ | -0.002       | 0.11             | $3.65 \times 10^5$ |
| 84             | 0.118        | 0.907            | $2.69 \times 10^7$ | -0.116       | 0.890            | $4.15 \times 10^6$ | -0.01        | 0.18             | $1.27 \times 10^6$ |
| 80             | 0.113        | 0.904            | $2.56 \times 10^7$ | -0.092       | 0.888            | $3.28 \times 10^6$ | -0.03        | 0.25             | $1.57 \times 10^6$ |
| 78             | 0.109        | 0.911            | $2.18 \times 10^7$ | -0.077       | 0.879            | $2.41 \times 10^6$ | -0.04        | 0.28             | $4.85 \times 10^6$ |
| 76             | 0.10         | 0.901            | $1.66 \times 10^7$ | -0.063       | 0.881            | $1.59 \times 10^6$ | -0.056       | 0.31             | $0.74 \times 10^6$ |
| 72             | 0.084        | 0.911            | $0.86 \times 10^7$ | -0.029       | 0.884            | $2.53 \times 10^6$ | -0.09        | 0.37             | $3.77 \times 10^5$ |
| 68             | 0.058        | 0.909            | $3.13 \times 10^6$ | 0.003        | 0.896            | $0.68 \times 10^6$ | -0.12        | 0.42             | $1.27 \times 10^5$ |
| 64             | 0.039        | 0.917            | $1.89 \times 10^6$ | 0.034        | 0.931            | $0.94 \times 10^6$ | -0.16        | 0.47             | $3.24 \times 10^5$ |
| 60             | -0.002       | 0.899            | $8.73 \times 10^5$ | 0.053        | 0.981            | $1.13 \times 10^6$ | -0.19        | 0.54             | $5.09 \times 10^5$ |

**Table S10.** Spin-vibronic coupling driven  $k_{ISC}$  of molecule **3** at 300K in  $s^{-1}$  of  $S_{CT-Naph} \rightsquigarrow T_{CT-Naph}$  and  $\Delta E$  and NAC between  $T_{LE-Naph}$  and  $T_{CT-Naph}$  in eV and bohr $^{-1}$  respectively.

| Dihedral angle | $\Delta E$ | norm of NAC | $k_{ISC}^{SV}$     |
|----------------|------------|-------------|--------------------|
| 89.80          | 0.124      | 4.80        | $0.64 \times 10^5$ |
| 88             | 0.126      | 4.83        | $0.71 \times 10^5$ |
| 84             | 0.104      | 6.83        | $2.41 \times 10^5$ |
| 80             | 0.062      | 13.11       | $1.95 \times 10^6$ |
| 78             | 0.034      | 28.08       | $1.12 \times 10^7$ |
| 76             | 0.007      | 148.66      | $5.11 \times 10^8$ |

In addition to molecules **1** and **2**, the other two important D-A molecules investigated here also support our proposed accidental triplet harvesting mechanism. The structure of these two molecules (**3** and **4**) and the rotation axes are shown in Figs S8a and S10a, respectively. We find that the nature of the excited singlet and triplet states obtained upon photoexcitation are the same as those of **1** and **2** and the relevant excitation characters are depicted in Figs S8b and S10b. For both **3** and **4**, the variation of the relative energies of the excited electronic states (singlet and triplets) due to the rotation around the C-N sigma bond are shown in Figs S8c and S10c. From these figures, the only significant change that can be noted is the rapid decrease

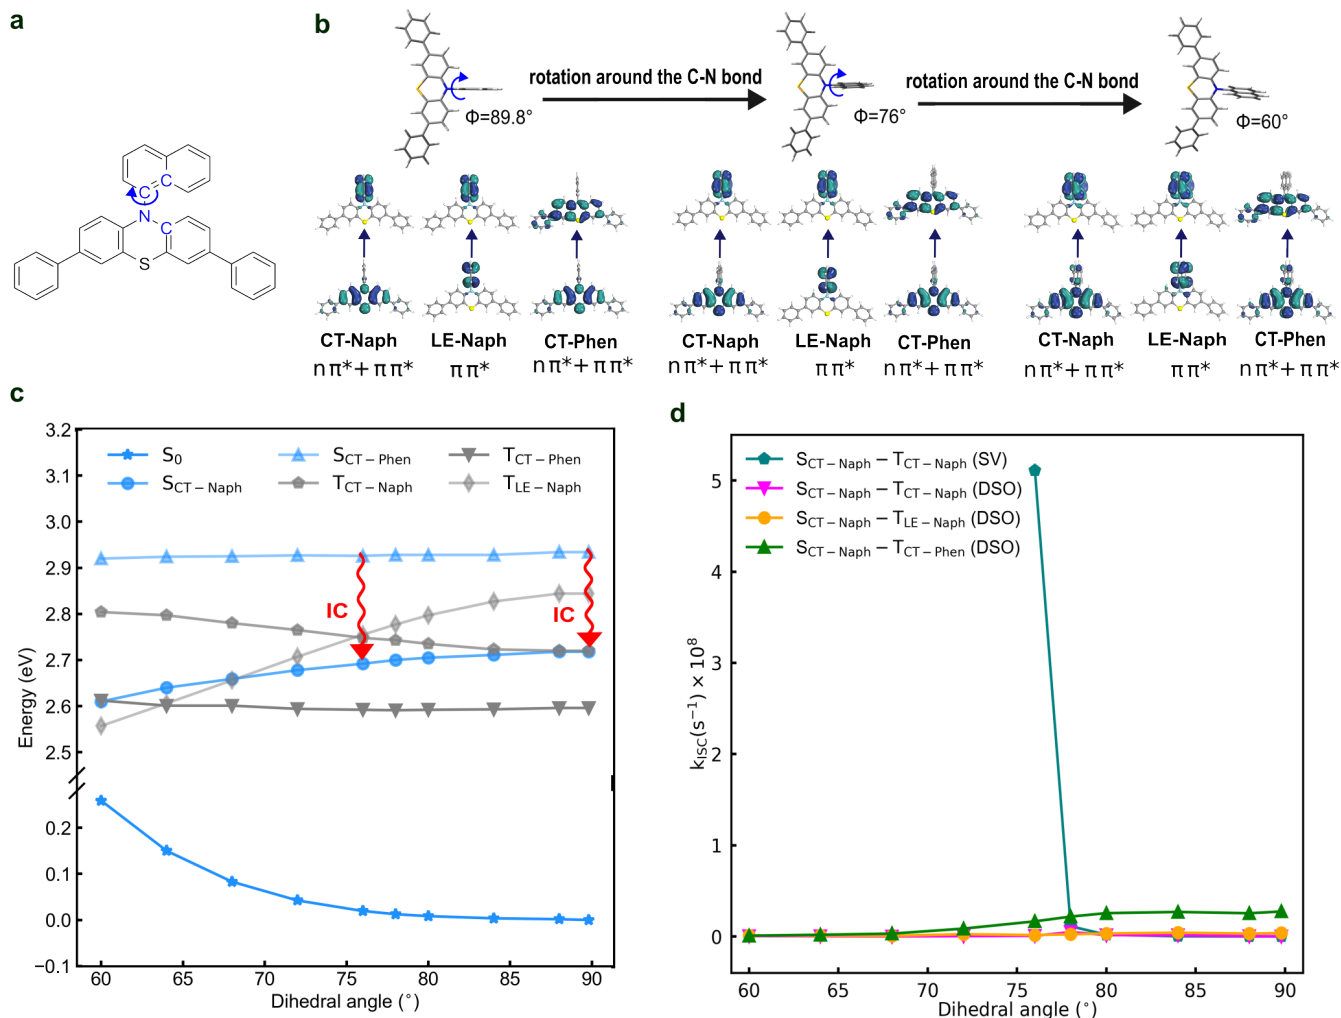

**Fig S8.** (a) Structure of the photoredox molecule **3** and the rotation along the C-N bond involving the dihedral angle of the C-C-N-C atoms in blue color. (b) Nature of the CASSCF orbitals involved in generation of the CT-Naph, CT-Phen and LE-Naph states and their orbital mixing with decrease in dihedral angle. (c) Potential energy surfaces of CT-Naph, CT-Phen and LE-Naph singlets and triplets states generated due to free rotation around the sigma bond. (d) Nature of variation of  $k_{ISC}$  for both DSO and SV mechanisms.

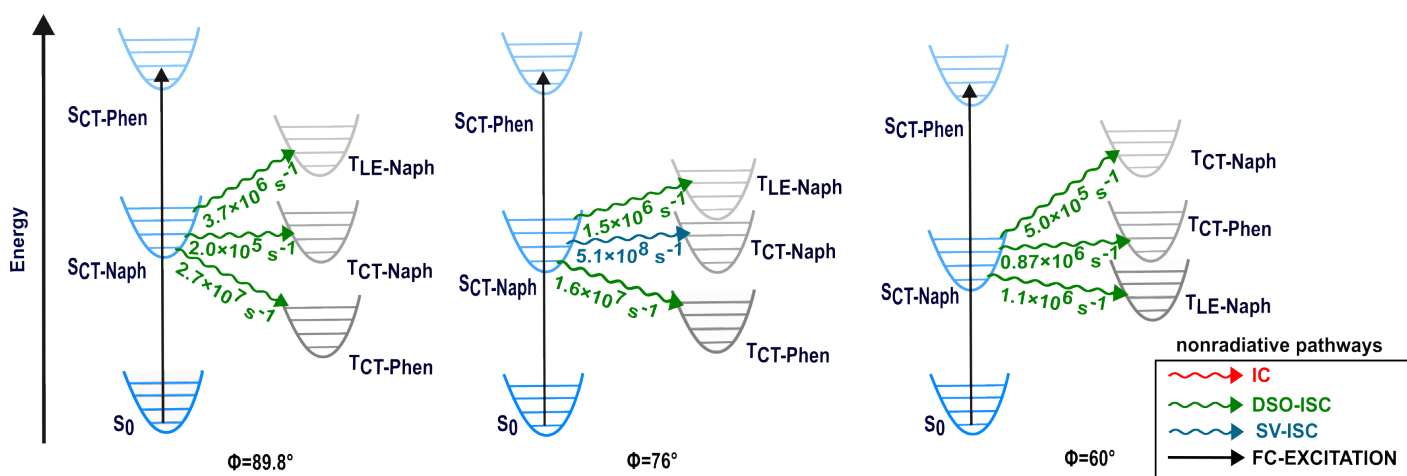

**Fig S9.** Schematic diagram of ISC mechanisms of molecule **3** at various dihedral angles and their associated rate constants.

of energy of the  $T_{LE-Naph}$  state and as a consequence, the potential energy curves of  $T_{LE-Naph}$  crosses  $T_{CT-Naph}$  and  $S_{CT-Naph}$  at earlier dihedral angles compared to what was observed in molecules **1** and **2**. Interestingly, the possible ISC pathways in both **3** and **4** are also identical to what has been seen in **1**. The energy gap, direct-SOC

and the associated rate constants of all three probable pathways are also provided in Tables S9 and S11. The computed rate constants indicate that none of the possible DSO-assisted ISC pathways are capable of reaching the experimental ISC rate constants of  $1.7\text{-}2.3 \times 10^8$  and  $1.5\text{-}1.8 \times 10^8 \text{ s}^{-1}$  for **3** and **4**, respectively.<sup>8</sup> However, after incorporating the effect of the SV part into the the expression of  $k_{\text{ISC}}$  along the  $S_{\text{CT-Naph}} \rightsquigarrow T_{\text{CT-Naph}}$  pathway of molecules **3** and **4**, the rate constants have increased substantially and the corresponding values have been found to be  $5.11 \times 10^8$  and  $1.67 \times 10^8 \text{ s}^{-1}$ , respectively. Overall, the calculated results corroborate well with the experimental findings. We also note that in molecules **3** and **4**, the largest SV-aided  $k_{\text{ISC}}$  are found at dihedral angles of  $76^\circ$  and  $78^\circ$ , respectively. The variation of the DSO and the SV-induced ISC rate constants at various dihedral angles for both molecules are shown in Figs S8d and S10d. The computed SV-guided ISC rate constants are also presented in Tables S10 and S12. Pictorial representations of DSO- and SV-favored ISC routes and their associated rate constants at three different dihedral angles are also depicted in Figs S9 and S11. From these theoretical findings, we can infer that all the molecules studied follow the free rotation induced accidental SV mechanism to ensure efficient triplet harvesting process.

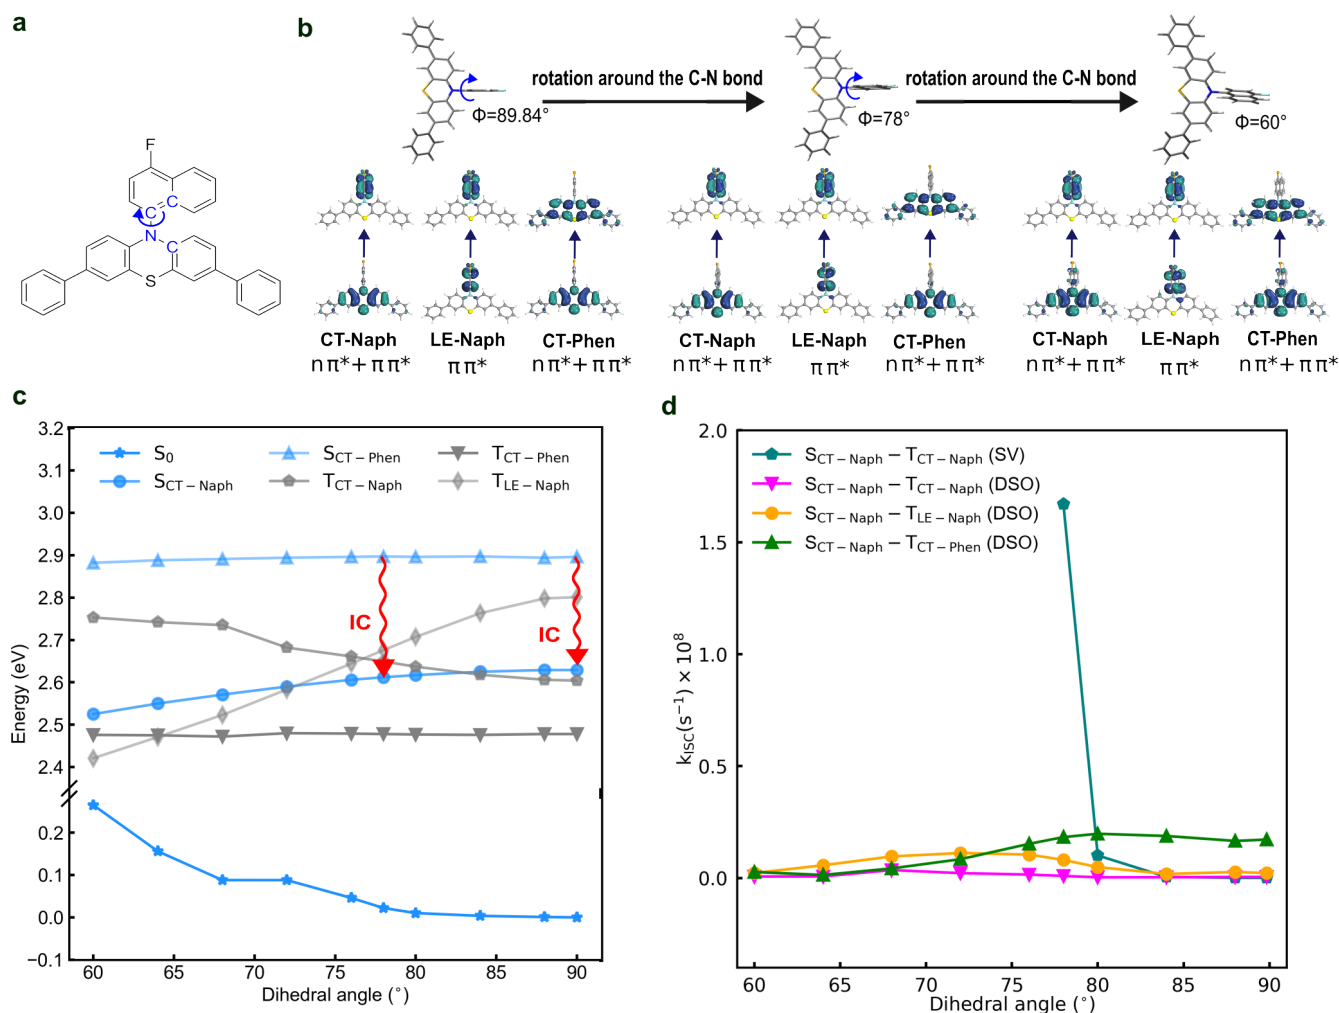

**Fig S10.** (a) Structure of the photoredox molecule **4** and the rotation along the C-N bond involving the dihedral angle of the C-C-N-C atoms in blue color. (b) Nature of the CASSCF orbitals involved in generation of the CT-Naph, CT-Phen and LE-Naph states and their orbital mixing with decrease in dihedral angle. (c) Potential energy surfaces of CT-Naph, CT-Phen and LE-Naph singlets and triplets states generated due to free rotation around the sigma bond. (d) Nature of variation of  $k_{\text{ISC}}$  for both DSO and SV mechanisms.

**Table S11.** Direct SOC induced  $k_{ISC}$  at 300K, energy gap and the magnitude of the spin-orbit coupling at different dihedral angles of molecule **4**. Here, a, b and c represent  $S_{CT-Naph} \rightsquigarrow T_{CT-Phen}$ ,  $S_{CT-Naph} \rightsquigarrow T_{LE-Naph}$  and  $S_{CT-Naph} \rightsquigarrow T_{CT-Naph}$  transitions, respectively. The unit of  $k_{ISC}$ ,  $\Delta E$  and SOC are  $s^{-1}$ , eV and  $cm^{-1}$ , respectively.

| Dihedral angle | $\Delta E^a$ | SOC <sup>a</sup> | $k_{ISC}^a$        | $\Delta E^b$ | SOC <sup>b</sup> | $k_{ISC}^b$        | $\Delta E^c$ | SOC <sup>c</sup> | $k_{ISC}^c$        |
|----------------|--------------|------------------|--------------------|--------------|------------------|--------------------|--------------|------------------|--------------------|
| 89.84          | 0.151        | 0.851            | $1.72 \times 10^7$ | -0.172       | 0.724            | $2.26 \times 10^6$ | 0.025        | 0.167            | $5.32 \times 10^5$ |
| 88             | 0.151        | 0.841            | $1.66 \times 10^7$ | -0.169       | 0.722            | $2.71 \times 10^6$ | 0.023        | 0.169            | $5.19 \times 10^5$ |
| 84             | 0.149        | 0.858            | $1.88 \times 10^7$ | -0.138       | 0.715            | $1.85 \times 10^6$ | 0.007        | 0.206            | $3.67 \times 10^5$ |
| 80             | 0.14         | 0.879            | $1.98 \times 10^7$ | -0.09        | 0.699            | $4.90 \times 10^6$ | -0.02        | 0.252            | $3.49 \times 10^5$ |
| 78             | 0.134        | 0.893            | $1.83 \times 10^7$ | -0.064       | 0.702            | $0.81 \times 10^7$ | -0.037       | 0.270            | $9.47 \times 10^5$ |
| 76             | 0.127        | 0.908            | $1.53 \times 10^7$ | -0.038       | 0.700            | $1.05 \times 10^7$ | -0.055       | 0.287            | $1.57 \times 10^6$ |
| 72             | 0.11         | 0.943            | $0.84 \times 10^7$ | 0.007        | 0.709            | $1.12 \times 10^7$ | -0.092       | 0.33             | $2.21 \times 10^6$ |
| 68             | 0.099        | 0.953            | $4.31 \times 10^6$ | 0.048        | 0.724            | $0.96 \times 10^7$ | -0.164       | 0.40             | $3.58 \times 10^6$ |
| 64             | 0.075        | 1.01             | $1.39 \times 10^6$ | 0.079        | 0.766            | $5.72 \times 10^6$ | -0.192       | 0.38             | $0.73 \times 10^6$ |
| 60             | 0.049        | 1.05             | $2.71 \times 10^6$ | 0.104        | 0.829            | $2.28 \times 10^6$ | -0.228       | 0.41             | $0.72 \times 10^6$ |

**Table S12.** Spin-vibronic coupling driven  $k_{ISC}$  of molecule **4** at 300K in  $s^{-1}$  of  $S_{CT-Naph} \rightsquigarrow T_{CT-Naph}$  and  $\Delta E$  and NAC between  $T_{LE-Naph}$  and  $T_{CT-Naph}$  in eV and bohr<sup>-1</sup> respectively.

| Dihedral angle | $\Delta E$ | norm of NAC | $k_{ISC}^{SV}$     |
|----------------|------------|-------------|--------------------|
| 89.84          | 0.197      | 2.99        | $0.99 \times 10^5$ |
| 88             | 0.192      | 3.14        | $1.15 \times 10^5$ |
| 84             | 0.145      | 4.94        | $5.61 \times 10^5$ |
| 80             | 0.07       | 12.50       | $1.01 \times 10^7$ |
| 78             | 0.027      | 35.68       | $1.67 \times 10^8$ |

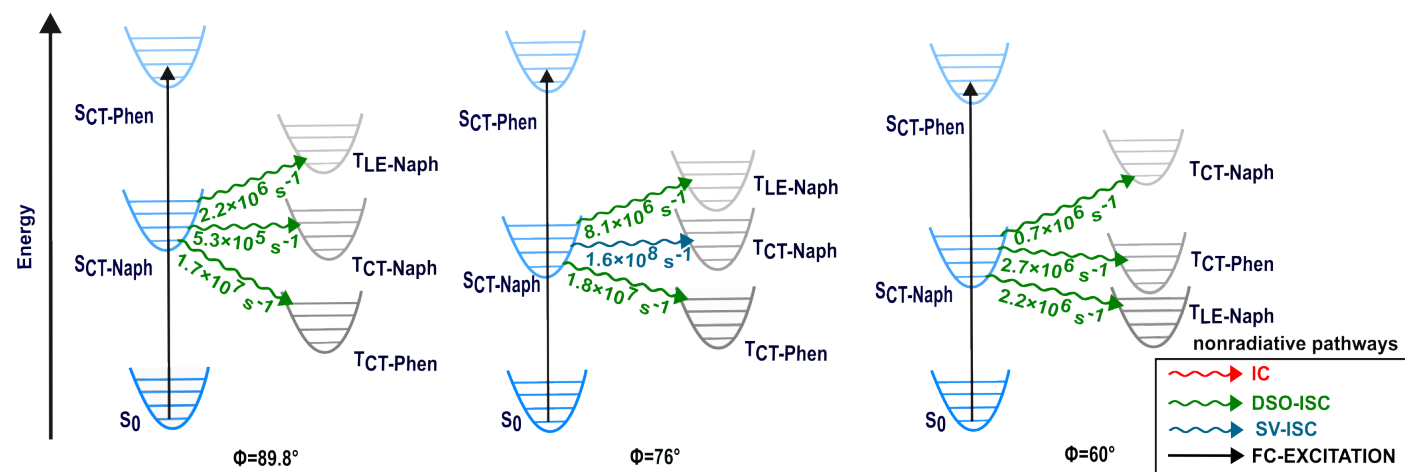

**Fig S11.** Schematic diagram of ISC mechanisms of molecule **4** at various dihedral angles and their associated rate constants.

## S8 Discussion about the Duschinsky rotation matrix (**J**) and displacement vector (**D**)

Upon photoexcitation from the ground to the excited electronic state, the normal mode coordinates of the excited state gets displaced and rotated with respect to the ground state. This is true for any pair of initial and final electronic states. If the normal mode coordinates of the initial and final electronic states are represented by  $\mathbf{Q}_i$  and  $\mathbf{Q}_f$ , respectively, the connection between these two coordinates is described by the following relation

$$\mathbf{Q}_f = \sum_i \mathbf{J}_{if} \mathbf{Q}_i + \mathbf{D}_f, \quad (\text{S1})$$

where **J** and **D** are the Duschinsky rotation matrix and displacement vectors, respectively. **J** is a unit less matrix whereas **D** can be expressed in massweighted coordinate with units of  $(\text{amu})^{0.5}$  as

$$\mathbf{D} = \mathbf{L}\sqrt{m}(r - r') \quad (\text{S2})$$

The graphical representation of the relation between the normal-mode coordinates of the ground and excited

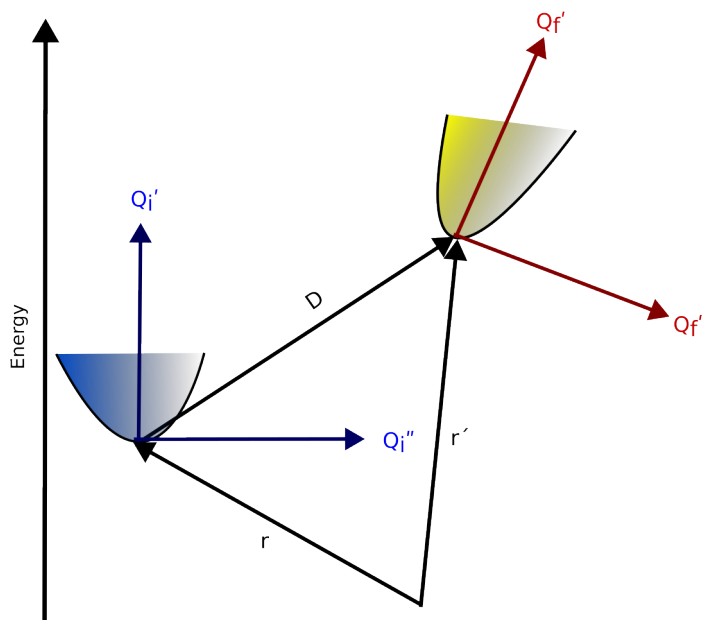

**Fig S12.** Relation between the normal mode coordinates of the initial and the final electronic state in terms of rotation and displacement.

electronic states is shown in Fig S12. Here,  $\mathbf{Q}'$  and  $\mathbf{Q}''$  represents the coordinates of the normal mode of the initial and final electronic states, respectively.  $r$  and  $r'$  denotes the Cartesian displacements of the initial and final states, respectively, with respect to a reference point. **L** is the eigenvector matrix obtained after diagonalizing the mass-weighted Cartesian force constant matrix and  $m$  indicates the mass of the nuclei. **D** is simply the translation of the final state with respect to that of initial state. **J** on the other hand rotates the normal coordinates of the final electronic state with respect to that of the initial state. **J** is a unitary matrix and thus in principle, the determinant of this matrix should be one. However, a large number of off-diagonal elements may be found if the vibrational and the rotational motions are coupled as has been observed for geometries with significant change in different structural parameters such as dihedral angles, bond angles and bond lengths. In this situation, the determinant of **J** will deviate from 1. The off-diagonal elements of the Duschinsky rotation matrix actually indicate the coupling between normal modes of two different electronic states. The larger the off-diagonal elements, the higher will the coupling between them be. Usually, a small energy gap and large SOC play dominant roles in determining the values of  $k_{\text{ISC}}$  rate constant. However, when vibrational effects are taken into account in the computation of any nonradiative rate constants, the Duschinsky rotation matrix and displacement vectors appear automatically and they often also play important roles. For example, the displacement vector may change the value of  $k_{\text{ISC}}$  by two orders of magnitude for fluorenone while the Duschinsky rotation and displacement vector may alter the rate constant of ISC of benzophenone by

one order of magnitude.<sup>9</sup> It has also been found that for an energy gap less than 0.7 eV between the singlet and the triplet states, the ISC rate constant without Duschinsky rotation is decreased by one to three orders magnitude.<sup>10</sup>

### S9 $k_{ISC}^{DSO}$ values at 300K for all three pathways of molecules 1 and 2 with or without incorporating the effect of Duschinsky rotation matrix (J) and displacement vector (D) at different dihedral angles

**Table S13.** a,b and c represent  $k_{ISC}^{DSO}$  of  $S_{CT-Naph} \rightsquigarrow T_{CT-Phen}$ ,  $S_{CT-Naph} \rightsquigarrow T_{LE-Naph}$  and  $S_{CT-Naph} \rightsquigarrow T_{CT-Naph}$  transitions, respectively, with I and II indicate without inclusion of Duschinsky rotation matrix (J) and displacement vector (D) respectively. The unit of  $k_{ISC}$ ,  $\Delta E$  and SOC are  $s^{-1}$ , eV and  $cm^{-1}$ , respectively.

| Dihedral angle | $k_{ISC}^{a,I}$    | $k_{ISC}^{a,II}$   | $k_{ISC}^{b,I}$    | $k_{ISC}^{b,II}$   | $k_{ISC}^{c,I}$    | $k_{ISC}^{c,II}$   |
|----------------|--------------------|--------------------|--------------------|--------------------|--------------------|--------------------|
| 90.2           | $3.21 \times 10^7$ | $3.80 \times 10^6$ | $4.06 \times 10^5$ | $6.07 \times 10^7$ | $6.29 \times 10^5$ | $5.11 \times 10^6$ |
| 88             | $3.57 \times 10^7$ | $1.34 \times 10^6$ | $9.98 \times 10^5$ | $6.43 \times 10^7$ | $8.65 \times 10^5$ | $7.03 \times 10^6$ |
| 84             | $4.16 \times 10^7$ | $3.47 \times 10^6$ | $2.12 \times 10^6$ | $3.04 \times 10^7$ | $1.89 \times 10^6$ | $1.48 \times 10^7$ |
| 80             | $3.86 \times 10^7$ | $3.17 \times 10^7$ | $4.02 \times 10^6$ | $2.95 \times 10^7$ | $3.23 \times 10^6$ | $2.24 \times 10^7$ |
| 76             | $2.48 \times 10^7$ | $2.75 \times 10^7$ | $7.77 \times 10^6$ | $3.47 \times 10^7$ | $3.55 \times 10^6$ | $1.98 \times 10^7$ |
| 72             | $7.08 \times 10^6$ | $4.21 \times 10^7$ | $1.37 \times 10^7$ | $7.86 \times 10^7$ | $5.03 \times 10^6$ | $2.45 \times 10^7$ |
| 68             | $2.35 \times 10^6$ | $4.11 \times 10^7$ | $4.79 \times 10^6$ | $5.78 \times 10^7$ | $2.97 \times 10^6$ | $2.89 \times 10^7$ |
| 64             | $4.54 \times 10^6$ | $4.82 \times 10^7$ | $1.64 \times 10^7$ | $7.61 \times 10^7$ | $6.49 \times 10^5$ | $6.08 \times 10^6$ |
| 60             | $4.00 \times 10^6$ | $5.09 \times 10^7$ | $3.50 \times 10^6$ | $8.07 \times 10^7$ | $3.81 \times 10^5$ | $3.54 \times 10^5$ |

The detailed discussion of the influence of the Duschinsky rotation matrix and displacement vector on the intersystem crossing rate of molecule 1 are provided in the main manuscript and the computed rate constants are given in Table S13.

**Table S14.** a,b and c represent  $k_{ISC}^{DSO}$  of  $S_{CT-Naph} \rightsquigarrow T_{CT-Biph}$ ,  $S_{CT-Naph} \rightsquigarrow T_{LE-Naph}$  and  $S_{CT-Naph} \rightsquigarrow T_{CT-Naph}$  transitions, respectively, with I and II indicate without inclusion of Duschinsky rotation matrix (J) and displacement vector (D) respectively. The unit of  $k_{ISC}$ ,  $\Delta E$  and SOC are  $s^{-1}$ , eV and  $cm^{-1}$ , respectively.

| Dihedral angle | $k_{ISC}^{a,I}$    | $k_{ISC}^{a,II}$   | $k_{ISC}^{b,I}$    | $k_{ISC}^{b,II}$   | $k_{ISC}^{c,I}$    | $k_{ISC}^{c,II}$   |
|----------------|--------------------|--------------------|--------------------|--------------------|--------------------|--------------------|
| 89.53          | $3.57 \times 10^7$ | $1.82 \times 10^7$ | $5.20 \times 10^4$ | $3.86 \times 10^7$ | $1.58 \times 10^5$ | $1.14 \times 10^6$ |
| 88             | $8.11 \times 10^7$ | $3.67 \times 10^7$ | $1.86 \times 10^5$ | $1.38 \times 10^8$ | $4.50 \times 10^5$ | $3.09 \times 10^6$ |
| 84             | $9.44 \times 10^7$ | $5.11 \times 10^7$ | $2.27 \times 10^6$ | $1.18 \times 10^8$ | $1.12 \times 10^6$ | $1.25 \times 10^7$ |
| 80             | $8.67 \times 10^7$ | $4.21 \times 10^7$ | $5.79 \times 10^6$ | $6.43 \times 10^7$ | $5.92 \times 10^5$ | $2.16 \times 10^7$ |
| 76             | $5.08 \times 10^7$ | $4.74 \times 10^7$ | $1.36 \times 10^7$ | $1.61 \times 10^7$ | $3.89 \times 10^5$ | $2.10 \times 10^7$ |
| 72             | $2.67 \times 10^7$ | $5.07 \times 10^7$ | $2.95 \times 10^7$ | $7.73 \times 10^7$ | $2.58 \times 10^6$ | $1.85 \times 10^7$ |
| 68             | $2.76 \times 10^6$ | $6.21 \times 10^7$ | $1.78 \times 10^7$ | $1.41 \times 10^8$ | $1.91 \times 10^6$ | $8.01 \times 10^6$ |
| 64             | $1.29 \times 10^7$ | $6.07 \times 10^7$ | $5.25 \times 10^7$ | $1.76 \times 10^8$ | $8.04 \times 10^6$ | $3.24 \times 10^6$ |
| 60             | $4.60 \times 10^6$ | $4.36 \times 10^7$ | $7.14 \times 10^6$ | $1.43 \times 10^8$ | $2.82 \times 10^6$ | $3.37 \times 10^4$ |

In molecule 2, the role of J and D on  $k_{ISC}$  in all three pathways, (a),(b) and (c) are the same as that already observed for 1. The relevant results for 2 are also provided in Table S14.

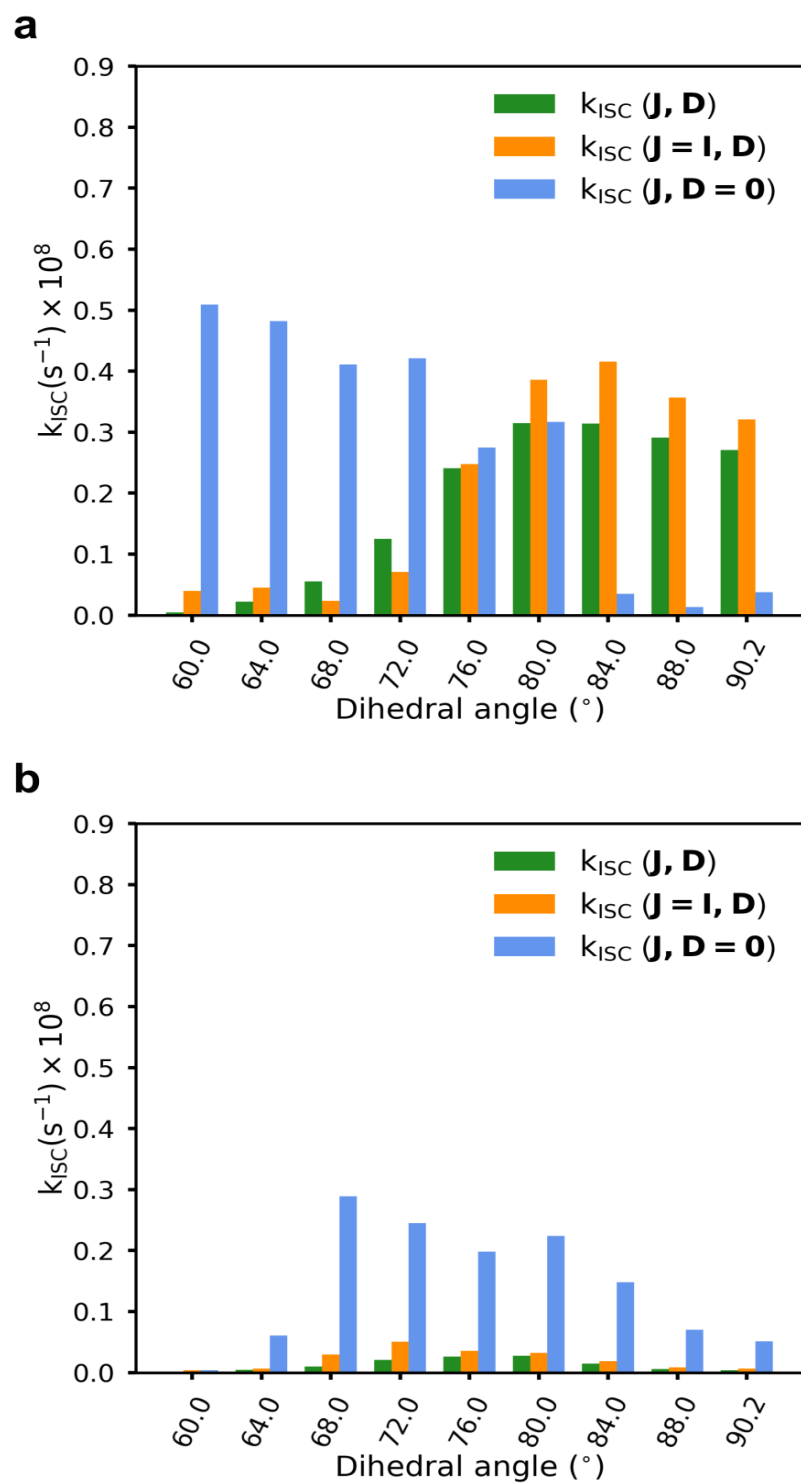

**Fig S13.** Effect of Duschinsky rotation matrix ( $\mathbf{J}$ ) and displacement vectors ( $\mathbf{D}$ ) on  $k_{ISC}^{DSO}$  of (a)  $S_{CT-Naph} \rightsquigarrow T_{CT-Phen}$  and (b)  $S_{CT-Naph} \rightsquigarrow T_{CT-Naph}$  channels of molecule 1.



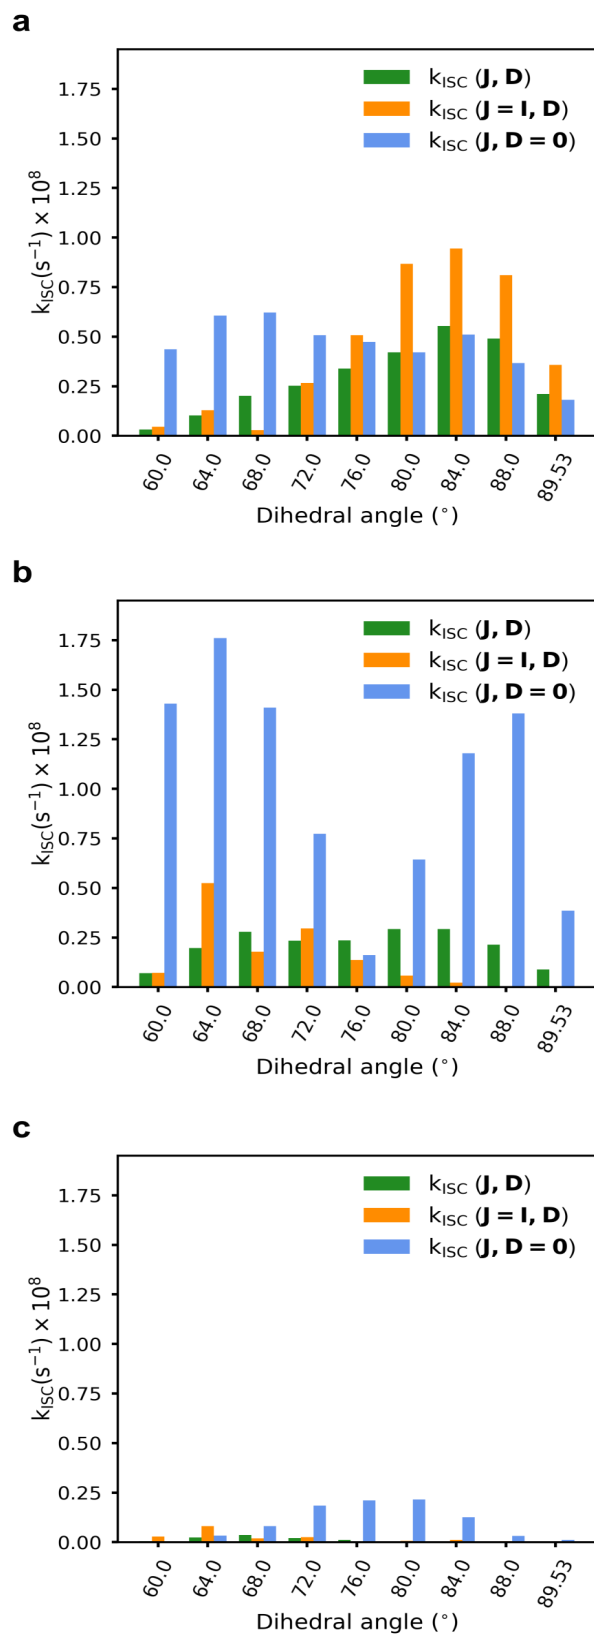

**Fig S14.** Effect of Duschinsky rotation matrix ( $\mathbf{J}$ ) and displacement vectors ( $\mathbf{D}$ ) on  $k_{ISC}^{DSO}$  of (a)  $S_{CT-Naph} \rightsquigarrow T_{CT-Biph}$ , b)  $S_{CT-Naph} \rightsquigarrow T_{LE-Naph}$  and (c)  $S_{CT-Naph} \rightsquigarrow T_{CT-Naph}$  channels of molecule 2.

## S10 Effect of basis set on the spin-orbit coupling matrix elements

We have also computed the SOC with the def2-SVP basis set on the first excited singlet state geometry of 10-(naphthalen-1-yl)-3,7-diphenyl-10H-phenoxazine. No significant changes have been observed. The computed SOC values among  $S_{CT-Naph} \rightsquigarrow T_{CT-Naph}$ ,  $S_{CT-Naph} \rightsquigarrow T_{CT-Phen}$  and  $S_{CT-Naph} \rightsquigarrow T_{LE-Naph}$  with def2-TZVP and def2-SVP basis sets are given in Table S12.

**Table S15.** Spin-orbit coupling in  $\text{cm}^{-1}$  between  $S_{CT-Naph} \rightsquigarrow T_{CT-Naph}$ ,  $S_{CT-Naph} \rightsquigarrow T_{CT-Phen}$  and  $S_{CT-Naph} \rightsquigarrow T_{LE-Naph}$  transitions in two different basis set of molecule **1**.

| basis set | $S_{CT-Naph} \rightsquigarrow T_{CT-Naph}$ | $S_{CT-Naph} \rightsquigarrow T_{CT-Phen}$ | $S_{CT-Naph} \rightsquigarrow T_{LE-Naph}$ |
|-----------|--------------------------------------------|--------------------------------------------|--------------------------------------------|
| def2-SVP  | 0.11                                       | 1.54                                       | 0.87                                       |
| def2-TZVP | 0.14                                       | 1.59                                       | 0.91                                       |

## S11 Effect of solvent polarity on the energetic ordering of the excited states

We have computed the excitation energies of the singlet and triplet excited states (CT-Nap, LE-Naph and CT-Phen) in toluene, using both the equilibrium geometries of  $S_0$  and  $S_{CT-Naph}$  of 10-(naphthalen-1-yl)-3,7-diphenyl-10H-phenoxazine. Also in this case, the positions of the excited singlet and triplet states on the energetic scale remain practically unchanged (Fig S15) with respect to the corresponding results obtained with DMAc solvent, indicating that the solvent polarity hardly has any effect on the absorption and emission wavelengths. Although ISC rate is largely unaffected in different solvents, ISC quantum yield may be influenced by the solvent polarity.

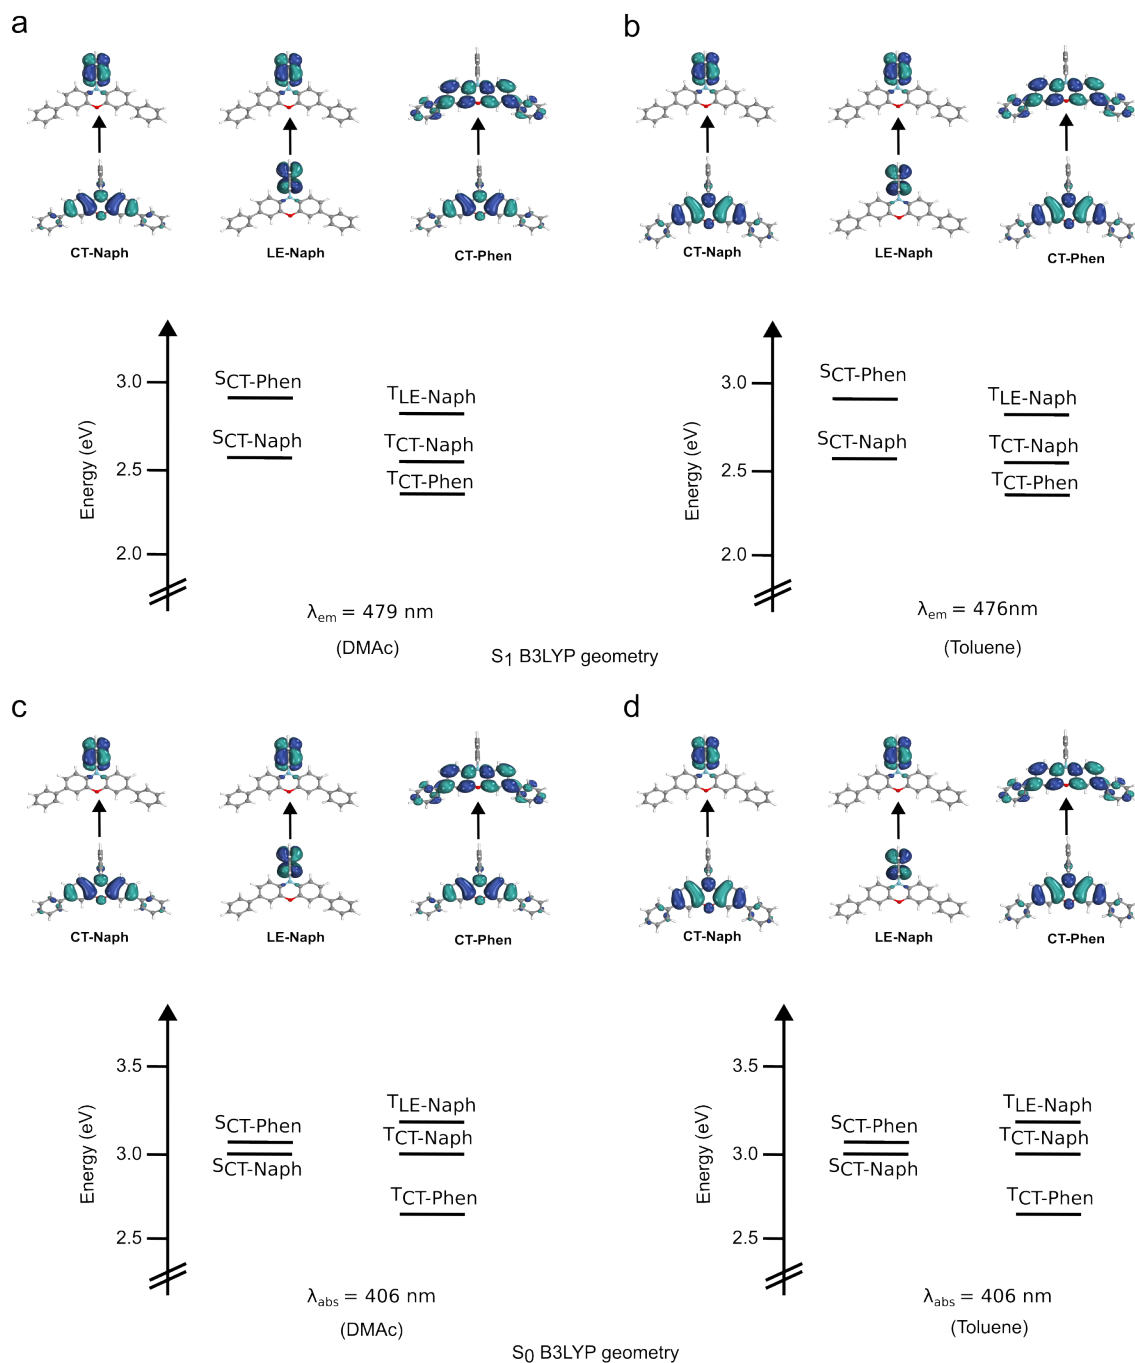

**Fig S15.** The energetic ordering of the excited singlet and triplet states in (a) DMAC and (b) toluene solvents of molecule 10-(naphthalen-1-yl)-3,7-diphenyl-10H-phenoxazine computed at the NEVPT2 level of theory.

## S12 Nature of the mode-specific NACMEs

The normal mode specific nonadiabatic coupling matrix element (NACME) between two singlets or two triplets can be expressed as,

$$\langle S/T_{CT/LE} | \frac{\partial}{\partial \mathbf{Q}_k} | S/T_{CT/LE} \rangle = \frac{\langle S/T_{CT/LE} | \frac{\partial V}{\partial \mathbf{Q}_k} | S/T_{CT/LE} \rangle}{E_{S/T_{CT/LE}} - E_{S/T_{CT/LE}}} \quad (S3)$$

Here,  $V$  and  $\mathbf{Q}_k$  are the nucleus-electron attraction operator and the normal coordinate of the  $k$ -th mode, respectively. The transformation of the NAC from Cartesian space to the normal mode specific coordinate has been done following Refs. 11,12. The energies of the singlet or triplet states having CT/LE character is defined by  $E_{S/T_{CT/LE}}$ . These nonadiabatic coupling matrix element depends upon two factors: the derivative term in the numerator and the energy gap between the two singlet or two triplet states as found in the denominator of eqn (S3). We note that the dependence of the NAC on the factor appearing in the numerator is not straightforward. For our purposes, we have computed the NAC in the singlet manifold between  $S_{CT-Phen/CT-Biph}$  and  $S_{CT-Naph}$  states for the calculation of  $k_{IC}$  at all the dihedral angles down to  $60^\circ$  while in the triplet manifold,  $k_{IC}$  between  $T_{LE-Naph}$  and  $T_{CT-Naph}$  has been calculated within the range of  $90^\circ - 72^\circ$ . From Fig 1c (main manuscript) and Fig S6c, it is evident that the energy gap between  $T_{LE-Naph}$  and  $T_{CT-Naph}$  decreases due to the change in the dihedral angle from  $90^\circ$  to  $72^\circ$  and this is true for both molecules **1** and **2**. Interestingly, this decreasing trend helps increase the magnitude of the norm of the NAC vector and mode-specific NACMEs, and the corresponding findings are reflected in the data in Tables 2 (main manuscript) and S7 and Figs S16 and S17. The nature of the variation of the mode-specific NACMEs between  $S_{CT-Phen/Biph}$  and  $S_{CT-Naph}$  with dihedral angle for both **1** and **2** are given in Figs S18 and S19, respectively.

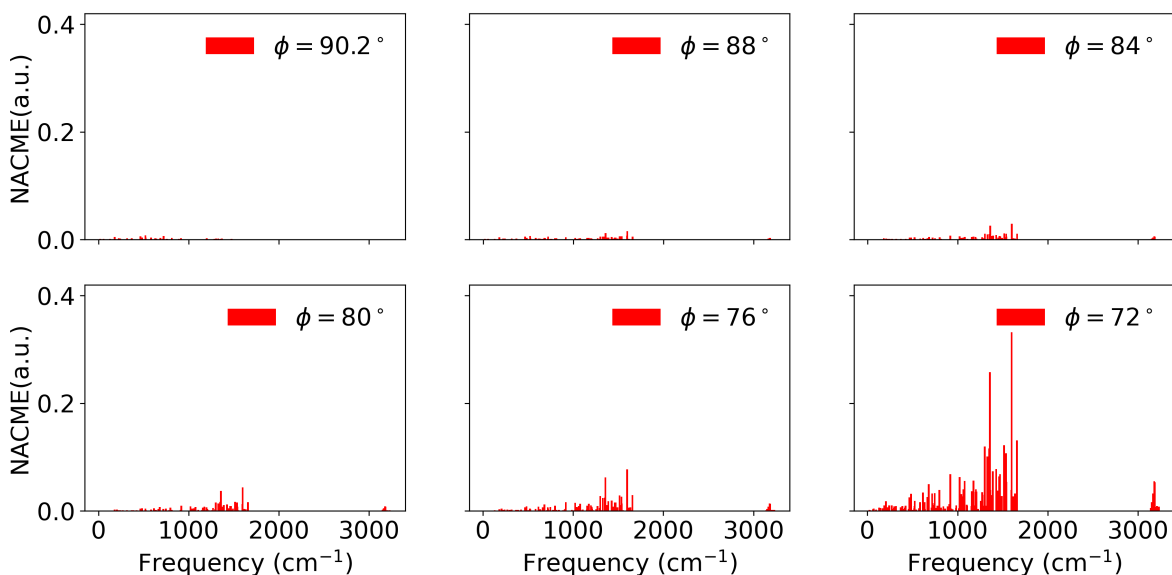

**Fig S16.** Mode specific NACMEs between the  $T_{LE-Naph}$  and  $T_{CT-Naph}$  of molecule **1**.

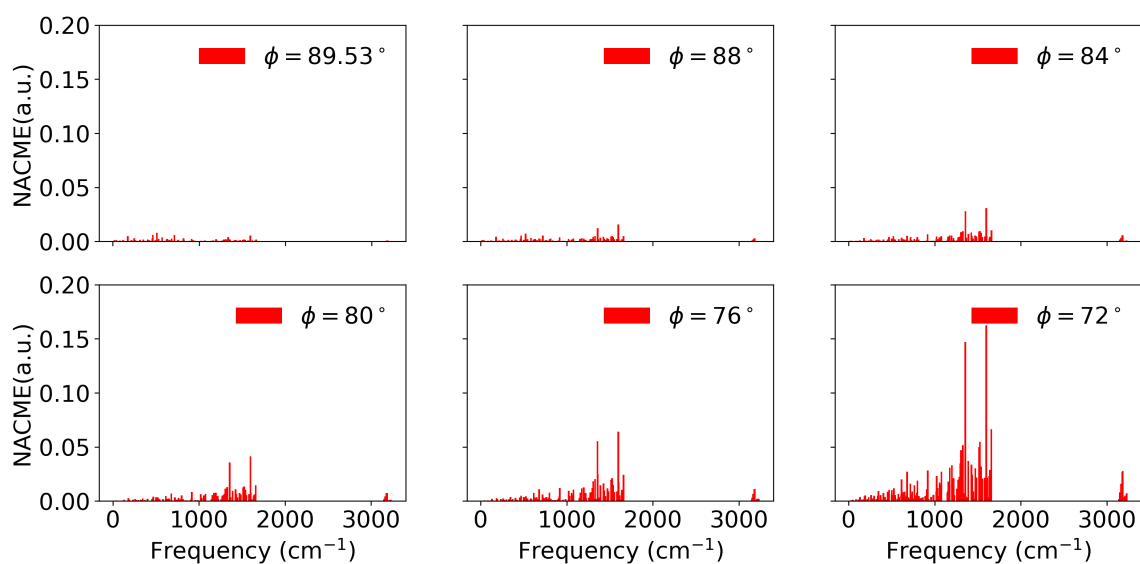

**Fig S17.** Mode specific NACME among  $T_{LE-Naph}$  and  $T_{CT-Naph}$  states of molecule **2**.

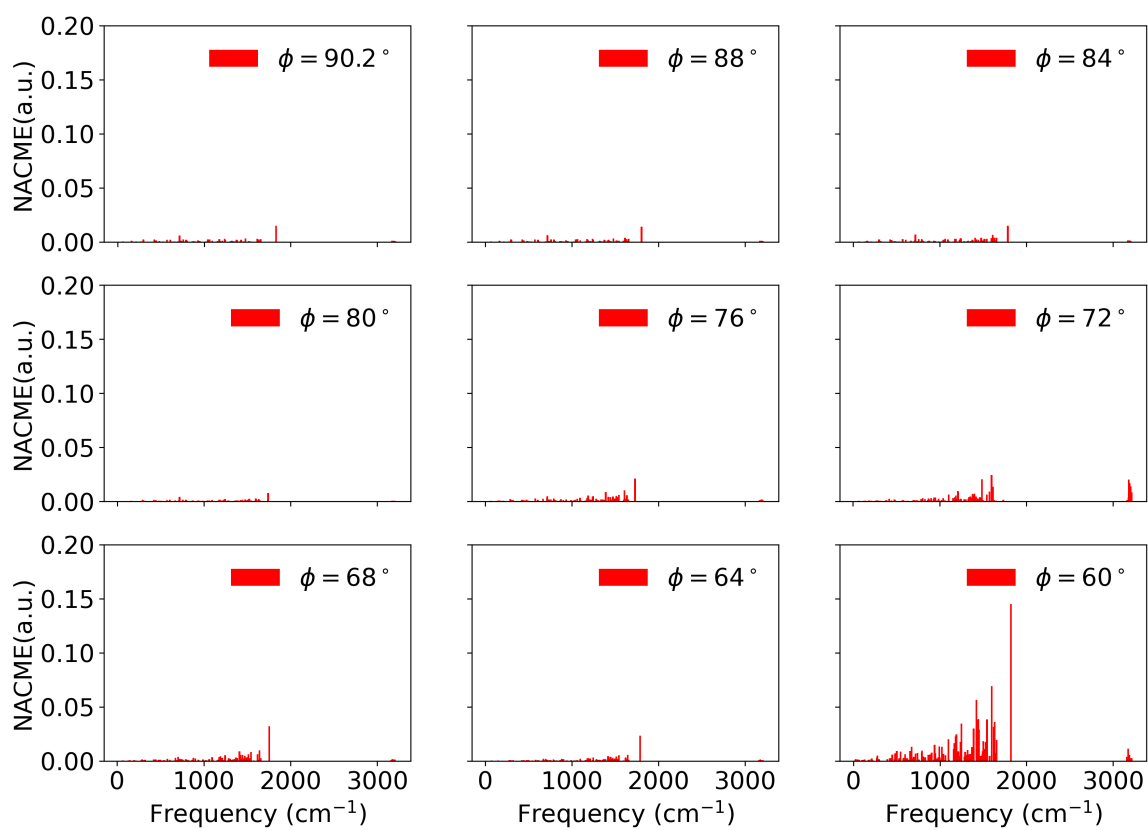

**Fig S18.** Mode specific NACMEs between the  $S_{CT-Phen}$  and  $S_{CT-Naph}$  of molecule **1**.

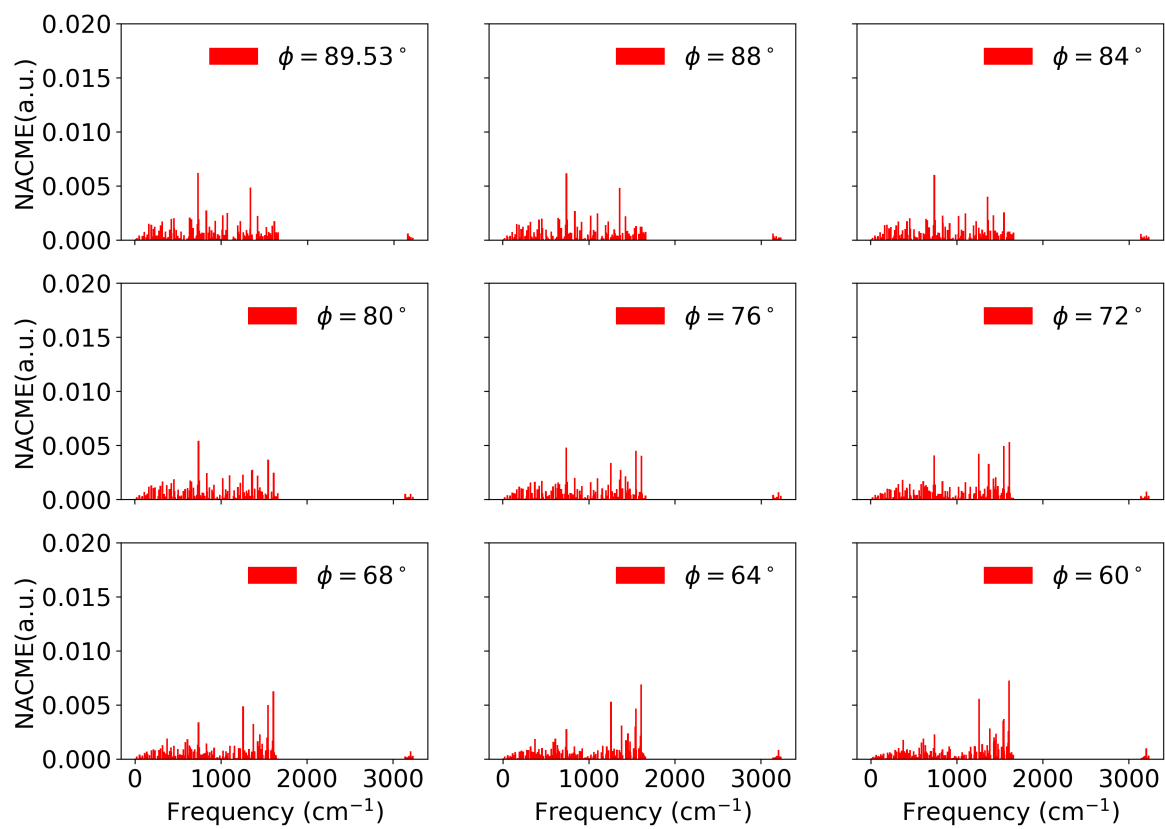

**Fig S19.** Mode specific NACME among  $S_{CT-Biph}$  and  $S_{CT-Naph}$  states of molecule 2.

**S13** Frequencies of all geometries of molecule 1 computed at (B3LYP/6-311G(d,p)) level of theory

| molecule-1     |                                                   |                        |                        |                        |                        |                                                 |
|----------------|---------------------------------------------------|------------------------|------------------------|------------------------|------------------------|-------------------------------------------------|
| $\omega_{S_0}$ | $\omega_{S_{CT-Naph}}$<br>( $\phi = 90.2^\circ$ ) | $\omega_{S_{CT-Phen}}$ | $\omega_{T_{CT-Phen}}$ | $\omega_{T_{CT-Naph}}$ | $\omega_{T_{LE-Naph}}$ | $\omega_{S_{CT-Naph}}$<br>( $\phi = 88^\circ$ ) |
| 14.98          | 18.18                                             | 15.65                  | 15.53                  | 21.48                  | 21.65                  | 18.32                                           |
| 17.49          | 22.85                                             | 23.15                  | 21.50                  | 23.26                  | 23.80                  | 22.81                                           |
| 21.40          | 31.93                                             | 30.94                  | 22.80                  | 27.57                  | 27.01                  | 31.09                                           |
| 38.50          | 38.20                                             | 34.67                  | 33.20                  | 38.86                  | 39.18                  | 38.10                                           |
| 46.64          | 39.66                                             | 45.53                  | 45.15                  | 44.43                  | 44.20                  | 39.38                                           |
| 48.04          | 49.43                                             | 51.49                  | 49.70                  | 48.33                  | 47.93                  | 49.32                                           |
| 56.31          | 55.32                                             | 54.47                  | 54.31                  | 61.27                  | 61.20                  | 54.68                                           |
| 60.00          | 68.55                                             | 64.22                  | 59.62                  | 63.29                  | 63.00                  | 68.13                                           |
| 71.09          | 88.62                                             | 89.92                  | 86.07                  | 85.76                  | 85.72                  | 88.73                                           |
| 95.46          | 95.63                                             | 105.29                 | 110.17                 | 93.19                  | 93.42                  | 95.48                                           |
| 137.90         | 127.26                                            | 126.58                 | 115.43                 | 131.61                 | 131.56                 | 127.38                                          |
| 140.14         | 136.99                                            | 139.97                 | 139.79                 | 140.95                 | 140.28                 | 136.81                                          |
| 159.31         | 161.44                                            | 161.55                 | 153.23                 | 154.52                 | 154.36                 | 161.42                                          |
| 166.49         | 169.01                                            | 173.61                 | 175.21                 | 172.25                 | 172.22                 | 168.95                                          |
| 178.95         | 178.72                                            | 177.06                 | 177.82                 | 177.37                 | 176.90                 | 178.64                                          |
| 204.05         | 205.27                                            | 210.08                 | 196.91                 | 202.15                 | 202.13                 | 205.28                                          |
| 229.79         | 223.34                                            | 213.75                 | 210.80                 | 227.50                 | 227.85                 | 222.70                                          |
| 248.69         | 241.50                                            | 257.74                 | 232.40                 | 230.33                 | 230.55                 | 241.54                                          |
| 258.66         | 270.17                                            | 268.53                 | 258.45                 | 253.19                 | 253.49                 | 270.08                                          |
| 284.55         | 286.54                                            | 279.71                 | 261.56                 | 282.10                 | 282.30                 | 286.44                                          |
| 292.66         | 293.34                                            | 295.36                 | 292.23                 | 285.40                 | 285.66                 | 293.18                                          |
| 295.08         | 297.10                                            | 301.41                 | 297.91                 | 295.87                 | 295.50                 | 296.91                                          |
| 336.82         | 316.68                                            | 317.16                 | 318.82                 | 316.93                 | 316.69                 | 316.50                                          |
| 372.52         | 368.34                                            | 373.08                 | 366.82                 | 364.82                 | 364.62                 | 368.20                                          |
| 389.67         | 388.89                                            | 384.01                 | 385.39                 | 382.99                 | 382.91                 | 388.73                                          |
| 417.23         | 409.20                                            | 415.64                 | 391.93                 | 393.44                 | 393.50                 | 409.07                                          |
| 417.49         | 414.52                                            | 417.11                 | 415.23                 | 416.70                 | 416.63                 | 414.46                                          |
| 426.30         | 415.10                                            | 417.53                 | 416.07                 | 417.10                 | 417.05                 | 415.08                                          |
| 436.47         | 422.21                                            | 425.52                 | 425.82                 | 422.61                 | 422.80                 | 422.22                                          |
| 453.76         | 458.32                                            | 438.35                 | 439.76                 | 452.09                 | 452.18                 | 458.28                                          |
| 458.70         | 464.86                                            | 444.55                 | 447.88                 | 456.23                 | 456.33                 | 464.31                                          |
| 478.44         | 482.81                                            | 469.63                 | 455.81                 | 460.65                 | 460.97                 | 482.59                                          |
| 482.30         | 482.97                                            | 479.85                 | 479.90                 | 475.60                 | 475.52                 | 482.87                                          |
| 483.10         | 503.48                                            | 483.01                 | 481.20                 | 481.19                 | 481.38                 | 503.34                                          |
| 489.15         | 517.60                                            | 490.04                 | 492.66                 | 485.68                 | 485.65                 | 517.55                                          |

| molecule-1     |                                                   |                        |                        |                        |                        |                                                 |
|----------------|---------------------------------------------------|------------------------|------------------------|------------------------|------------------------|-------------------------------------------------|
| $\omega_{S_0}$ | $\omega_{S_{CT-Naph}}$<br>( $\phi = 90.2^\circ$ ) | $\omega_{S_{CT-Phen}}$ | $\omega_{T_{CT-Phen}}$ | $\omega_{T_{CT-Naph}}$ | $\omega_{T_{LE-Naph}}$ | $\omega_{S_{CT-Naph}}$<br>( $\phi = 88^\circ$ ) |
| 522.05         | 520.20                                            | 503.94                 | 502.01                 | 505.84                 | 505.75                 | 520.19                                          |
| 525.23         | 522.03                                            | 523.25                 | 526.22                 | 510.77                 | 510.85                 | 521.97                                          |
| 542.69         | 524.16                                            | 529.62                 | 530.60                 | 519.91                 | 519.90                 | 524.19                                          |
| 551.47         | 542.85                                            | 543.68                 | 544.61                 | 532.59                 | 532.41                 | 542.77                                          |
| 556.67         | 579.20                                            | 570.66                 | 552.34                 | 542.85                 | 542.78                 | 579.06                                          |
| 601.68         | 582.45                                            | 572.28                 | 564.62                 | 564.64                 | 564.59                 | 582.48                                          |
| 621.26         | 612.67                                            | 594.89                 | 595.76                 | 605.88                 | 605.84                 | 612.55                                          |
| 623.59         | 615.19                                            | 607.38                 | 609.27                 | 609.32                 | 609.27                 | 615.19                                          |
| 627.41         | 626.46                                            | 621.27                 | 614.32                 | 624.55                 | 624.45                 | 626.34                                          |
| 630.40         | 630.77                                            | 622.77                 | 622.59                 | 628.56                 | 628.53                 | 630.68                                          |
| 637.92         | 635.36                                            | 631.25                 | 625.66                 | 633.88                 | 633.84                 | 635.24                                          |
| 640.51         | 639.78                                            | 635.29                 | 629.10                 | 640.08                 | 639.99                 | 639.72                                          |
| 666.74         | 649.56                                            | 654.73                 | 636.11                 | 642.00                 | 641.99                 | 649.58                                          |
| 675.41         | 664.09                                            | 657.74                 | 650.85                 | 664.68                 | 664.69                 | 664.04                                          |
| 689.67         | 680.70                                            | 664.20                 | 668.17                 | 673.65                 | 673.64                 | 680.65                                          |
| 702.19         | 685.77                                            | 688.26                 | 670.81                 | 680.93                 | 681.49                 | 686.01                                          |
| 713.06         | 710.08                                            | 693.90                 | 686.70                 | 706.66                 | 706.80                 | 709.97                                          |
| 713.13         | 710.34                                            | 694.09                 | 702.48                 | 712.32                 | 712.57                 | 710.32                                          |
| 720.68         | 718.74                                            | 714.41                 | 703.90                 | 712.77                 | 712.75                 | 718.77                                          |
| 728.04         | 721.51                                            | 716.18                 | 709.79                 | 714.13                 | 714.25                 | 721.33                                          |
| 745.29         | 725.03                                            | 737.57                 | 714.50                 | 723.80                 | 723.70                 | 724.98                                          |
| 751.71         | 740.17                                            | 748.43                 | 733.15                 | 728.27                 | 728.30                 | 740.00                                          |
| 775.15         | 747.03                                            | 754.67                 | 750.15                 | 740.29                 | 740.57                 | 746.99                                          |
| 777.08         | 752.89                                            | 757.89                 | 755.70                 | 745.36                 | 745.38                 | 752.99                                          |
| 793.64         | 757.22                                            | 783.67                 | 773.22                 | 760.48                 | 760.75                 | 757.47                                          |
| 794.69         | 778.10                                            | 788.40                 | 788.45                 | 774.07                 | 774.08                 | 778.06                                          |
| 806.03         | 780.42                                            | 790.88                 | 791.11                 | 777.78                 | 777.83                 | 780.39                                          |
| 819.29         | 787.32                                            | 794.73                 | 796.22                 | 786.89                 | 786.91                 | 787.29                                          |
| 827.52         | 798.44                                            | 804.74                 | 804.90                 | 797.64                 | 797.70                 | 798.44                                          |
| 828.89         | 813.39                                            | 813.02                 | 814.61                 | 820.04                 | 820.56                 | 813.39                                          |
| 858.22         | 837.57                                            | 829.76                 | 816.44                 | 830.55                 | 830.34                 | 837.76                                          |
| 858.69         | 843.51                                            | 831.07                 | 834.01                 | 831.50                 | 831.43                 | 843.48                                          |
| 870.22         | 844.67                                            | 863.63                 | 852.05                 | 855.73                 | 855.94                 | 844.43                                          |
| 879.16         | 858.49                                            | 869.91                 | 852.88                 | 858.45                 | 858.75                 | 858.31                                          |
| 882.02         | 858.75                                            | 874.78                 | 855.83                 | 858.52                 | 858.83                 | 858.68                                          |
| 882.60         | 861.77                                            | 876.07                 | 874.84                 | 861.68                 | 861.72                 | 861.72                                          |
| 917.90         | 891.64                                            | 893.65                 | 886.72                 | 879.80                 | 880.24                 | 891.26                                          |
| 933.47         | 893.43                                            | 894.47                 | 900.98                 | 882.89                 | 883.17                 | 893.09                                          |
| 933.99         | 904.27                                            | 901.18                 | 924.66                 | 904.45                 | 904.47                 | 904.51                                          |
| 936.24         | 913.68                                            | 930.65                 | 929.96                 | 913.65                 | 913.69                 | 913.59                                          |



| molecule-1     |                                                   |                        |                        |                        |                        |                                                 |
|----------------|---------------------------------------------------|------------------------|------------------------|------------------------|------------------------|-------------------------------------------------|
| $\omega_{S_0}$ | $\omega_{S_{CT-Naph}}$<br>( $\phi = 90.2^\circ$ ) | $\omega_{S_{CT-Phen}}$ | $\omega_{T_{CT-Phen}}$ | $\omega_{T_{CT-Naph}}$ | $\omega_{T_{LE-Naph}}$ | $\omega_{S_{CT-Naph}}$<br>( $\phi = 88^\circ$ ) |
| 943.77         | 916.98                                            | 932.11                 | 932.49                 | 931.37                 | 930.96                 | 917.05                                          |
| 950.88         | 928.36                                            | 939.20                 | 938.71                 | 935.66                 | 935.67                 | 928.39                                          |
| 950.99         | 944.31                                            | 949.37                 | 946.36                 | 937.62                 | 937.87                 | 944.18                                          |
| 960.18         | 945.63                                            | 949.86                 | 961.39                 | 938.13                 | 938.40                 | 945.49                                          |
| 980.42         | 958.84                                            | 976.36                 | 964.39                 | 950.03                 | 949.81                 | 958.74                                          |
| 989.13         | 987.39                                            | 976.52                 | 964.98                 | 953.71                 | 953.75                 | 987.51                                          |
| 989.46         | 988.51                                            | 977.88                 | 976.74                 | 959.87                 | 959.54                 | 988.28                                          |
| 1000.8         | 994.12                                            | 988.96                 | 979.03                 | 961.26                 | 960.50                 | 994.00                                          |
| 1008.21        | 994.41                                            | 989.09                 | 988.86                 | 990.28                 | 990.42                 | 994.40                                          |
| 1008.29        | 1013.42                                           | 990.52                 | 990.26                 | 990.55                 | 990.75                 | 1013.36                                         |
| 1010.69        | 1013.64                                           | 996.51                 | 1001.57                | 1004.86                | 1004.55                | 1013.58                                         |
| 1012.31        | 1016.03                                           | 1000.57                | 1007.34                | 1009.92                | 1010.02                | 1015.99                                         |
| 1012.71        | 1016.06                                           | 1009.60                | 1010.55                | 1010.28                | 1010.40                | 1016.01                                         |
| 1036.92        | 1021.05                                           | 1019.71                | 1011.30                | 1012.66                | 1012.69                | 1021.05                                         |
| 1041.04        | 1038.73                                           | 1022.69                | 1029.14                | 1013.02                | 1013.04                | 1038.57                                         |
| 1044.81        | 1041.24                                           | 1041.12                | 1036.38                | 1040.33                | 1040.34                | 1041.03                                         |
| 1059.70        | 1052.72                                           | 1041.38                | 1038.45                | 1044.68                | 1044.68                | 1052.73                                         |
| 1067.51        | 1061.26                                           | 1044.72                | 1055.99                | 1057.32                | 1057.23                | 1061.06                                         |
| 1067.92        | 1062.43                                           | 1061.97                | 1060.65                | 1065.59                | 1065.65                | 1062.24                                         |
| 1096.56        | 1076.27                                           | 1093.12                | 1092.20                | 1067.69                | 1067.66                | 1076.27                                         |
| 1101.93        | 1100.28                                           | 1104.27                | 1097.10                | 1068.72                | 1068.93                | 1100.38                                         |
| 1102.21        | 1106.70                                           | 1104.63                | 1103.93                | 1102.88                | 1102.75                | 1106.59                                         |
| 1136.04        | 1107.08                                           | 1155.14                | 1141.39                | 1103.06                | 1103.13                | 1107.02                                         |
| 1158.45        | 1150.04                                           | 1165.97                | 1149.65                | 1138.61                | 1138.58                | 1150.20                                         |
| 1167.58        | 1154.70                                           | 1171.84                | 1164.28                | 1139.91                | 1140.03                | 1154.94                                         |
| 1176.51        | 1162.44                                           | 1172.06                | 1168.83                | 1150.42                | 1150.55                | 1162.50                                         |
| 1176.80        | 1173.23                                           | 1174.23                | 1170.77                | 1165.80                | 1165.47                | 1173.26                                         |
| 1176.92        | 1179.90                                           | 1174.62                | 1176.81                | 1177.02                | 1176.98                | 1179.94                                         |
| 1188.41        | 1180.54                                           | 1181.21                | 1180.51                | 1177.68                | 1177.86                | 1180.36                                         |
| 1190.74        | 1196.10                                           | 1186.64                | 1184.99                | 1192.53                | 1192.72                | 1196.12                                         |
| 1200.90        | 1200.48                                           | 1195.07                | 1193.68                | 1197.02                | 1196.95                | 1200.45                                         |
| 1202.42        | 1204.83                                           | 1210.43                | 1202.02                | 1201.30                | 1201.25                | 1204.74                                         |
| 1212.92        | 1206.27                                           | 1212.69                | 1209.70                | 1202.82                | 1202.91                | 1206.17                                         |
| 1231.32        | 1207.65                                           | 1227.73                | 1231.25                | 1204.61                | 1204.60                | 1207.42                                         |
| 1241.30        | 1224.59                                           | 1237.64                | 1237.82                | 1219.35                | 1219.43                | 1224.53                                         |
| 1256.96        | 1255.86                                           | 1243.86                | 1245.58                | 1254.47                | 1254.68                | 1255.33                                         |
| 1277.88        | 1270.65                                           | 1281.83                | 1258.08                | 1264.07                | 1263.93                | 1270.39                                         |
| 1283.90        | 1285.67                                           | 1282.43                | 1279.49                | 1271.62                | 1271.85                | 1285.64                                         |

| molecule-1     |                                                   |                        |                        |                        |                        |                                                 |
|----------------|---------------------------------------------------|------------------------|------------------------|------------------------|------------------------|-------------------------------------------------|
| $\omega_{S_0}$ | $\omega_{S_{CT-Naph}}$<br>( $\phi = 90.2^\circ$ ) | $\omega_{S_{CT-Phen}}$ | $\omega_{T_{CT-Phen}}$ | $\omega_{T_{CT-Naph}}$ | $\omega_{T_{LE-Naph}}$ | $\omega_{S_{CT-Naph}}$<br>( $\phi = 88^\circ$ ) |
| 1290.63        | 1292.38                                           | 1287.35                | 1286.42                | 1286.68                | 1286.85                | 1292.30                                         |
| 1302.25        | 1300.18                                           | 1303.96                | 1295.20                | 1294.50                | 1294.38                | 1300.09                                         |
| 1313.13        | 1302.85                                           | 1318.68                | 1315.94                | 1302.73                | 1302.68                | 1302.85                                         |
| 1315.53        | 1316.81                                           | 1328.93                | 1322.79                | 1311.84                | 1312.07                | 1316.72                                         |
| 1324.04        | 1326.63                                           | 1332.80                | 1333.60                | 1317.97                | 1318.01                | 1326.63                                         |
| 1333.25        | 1329.48                                           | 1339.01                | 1341.65                | 1321.60                | 1321.60                | 1329.44                                         |
| 1339.28        | 1351.19                                           | 1353.57                | 1348.83                | 1325.24                | 1325.33                | 1351.16                                         |
| 1351.91        | 1353.06                                           | 1354.92                | 1357.64                | 1331.19                | 1331.30                | 1352.92                                         |
| 1361.19        | 1358.01                                           | 1373.40                | 1371.10                | 1340.19                | 1340.25                | 1358.14                                         |
| 1361.26        | 1359.33                                           | 1375.77                | 1374.10                | 1345.24                | 1345.17                | 1359.33                                         |
| 1367.61        | 1367.13                                           | 1380.98                | 1387.68                | 1358.15                | 1358.01                | 1367.18                                         |
| 1390.89        | 1371.85                                           | 1414.76                | 1391.33                | 1360.98                | 1360.91                | 1371.85                                         |
| 1419.67        | 1391.11                                           | 1426.17                | 1398.55                | 1411.43                | 1411.20                | 1391.06                                         |
| 1431.74        | 1425.18                                           | 1435.59                | 1420.50                | 1428.18                | 1428.28                | 1425.24                                         |
| 1454.29        | 1441.98                                           | 1446.64                | 1448.67                | 1432.31                | 1432.33                | 1441.91                                         |
| 1468.01        | 1447.11                                           | 1459.62                | 1462.26                | 1437.48                | 1437.52                | 1447.24                                         |
| 1477.64        | 1461.19                                           | 1478.07                | 1469.55                | 1453.80                | 1453.89                | 1461.17                                         |
| 1484.12        | 1468.94                                           | 1486.49                | 1471.77                | 1464.38                | 1464.64                | 1468.81                                         |
| 1495.18        | 1475.81                                           | 1488.41                | 1482.30                | 1472.25                | 1472.00                | 1475.74                                         |
| 1510.94        | 1480.40                                           | 1492.52                | 1490.18                | 1477.89                | 1477.92                | 1480.37                                         |
| 1521.06        | 1492.15                                           | 1498.40                | 1494.85                | 1485.76                | 1485.80                | 1492.11                                         |
| 1536.81        | 1515.16                                           | 1503.75                | 1505.48                | 1504.69                | 1504.81                | 1515.13                                         |
| 1542.02        | 1529.99                                           | 1513.75                | 1530.32                | 1515.88                | 1515.92                | 1529.95                                         |
| 1551.52        | 1532.85                                           | 1519.77                | 1534.92                | 1525.85                | 1525.98                | 1532.90                                         |
| 1582.13        | 1536.87                                           | 1532.00                | 1540.95                | 1533.32                | 1533.33                | 1536.84                                         |
| 1609.65        | 1539.23                                           | 1542.84                | 1543.08                | 1541.24                | 1541.27                | 1539.23                                         |
| 1610.55        | 1554.08                                           | 1573.88                | 1556.41                | 1563.68                | 1563.76                | 1554.02                                         |
| 1614.94        | 1597.79                                           | 1574.38                | 1592.03                | 1576.21                | 1576.18                | 1597.72                                         |
| 1628.81        | 1599.42                                           | 1592.97                | 1596.93                | 1608.49                | 1608.50                | 1599.44                                         |
| 1628.99        | 1613.20                                           | 1611.71                | 1609.35                | 1615.34                | 1615.32                | 1613.15                                         |
| 1635.69        | 1616.87                                           | 1629.92                | 1610.15                | 1623.34                | 1623.43                | 1616.84                                         |
| 1638.09        | 1617.91                                           | 1632.51                | 1634.32                | 1624.28                | 1624.30                | 1617.89                                         |
| 1640.41        | 1635.67                                           | 1639.57                | 1637.16                | 1637.47                | 1637.53                | 1635.65                                         |
| 1661.51        | 1638.62                                           | 1654.66                | 1651.32                | 1639.47                | 1639.47                | 1638.60                                         |
| 1668.33        | 1658.05                                           | 1830.03                | 1662.10                | 1659.89                | 1659.97                | 1658.00                                         |
| 3162.35        | 3140.82                                           | 3157.95                | 3154.86                | 3163.40                | 3163.54                | 3140.89                                         |
| 3162.39        | 3149.38                                           | 3158.41                | 3159.15                | 3163.82                | 3163.96                | 3149.42                                         |
| 3166.68        | 3152.15                                           | 3163.22                | 3163.76                | 3164.28                | 3164.21                | 3152.17                                         |
| 3167.78        | 3164.05                                           | 3163.35                | 3169.38                | 3169.40                | 3169.59                | 3164.11                                         |
| 3167.97        | 3165.26                                           | 3169.74                | 3169.49                | 3169.91                | 3169.83                | 3165.33                                         |

| molecule-1     |                                                   |                        |                        |                        |                        |                                                 |
|----------------|---------------------------------------------------|------------------------|------------------------|------------------------|------------------------|-------------------------------------------------|
| $\omega_{S_0}$ | $\omega_{S_{CT-Naph}}$<br>( $\phi = 90.2^\circ$ ) | $\omega_{S_{CT-Phen}}$ | $\omega_{T_{CT-Phen}}$ | $\omega_{T_{CT-Naph}}$ | $\omega_{T_{LE-Naph}}$ | $\omega_{S_{CT-Naph}}$<br>( $\phi = 88^\circ$ ) |
| 3170.24        | 3169.59                                           | 3174.32                | 3173.89                | 3169.99                | 3170.23                | 3169.58                                         |
| 3175.57        | 3169.67                                           | 3177.90                | 3178.10                | 3171.98                | 3172.14                | 3169.60                                         |
| 3176.84        | 3175.68                                           | 3180.17                | 3179.28                | 3178.12                | 3178.36                | 3175.54                                         |
| 3177.08        | 3175.68                                           | 3180.88                | 3183.91                | 3178.65                | 3178.52                | 3175.70                                         |
| 3181.52        | 3178.02                                           | 3184.78                | 3183.91                | 3181.30                | 3181.45                | 3178.06                                         |
| 3181.75        | 3183.27                                           | 3185.34                | 3188.39                | 3183.34                | 3183.45                | 3183.13                                         |
| 3183.24        | 3183.28                                           | 3189.79                | 3189.97                | 3183.79                | 3183.67                | 3183.29                                         |
| 3185.71        | 3184.61                                           | 3190.33                | 3190.59                | 3184.88                | 3185.03                | 3184.68                                         |
| 3185.92        | 3189.26                                           | 3190.67                | 3191.54                | 3189.94                | 3189.90                | 3189.13                                         |
| 3188.30        | 3189.33                                           | 3191.06                | 3194.02                | 3190.35                | 3190.04                | 3189.36                                         |
| 3190.59        | 3196.47                                           | 3199.03                | 3194.29                | 3192.34                | 3192.53                | 3196.45                                         |
| 3190.66        | 3196.55                                           | 3200.68                | 3197.86                | 3192.64                | 3192.56                | 3196.50                                         |
| 3192.26        | 3203.96                                           | 3200.94                | 3199.71                | 3193.97                | 3194.22                | 3203.98                                         |
| 3192.55        | 3204.31                                           | 3201.47                | 3200.19                | 3195.45                | 3195.78                | 3204.35                                         |
| 3195.54        | 3209.72                                           | 3203.52                | 3200.54                | 3196.34                | 3196.13                | 3209.48                                         |
| 3199.53        | 3210.15                                           | 3204.19                | 3211.48                | 3198.03                | 3198.10                | 3210.02                                         |
| 3206.06        | 3230.51                                           | 3214.19                | 3212.66                | 3211.96                | 3211.99                | 3230.40                                         |
| 3206.50        | 3231.07                                           | 3214.95                | 3223.46                | 3222.43                | 3222.30                | 3230.95                                         |

| molecule-1                                      |                                                 |                                                 |                                                 |                                                 |                                                 |                                                 |
|-------------------------------------------------|-------------------------------------------------|-------------------------------------------------|-------------------------------------------------|-------------------------------------------------|-------------------------------------------------|-------------------------------------------------|
| $\omega_{S_{CT-Naph}}$<br>( $\phi = 84^\circ$ ) | $\omega_{S_{CT-Naph}}$<br>( $\phi = 80^\circ$ ) | $\omega_{S_{CT-Naph}}$<br>( $\phi = 76^\circ$ ) | $\omega_{S_{CT-Naph}}$<br>( $\phi = 72^\circ$ ) | $\omega_{S_{CT-Naph}}$<br>( $\phi = 68^\circ$ ) | $\omega_{S_{CT-Naph}}$<br>( $\phi = 64^\circ$ ) | $\omega_{S_{CT-Naph}}$<br>( $\phi = 60^\circ$ ) |
| 19.45                                           | 19.74                                           | 20.41                                           | 22.59                                           | 23.41                                           | 22.57                                           | 20.68                                           |
| 22.39                                           | 22.34                                           | 23.22                                           | 24.75                                           | 26.84                                           | 26.97                                           | 24.55                                           |
| 30.14                                           | 30.52                                           | 31.56                                           | 32.34                                           | 33.34                                           | 33.31                                           | 32.46                                           |
| 37.92                                           | 38.16                                           | 38.91                                           | 40.66                                           | 42.05                                           | 42.21                                           | 42.23                                           |
| 40.73                                           | 41.59                                           | 43.04                                           | 45.22                                           | 47.54                                           | 48.82                                           | 49.20                                           |
| 49.23                                           | 49.42                                           | 49.55                                           | 49.99                                           | 50.24                                           | 50.29                                           | 50.47                                           |
| 55.37                                           | 55.92                                           | 57.88                                           | 61.50                                           | 63.71                                           | 66.83                                           | 69.88                                           |
| 67.30                                           | 67.50                                           | 68.73                                           | 70.33                                           | 71.60                                           | 71.87                                           | 72.00                                           |
| 89.09                                           | 89.75                                           | 91.48                                           | 93.16                                           | 94.35                                           | 94.72                                           | 94.42                                           |
| 95.40                                           | 95.67                                           | 96.00                                           | 97.08                                           | 98.87                                           | 100.77                                          | 102.32                                          |
| 128.12                                          | 128.63                                          | 129.63                                          | 131.98                                          | 134.70                                          | 136.90                                          | 137.58                                          |
| 136.78                                          | 137.32                                          | 139.41                                          | 141.76                                          | 144.81                                          | 147.58                                          | 149.66                                          |
| 161.80                                          | 162.43                                          | 164.14                                          | 166.32                                          | 168.16                                          | 169.25                                          | 169.75                                          |

| molecule-1                                          |                                                     |                                                     |                                                     |                                                     |                                                     |                                                     |
|-----------------------------------------------------|-----------------------------------------------------|-----------------------------------------------------|-----------------------------------------------------|-----------------------------------------------------|-----------------------------------------------------|-----------------------------------------------------|
| $\omega_{\text{SCT-Naph}}$<br>( $\phi = 84^\circ$ ) | $\omega_{\text{SCT-Naph}}$<br>( $\phi = 80^\circ$ ) | $\omega_{\text{SCT-Naph}}$<br>( $\phi = 76^\circ$ ) | $\omega_{\text{SCT-Naph}}$<br>( $\phi = 72^\circ$ ) | $\omega_{\text{SCT-Naph}}$<br>( $\phi = 68^\circ$ ) | $\omega_{\text{SCT-Naph}}$<br>( $\phi = 64^\circ$ ) | $\omega_{\text{SCT-Naph}}$<br>( $\phi = 60^\circ$ ) |
| 169.17                                              | 169.55                                              | 170.54                                              | 172.69                                              | 177.44                                              | 184.36                                              | 190.75                                              |
| 179.36                                              | 180.51                                              | 182.53                                              | 187.90                                              | 195.15                                              | 204.92                                              | 209.13                                              |
| 205.31                                              | 205.38                                              | 205.61                                              | 206.13                                              | 206.87                                              | 208.38                                              | 217.35                                              |
| 223.38                                              | 223.47                                              | 223.82                                              | 225.42                                              | 224.83                                              | 224.04                                              | 226.77                                              |
| 241.61                                              | 240.94                                              | 240.56                                              | 240.75                                              | 241.23                                              | 242.12                                              | 242.36                                              |
| 270.10                                              | 270.25                                              | 270.43                                              | 270.66                                              | 270.72                                              | 270.55                                              | 270.36                                              |
| 286.56                                              | 286.61                                              | 286.86                                              | 288.26                                              | 289.29                                              | 290.72                                              | 292.10                                              |
| 293.40                                              | 293.06                                              | 292.70                                              | 293.00                                              | 292.97                                              | 293.17                                              | 293.49                                              |
| 296.70                                              | 296.71                                              | 297.07                                              | 297.73                                              | 298.23                                              | 298.61                                              | 299.01                                              |
| 316.64                                              | 316.57                                              | 317.04                                              | 318.17                                              | 319.23                                              | 321.20                                              | 323.61                                              |
| 368.29                                              | 368.04                                              | 368.18                                              | 369.17                                              | 370.11                                              | 371.45                                              | 373.96                                              |
| 388.52                                              | 388.28                                              | 388.23                                              | 388.38                                              | 388.62                                              | 389.42                                              | 390.21                                              |
| 408.70                                              | 407.96                                              | 407.43                                              | 406.90                                              | 406.43                                              | 406.16                                              | 405.96                                              |
| 414.53                                              | 414.54                                              | 414.64                                              | 414.80                                              | 414.96                                              | 414.58                                              | 414.62                                              |
| 414.73                                              | 414.64                                              | 414.79                                              | 415.13                                              | 415.11                                              | 414.89                                              | 414.79                                              |
| 422.28                                              | 422.62                                              | 423.09                                              | 423.66                                              | 424.49                                              | 425.46                                              | 426.27                                              |
| 458.23                                              | 458.15                                              | 458.64                                              | 459.02                                              | 459.34                                              | 459.81                                              | 460.63                                              |
| 464.62                                              | 464.53                                              | 465.19                                              | 466.37                                              | 466.56                                              | 468.34                                              | 471.27                                              |
| 482.72                                              | 482.82                                              | 483.01                                              | 483.52                                              | 483.83                                              | 483.94                                              | 484.08                                              |
| 482.88                                              | 482.99                                              | 483.51                                              | 484.34                                              | 485.14                                              | 486.64                                              | 490.40                                              |
| 502.75                                              | 501.88                                              | 500.76                                              | 499.75                                              | 499.01                                              | 498.73                                              | 498.71                                              |
| 517.46                                              | 517.38                                              | 517.35                                              | 517.39                                              | 517.42                                              | 517.33                                              | 517.25                                              |
| 520.55                                              | 520.63                                              | 520.67                                              | 521.16                                              | 521.70                                              | 522.63                                              | 523.83                                              |
| 521.87                                              | 521.84                                              | 522.41                                              | 523.42                                              | 523.87                                              | 524.04                                              | 524.04                                              |
| 524.18                                              | 524.14                                              | 524.23                                              | 524.55                                              | 525.78                                              | 527.68                                              | 529.94                                              |
| 542.69                                              | 542.78                                              | 542.87                                              | 543.17                                              | 543.33                                              | 543.34                                              | 543.34                                              |
| 578.36                                              | 577.25                                              | 575.86                                              | 574.25                                              | 572.52                                              | 570.93                                              | 569.08                                              |
| 582.78                                              | 583.15                                              | 583.77                                              | 584.68                                              | 585.64                                              | 586.74                                              | 587.92                                              |
| 612.25                                              | 611.78                                              | 611.23                                              | 610.87                                              | 610.52                                              | 610.29                                              | 609.95                                              |
| 615.15                                              | 615.06                                              | 615.10                                              | 615.13                                              | 615.14                                              | 615.18                                              | 615.26                                              |
| 626.42                                              | 626.25                                              | 626.05                                              | 625.93                                              | 625.51                                              | 625.27                                              | 625.51                                              |
| 630.65                                              | 630.73                                              | 630.80                                              | 630.90                                              | 630.93                                              | 630.88                                              | 630.83                                              |
| 635.10                                              | 634.80                                              | 634.53                                              | 634.36                                              | 634.18                                              | 634.22                                              | 634.50                                              |
| 639.75                                              | 639.67                                              | 639.59                                              | 639.55                                              | 639.45                                              | 639.48                                              | 639.69                                              |
| 649.48                                              | 649.21                                              | 649.07                                              | 648.83                                              | 648.40                                              | 648.10                                              | 647.84                                              |
| 664.01                                              | 664.05                                              | 664.14                                              | 664.31                                              | 664.44                                              | 664.54                                              | 664.64                                              |

| molecule-1                                          |                                                     |                                                     |                                                     |                                                     |                                                     |                                                     |
|-----------------------------------------------------|-----------------------------------------------------|-----------------------------------------------------|-----------------------------------------------------|-----------------------------------------------------|-----------------------------------------------------|-----------------------------------------------------|
| $\omega_{\text{SCT-Naph}}$<br>( $\phi = 84^\circ$ ) | $\omega_{\text{SCT-Naph}}$<br>( $\phi = 80^\circ$ ) | $\omega_{\text{SCT-Naph}}$<br>( $\phi = 76^\circ$ ) | $\omega_{\text{SCT-Naph}}$<br>( $\phi = 72^\circ$ ) | $\omega_{\text{SCT-Naph}}$<br>( $\phi = 68^\circ$ ) | $\omega_{\text{SCT-Naph}}$<br>( $\phi = 64^\circ$ ) | $\omega_{\text{SCT-Naph}}$<br>( $\phi = 60^\circ$ ) |
| 680.62                                              | 680.52                                              | 680.46                                              | 680.46                                              | 680.33                                              | 680.25                                              | 680.16                                              |
| 686.88                                              | 687.48                                              | 687.87                                              | 689.66                                              | 692.18                                              | 696.11                                              | 700.32                                              |
| 709.89                                              | 709.88                                              | 709.99                                              | 710.18                                              | 710.21                                              | 709.74                                              | 709.62                                              |
| 709.99                                              | 709.97                                              | 710.04                                              | 710.27                                              | 710.39                                              | 710.25                                              | 710.16                                              |
| 719.12                                              | 719.05                                              | 718.95                                              | 718.35                                              | 717.19                                              | 716.35                                              | 716.20                                              |
| 721.60                                              | 721.60                                              | 721.49                                              | 722.91                                              | 724.21                                              | 724.78                                              | 724.90                                              |
| 724.95                                              | 725.01                                              | 725.14                                              | 725.48                                              | 726.50                                              | 729.47                                              | 733.16                                              |
| 739.74                                              | 739.53                                              | 739.58                                              | 739.28                                              | 738.50                                              | 738.22                                              | 738.22                                              |
| 746.94                                              | 746.84                                              | 746.76                                              | 746.65                                              | 746.47                                              | 746.31                                              | 746.10                                              |
| 753.46                                              | 754.14                                              | 754.88                                              | 756.01                                              | 757.83                                              | 760.73                                              | 764.31                                              |
| 758.66                                              | 759.64                                              | 760.90                                              | 764.35                                              | 768.88                                              | 775.03                                              | 776.64                                              |
| 778.02                                              | 777.87                                              | 777.71                                              | 777.65                                              | 777.51                                              | 777.42                                              | 779.31                                              |
| 780.31                                              | 780.19                                              | 780.08                                              | 779.93                                              | 779.74                                              | 779.52                                              | 781.98                                              |
| 787.28                                              | 787.25                                              | 787.32                                              | 787.57                                              | 787.83                                              | 788.33                                              | 789.18                                              |
| 798.47                                              | 798.44                                              | 798.50                                              | 798.61                                              | 798.74                                              | 798.97                                              | 799.19                                              |
| 813.73                                              | 813.84                                              | 814.18                                              | 815.72                                              | 817.93                                              | 820.95                                              | 823.87                                              |
| 838.39                                              | 838.86                                              | 839.47                                              | 839.62                                              | 838.62                                              | 837.59                                              | 836.75                                              |
| 843.12                                              | 841.81                                              | 841.35                                              | 841.01                                              | 841.80                                              | 843.27                                              | 845.21                                              |
| 843.98                                              | 843.33                                              | 843.09                                              | 842.62                                              | 844.07                                              | 847.70                                              | 852.09                                              |
| 858.01                                              | 857.95                                              | 858.12                                              | 858.38                                              | 858.50                                              | 857.85                                              | 857.51                                              |
| 858.30                                              | 858.32                                              | 858.46                                              | 858.64                                              | 858.65                                              | 858.59                                              | 858.48                                              |
| 861.81                                              | 862.00                                              | 862.37                                              | 863.05                                              | 863.68                                              | 864.41                                              | 865.13                                              |
| 890.30                                              | 889.58                                              | 889.08                                              | 888.46                                              | 886.28                                              | 883.12                                              | 879.29                                              |
| 892.18                                              | 891.37                                              | 890.90                                              | 890.49                                              | 890.38                                              | 889.22                                              | 888.36                                              |
| 905.12                                              | 905.55                                              | 906.05                                              | 907.37                                              | 908.79                                              | 909.70                                              | 910.04                                              |
| 913.15                                              | 912.63                                              | 912.25                                              | 912.27                                              | 912.88                                              | 915.03                                              | 918.75                                              |
| 917.55                                              | 918.31                                              | 919.19                                              | 920.09                                              | 920.90                                              | 921.59                                              | 922.13                                              |
| 928.74                                              | 929.31                                              | 930.14                                              | 931.24                                              | 932.29                                              | 933.44                                              | 934.82                                              |
| 943.86                                              | 943.70                                              | 943.70                                              | 943.84                                              | 943.89                                              | 943.32                                              | 942.82                                              |
| 945.13                                              | 945.09                                              | 945.17                                              | 945.31                                              | 945.12                                              | 944.43                                              | 943.97                                              |
| 958.66                                              | 958.80                                              | 958.97                                              | 959.13                                              | 959.21                                              | 959.25                                              | 959.19                                              |
| 987.08                                              | 985.20                                              | 984.03                                              | 981.99                                              | 980.38                                              | 978.53                                              | 976.55                                              |
| 987.70                                              | 987.09                                              | 986.63                                              | 985.64                                              | 984.88                                              | 985.59                                              | 986.67                                              |
| 993.77                                              | 993.69                                              | 993.79                                              | 993.89                                              | 993.79                                              | 993.24                                              | 992.96                                              |
| 994.10                                              | 993.99                                              | 993.99                                              | 994.01                                              | 993.97                                              | 993.82                                              | 993.65                                              |
| 1013.31                                             | 1013.39                                             | 1013.42                                             | 1013.46                                             | 1013.49                                             | 1013.44                                             | 1013.33                                             |
| 1013.53                                             | 1013.61                                             | 1013.63                                             | 1013.68                                             | 1013.68                                             | 1013.62                                             | 1013.55                                             |
| 1015.87                                             | 1015.77                                             | 1015.71                                             | 1015.60                                             | 1015.24                                             | 1014.74                                             | 1014.34                                             |

| molecule-1                                          |                                                     |                                                     |                                                     |                                                     |                                                     |                                                     |
|-----------------------------------------------------|-----------------------------------------------------|-----------------------------------------------------|-----------------------------------------------------|-----------------------------------------------------|-----------------------------------------------------|-----------------------------------------------------|
| $\omega_{\text{SCT-Naph}}$<br>( $\phi = 84^\circ$ ) | $\omega_{\text{SCT-Naph}}$<br>( $\phi = 80^\circ$ ) | $\omega_{\text{SCT-Naph}}$<br>( $\phi = 76^\circ$ ) | $\omega_{\text{SCT-Naph}}$<br>( $\phi = 72^\circ$ ) | $\omega_{\text{SCT-Naph}}$<br>( $\phi = 68^\circ$ ) | $\omega_{\text{SCT-Naph}}$<br>( $\phi = 64^\circ$ ) | $\omega_{\text{SCT-Naph}}$<br>( $\phi = 60^\circ$ ) |
| 1015.89                                             | 1015.88                                             | 1015.79                                             | 1015.64                                             | 1015.54                                             | 1015.31                                             | 1015.08                                             |
| 1021.33                                             | 1021.60                                             | 1021.98                                             | 1022.63                                             | 1023.39                                             | 1024.24                                             | 1025.02                                             |
| 1038.48                                             | 1038.85                                             | 1039.22                                             | 1039.65                                             | 1039.98                                             | 1040.26                                             | 1040.58                                             |
| 1040.90                                             | 1041.38                                             | 1041.87                                             | 1042.44                                             | 1042.91                                             | 1043.31                                             | 1043.72                                             |
| 1053.14                                             | 1053.61                                             | 1054.15                                             | 1055.05                                             | 1056.10                                             | 1057.34                                             | 1058.43                                             |
| 1060.92                                             | 1061.27                                             | 1061.72                                             | 1062.20                                             | 1062.66                                             | 1062.98                                             | 1063.29                                             |
| 1062.16                                             | 1062.51                                             | 1062.95                                             | 1063.46                                             | 1064.04                                             | 1064.57                                             | 1065.21                                             |
| 1076.84                                             | 1077.27                                             | 1077.44                                             | 1078.63                                             | 1080.16                                             | 1082.45                                             | 1084.73                                             |
| 1100.66                                             | 1100.91                                             | 1101.21                                             | 1101.95                                             | 1103.18                                             | 1104.87                                             | 1106.27                                             |
| 1106.43                                             | 1106.41                                             | 1106.37                                             | 1106.66                                             | 1106.96                                             | 1106.68                                             | 1106.50                                             |
| 1106.66                                             | 1106.65                                             | 1106.83                                             | 1107.04                                             | 1107.22                                             | 1107.30                                             | 1107.04                                             |
| 1150.58                                             | 1151.03                                             | 1151.87                                             | 1153.09                                             | 1154.43                                             | 1156.14                                             | 1158.21                                             |
| 1155.51                                             | 1155.89                                             | 1156.29                                             | 1157.14                                             | 1158.05                                             | 1159.51                                             | 1161.23                                             |
| 1162.65                                             | 1162.72                                             | 1162.80                                             | 1163.08                                             | 1163.53                                             | 1164.36                                             | 1165.49                                             |
| 1173.74                                             | 1174.16                                             | 1174.60                                             | 1175.68                                             | 1176.86                                             | 1178.67                                             | 1179.24                                             |
| 1179.96                                             | 1179.85                                             | 1179.71                                             | 1179.68                                             | 1179.69                                             | 1179.74                                             | 1179.66                                             |
| 1180.10                                             | 1179.99                                             | 1179.85                                             | 1179.77                                             | 1179.84                                             | 1179.94                                             | 1181.17                                             |
| 1196.68                                             | 1197.15                                             | 1197.75                                             | 1199.03                                             | 1200.12                                             | 1201.10                                             | 1201.70                                             |
| 1200.62                                             | 1201.15                                             | 1201.90                                             | 1202.95                                             | 1204.10                                             | 1204.69                                             | 1204.31                                             |
| 1204.50                                             | 1204.61                                             | 1205.01                                             | 1205.71                                             | 1206.32                                             | 1206.67                                             | 1207.09                                             |
| 1206.06                                             | 1206.18                                             | 1206.58                                             | 1207.30                                             | 1208.35                                             | 1209.95                                             | 1212.61                                             |
| 1207.41                                             | 1208.13                                             | 1208.87                                             | 1210.19                                             | 1211.29                                             | 1212.75                                             | 1214.51                                             |
| 1224.65                                             | 1225.04                                             | 1225.41                                             | 1225.94                                             | 1226.61                                             | 1227.55                                             | 1228.54                                             |
| 1254.84                                             | 1255.80                                             | 1256.70                                             | 1257.63                                             | 1258.17                                             | 1258.55                                             | 1258.84                                             |
| 1271.06                                             | 1270.99                                             | 1270.69                                             | 1272.05                                             | 1273.46                                             | 1275.86                                             | 1278.02                                             |
| 1285.71                                             | 1285.99                                             | 1286.45                                             | 1287.22                                             | 1288.19                                             | 1289.38                                             | 1290.87                                             |
| 1292.43                                             | 1293.07                                             | 1293.95                                             | 1295.05                                             | 1295.86                                             | 1296.48                                             | 1296.76                                             |
| 1300.15                                             | 1300.30                                             | 1300.54                                             | 1301.15                                             | 1301.66                                             | 1302.37                                             | 1303.90                                             |
| 1302.85                                             | 1302.99                                             | 1303.25                                             | 1303.69                                             | 1304.13                                             | 1304.63                                             | 1305.24                                             |
| 1316.62                                             | 1316.66                                             | 1316.59                                             | 1316.44                                             | 1316.05                                             | 1315.49                                             | 1314.77                                             |
| 1326.67                                             | 1326.72                                             | 1326.82                                             | 1327.02                                             | 1327.22                                             | 1327.51                                             | 1327.90                                             |
| 1329.50                                             | 1329.60                                             | 1329.70                                             | 1329.85                                             | 1329.91                                             | 1330.01                                             | 1330.27                                             |
| 1351.23                                             | 1351.55                                             | 1351.65                                             | 1351.64                                             | 1351.51                                             | 1351.15                                             | 1350.64                                             |
| 1352.44                                             | 1352.07                                             | 1352.30                                             | 1352.90                                             | 1353.50                                             | 1353.78                                             | 1353.95                                             |
| 1358.80                                             | 1358.78                                             | 1358.50                                             | 1358.29                                             | 1358.22                                             | 1358.16                                             | 1357.99                                             |
| 1359.55                                             | 1360.65                                             | 1361.93                                             | 1362.98                                             | 1363.70                                             | 1364.14                                             | 1364.51                                             |
| 1367.52                                             | 1368.51                                             | 1370.25                                             | 1372.70                                             | 1375.23                                             | 1377.47                                             | 1379.37                                             |

| molecule-1                                          |                                                     |                                                     |                                                     |                                                     |                                                     |                                                     |
|-----------------------------------------------------|-----------------------------------------------------|-----------------------------------------------------|-----------------------------------------------------|-----------------------------------------------------|-----------------------------------------------------|-----------------------------------------------------|
| $\omega_{\text{SCT-Naph}}$<br>( $\phi = 84^\circ$ ) | $\omega_{\text{SCT-Naph}}$<br>( $\phi = 80^\circ$ ) | $\omega_{\text{SCT-Naph}}$<br>( $\phi = 76^\circ$ ) | $\omega_{\text{SCT-Naph}}$<br>( $\phi = 72^\circ$ ) | $\omega_{\text{SCT-Naph}}$<br>( $\phi = 68^\circ$ ) | $\omega_{\text{SCT-Naph}}$<br>( $\phi = 64^\circ$ ) | $\omega_{\text{SCT-Naph}}$<br>( $\phi = 60^\circ$ ) |
| 1372.11                                             | 1372.90                                             | 1374.10                                             | 1375.69                                             | 1377.82                                             | 1380.71                                             | 1383.72                                             |
| 1390.94                                             | 1390.83                                             | 1390.64                                             | 1390.37                                             | 1390.17                                             | 1390.12                                             | 1390.36                                             |
| 1425.61                                             | 1426.03                                             | 1426.55                                             | 1427.49                                             | 1428.76                                             | 1430.30                                             | 1431.51                                             |
| 1441.91                                             | 1442.06                                             | 1442.27                                             | 1442.67                                             | 1443.06                                             | 1443.53                                             | 1444.17                                             |
| 1447.56                                             | 1447.82                                             | 1448.16                                             | 1448.70                                             | 1449.38                                             | 1450.46                                             | 1451.84                                             |
| 1461.23                                             | 1461.25                                             | 1461.29                                             | 1461.40                                             | 1461.43                                             | 1461.51                                             | 1461.63                                             |
| 1469.46                                             | 1469.67                                             | 1469.72                                             | 1471.25                                             | 1473.05                                             | 1475.84                                             | 1477.98                                             |
| 1475.81                                             | 1476.18                                             | 1476.66                                             | 1477.25                                             | 1477.76                                             | 1478.20                                             | 1479.21                                             |
| 1480.37                                             | 1480.39                                             | 1480.48                                             | 1480.79                                             | 1481.24                                             | 1482.01                                             | 1483.44                                             |
| 1492.09                                             | 1492.05                                             | 1492.03                                             | 1492.09                                             | 1492.02                                             | 1491.89                                             | 1491.77                                             |
| 1515.19                                             | 1515.35                                             | 1515.61                                             | 1516.02                                             | 1516.41                                             | 1516.75                                             | 1517.24                                             |
| 1529.84                                             | 1529.84                                             | 1529.88                                             | 1529.98                                             | 1530.02                                             | 1529.88                                             | 1529.60                                             |
| 1533.42                                             | 1534.15                                             | 1535.05                                             | 1536.29                                             | 1537.28                                             | 1537.47                                             | 1537.64                                             |
| 1536.79                                             | 1536.89                                             | 1537.04                                             | 1537.27                                             | 1537.88                                             | 1539.10                                             | 1539.58                                             |
| 1539.39                                             | 1539.52                                             | 1539.61                                             | 1539.92                                             | 1540.32                                             | 1541.33                                             | 1542.98                                             |
| 1553.70                                             | 1553.18                                             | 1552.53                                             | 1551.83                                             | 1550.98                                             | 1550.23                                             | 1549.78                                             |
| 1597.47                                             | 1597.10                                             | 1596.55                                             | 1595.84                                             | 1594.96                                             | 1594.10                                             | 1593.28                                             |
| 1599.37                                             | 1599.17                                             | 1598.95                                             | 1598.79                                             | 1598.60                                             | 1598.37                                             | 1598.00                                             |
| 1613.04                                             | 1612.93                                             | 1612.70                                             | 1612.39                                             | 1611.88                                             | 1611.17                                             | 1610.28                                             |
| 1616.80                                             | 1616.71                                             | 1616.59                                             | 1616.48                                             | 1616.38                                             | 1616.16                                             | 1615.85                                             |
| 1617.78                                             | 1617.56                                             | 1617.24                                             | 1616.92                                             | 1616.61                                             | 1616.35                                             | 1616.13                                             |
| 1635.61                                             | 1635.59                                             | 1635.57                                             | 1635.52                                             | 1635.43                                             | 1635.25                                             | 1634.99                                             |
| 1638.56                                             | 1638.51                                             | 1638.47                                             | 1638.40                                             | 1638.33                                             | 1638.18                                             | 1637.96                                             |
| 1657.87                                             | 1657.63                                             | 1657.33                                             | 1657.05                                             | 1656.60                                             | 1656.10                                             | 1655.71                                             |
| 3141.00                                             | 3141.07                                             | 3141.19                                             | 3141.47                                             | 3141.87                                             | 3142.26                                             | 3142.56                                             |
| 3149.54                                             | 3149.72                                             | 3150.00                                             | 3150.37                                             | 3150.90                                             | 3151.45                                             | 3151.99                                             |
| 3152.23                                             | 3152.31                                             | 3152.53                                             | 3152.79                                             | 3153.19                                             | 3153.61                                             | 3153.95                                             |
| 3164.23                                             | 3164.35                                             | 3164.56                                             | 3164.91                                             | 3165.40                                             | 3165.89                                             | 3166.35                                             |
| 3165.42                                             | 3165.54                                             | 3165.87                                             | 3166.24                                             | 3166.84                                             | 3167.41                                             | 3167.79                                             |
| 3169.53                                             | 3169.60                                             | 3169.60                                             | 3169.58                                             | 3169.53                                             | 3169.41                                             | 3169.25                                             |
| 3169.56                                             | 3169.61                                             | 3169.61                                             | 3169.62                                             | 3169.54                                             | 3169.47                                             | 3169.46                                             |
| 3175.47                                             | 3175.49                                             | 3175.50                                             | 3175.62                                             | 3175.58                                             | 3175.53                                             | 3175.47                                             |
| 3175.62                                             | 3175.86                                             | 3175.95                                             | 3175.96                                             | 3175.92                                             | 3175.70                                             | 3175.56                                             |
| 3178.07                                             | 3178.14                                             | 3178.47                                             | 3178.84                                             | 3179.51                                             | 3180.11                                             | 3180.29                                             |

| molecule-1                                                    |                                                               |                                                               |                                                               |                                                               |                                                               |                                                               |
|---------------------------------------------------------------|---------------------------------------------------------------|---------------------------------------------------------------|---------------------------------------------------------------|---------------------------------------------------------------|---------------------------------------------------------------|---------------------------------------------------------------|
| $\omega_{\text{S}_{\text{CT-Naph}}}$<br>( $\phi = 84^\circ$ ) | $\omega_{\text{S}_{\text{CT-Naph}}}$<br>( $\phi = 80^\circ$ ) | $\omega_{\text{S}_{\text{CT-Naph}}}$<br>( $\phi = 76^\circ$ ) | $\omega_{\text{S}_{\text{CT-Naph}}}$<br>( $\phi = 72^\circ$ ) | $\omega_{\text{S}_{\text{CT-Naph}}}$<br>( $\phi = 68^\circ$ ) | $\omega_{\text{S}_{\text{CT-Naph}}}$<br>( $\phi = 64^\circ$ ) | $\omega_{\text{S}_{\text{CT-Naph}}}$<br>( $\phi = 60^\circ$ ) |
| 3183.05                                                       | 3183.06                                                       | 3183.02                                                       | 3183.19                                                       | 3183.24                                                       | 3183.22                                                       | 3183.09                                                       |
| 3183.16                                                       | 3183.48                                                       | 3183.61                                                       | 3183.64                                                       | 3183.61                                                       | 3183.35                                                       | 3183.24                                                       |
| 3184.82                                                       | 3184.77                                                       | 3184.80                                                       | 3185.03                                                       | 3185.27                                                       | 3185.47                                                       | 3185.46                                                       |
| 3189.11                                                       | 3189.10                                                       | 3189.06                                                       | 3189.18                                                       | 3189.23                                                       | 3189.22                                                       | 3189.21                                                       |
| 3189.24                                                       | 3189.46                                                       | 3189.56                                                       | 3189.60                                                       | 3189.62                                                       | 3189.42                                                       | 3189.22                                                       |
| 3196.41                                                       | 3196.46                                                       | 3196.44                                                       | 3196.46                                                       | 3196.47                                                       | 3196.44                                                       | 3196.34                                                       |
| 3196.47                                                       | 3196.51                                                       | 3196.50                                                       | 3196.52                                                       | 3196.54                                                       | 3196.49                                                       | 3196.45                                                       |
| 3203.71                                                       | 3203.63                                                       | 3203.60                                                       | 3203.39                                                       | 3203.32                                                       | 3203.09                                                       | 3202.59                                                       |
| 3204.27                                                       | 3203.98                                                       | 3203.83                                                       | 3203.91                                                       | 3203.87                                                       | 3203.67                                                       | 3203.15                                                       |
| 3209.12                                                       | 3209.15                                                       | 3209.34                                                       | 3209.34                                                       | 3209.36                                                       | 3209.15                                                       | 3208.57                                                       |
| 3209.72                                                       | 3209.58                                                       | 3209.69                                                       | 3209.76                                                       | 3209.73                                                       | 3209.73                                                       | 3209.83                                                       |
| 3230.26                                                       | 3230.34                                                       | 3230.45                                                       | 3230.09                                                       | 3229.28                                                       | 3228.19                                                       | 3226.19                                                       |
| 3230.79                                                       | 3230.99                                                       | 3231.47                                                       | 3231.56                                                       | 3232.17                                                       | 3232.76                                                       | 3232.21                                                       |



**S14** Frequencies of all geometries of molecule 2 computed at (B3LYP/6-311G(d,p)) level of theory

| molecule-2     |                                                    |                        |                        |                        |                        |
|----------------|----------------------------------------------------|------------------------|------------------------|------------------------|------------------------|
| $\omega_{S_0}$ | $\omega_{S_{CT-Naph}}$<br>( $\phi = 89.53^\circ$ ) | $\omega_{S_{CT-Biph}}$ | $\omega_{T_{CT-Biph}}$ | $\omega_{T_{CT-Naph}}$ | $\omega_{T_{LE-Naph}}$ |
| 10.52          | 12.76                                              | 12.76                  | 12.13                  | 13.27                  | 13.20                  |
| 16.48          | 16.17                                              | 16.17                  | 14.98                  | 18.09                  | 18.13                  |
| 17.12          | 18.43                                              | 18.43                  | 19.85                  | 18.71                  | 18.49                  |
| 18.41          | 22.24                                              | 22.25                  | 22.21                  | 19.40                  | 19.36                  |
| 23.43          | 22.95                                              | 22.94                  | 23.96                  | 27.01                  | 26.97                  |
| 28.16          | 27.99                                              | 27.99                  | 27.82                  | 28.38                  | 28.12                  |
| 41.01          | 36.87                                              | 36.86                  | 39.99                  | 41.90                  | 41.82                  |
| 42.62          | 48.43                                              | 48.43                  | 45.23                  | 49.03                  | 49.04                  |
| 45.47          | 50.55                                              | 50.54                  | 53.34                  | 49.65                  | 49.66                  |
| 51.55          | 56.92                                              | 56.91                  | 56.81                  | 51.89                  | 51.83                  |
| 73.52          | 72.91                                              | 72.91                  | 67.19                  | 73.46                  | 73.49                  |
| 78.59          | 78.92                                              | 78.92                  | 73.53                  | 78.76                  | 78.79                  |
| 78.95          | 84.49                                              | 84.49                  | 79.52                  | 82.47                  | 82.50                  |
| 85.77          | 85.94                                              | 85.94                  | 89.25                  | 89.08                  | 89.14                  |
| 104.73         | 109.46                                             | 109.46                 | 107.16                 | 109.14                 | 109.15                 |
| 121.25         | 118.26                                             | 118.25                 | 124.62                 | 119.09                 | 119.12                 |
| 130.96         | 127.39                                             | 127.39                 | 130.05                 | 127.11                 | 127.09                 |
| 133.23         | 132.01                                             | 132.01                 | 135.66                 | 131.38                 | 131.40                 |
| 145.04         | 142.92                                             | 142.92                 | 137.09                 | 145.79                 | 145.81                 |
| 162.61         | 162.09                                             | 162.08                 | 167.21                 | 161.53                 | 161.55                 |
| 178.52         | 177.87                                             | 177.89                 | 175.53                 | 174.29                 | 174.21                 |
| 187.72         | 190.19                                             | 190.19                 | 178.10                 | 191.55                 | 191.52                 |
| 202.61         | 197.14                                             | 197.14                 | 204.01                 | 195.57                 | 195.56                 |
| 215.24         | 213.79                                             | 213.80                 | 213.98                 | 215.46                 | 215.44                 |
| 229.44         | 234.52                                             | 234.52                 | 226.19                 | 231.56                 | 231.56                 |
| 260.13         | 257.58                                             | 257.59                 | 256.24                 | 247.78                 | 247.72                 |
| 274.83         | 274.21                                             | 274.19                 | 261.66                 | 261.19                 | 261.15                 |
| 289.28         | 279.18                                             | 279.16                 | 281.64                 | 278.73                 | 278.75                 |
| 299.57         | 297.29                                             | 297.30                 | 294.22                 | 297.35                 | 297.33                 |

| molecule-2     |                                                    |                        |                        |                        |                        |
|----------------|----------------------------------------------------|------------------------|------------------------|------------------------|------------------------|
| $\omega_{S_0}$ | $\omega_{S_{CT-Naph}}$<br>( $\phi = 89.53^\circ$ ) | $\omega_{S_{CT-Biph}}$ | $\omega_{T_{CT-Biph}}$ | $\omega_{T_{CT-Naph}}$ | $\omega_{T_{LE-Naph}}$ |
| 316.98         | 321.26                                             | 321.26                 | 306.94                 | 316.99                 | 317.01                 |
| 339.92         | 338.57                                             | 338.57                 | 321.56                 | 337.93                 | 337.92                 |
| 345.25         | 346.52                                             | 346.52                 | 346.67                 | 343.34                 | 343.36                 |
| 357.34         | 362.89                                             | 362.89                 | 356.50                 | 354.27                 | 354.25                 |
| 385.74         | 371.81                                             | 371.81                 | 376.94                 | 365.18                 | 365.20                 |
| 400.99         | 388.78                                             | 388.77                 | 393.17                 | 385.99                 | 386.01                 |
| 411.78         | 403.14                                             | 403.14                 | 405.73                 | 403.52                 | 403.54                 |
| 415.81         | 414.34                                             | 414.35                 | 415.92                 | 415.34                 | 415.41                 |
| 416.57         | 414.88                                             | 414.88                 | 416.72                 | 415.59                 | 415.64                 |
| 422.51         | 419.82                                             | 419.82                 | 421.00                 | 417.70                 | 417.71                 |
| 423.32         | 420.91                                             | 420.91                 | 421.47                 | 421.75                 | 421.80                 |
| 429.83         | 422.80                                             | 422.80                 | 424.39                 | 422.96                 | 423.11                 |
| 442.11         | 430.52                                             | 430.52                 | 424.79                 | 427.46                 | 427.46                 |
| 454.56         | 454.99                                             | 454.98                 | 441.28                 | 452.17                 | 452.10                 |
| 456.82         | 462.00                                             | 462.00                 | 447.51                 | 457.51                 | 457.42                 |
| 463.29         | 468.58                                             | 468.57                 | 454.96                 | 463.78                 | 463.73                 |
| 482.74         | 500.86                                             | 500.86                 | 472.06                 | 465.58                 | 465.56                 |
| 483.27         | 503.63                                             | 503.62                 | 480.53                 | 480.59                 | 480.51                 |
| 497.50         | 504.91                                             | 504.91                 | 495.93                 | 492.53                 | 492.52                 |
| 507.71         | 511.74                                             | 511.75                 | 501.80                 | 498.82                 | 498.80                 |
| 515.36         | 520.61                                             | 520.61                 | 512.23                 | 510.27                 | 510.18                 |
| 526.31         | 525.04                                             | 525.05                 | 526.24                 | 513.61                 | 513.58                 |
| 534.52         | 526.89                                             | 526.89                 | 528.32                 | 519.03                 | 518.98                 |
| 550.89         | 542.10                                             | 542.10                 | 534.25                 | 531.32                 | 531.28                 |
| 562.75         | 564.41                                             | 564.41                 | 554.38                 | 536.74                 | 536.72                 |
| 568.49         | 568.83                                             | 568.84                 | 559.66                 | 566.02                 | 566.01                 |
| 571.07         | 581.78                                             | 581.77                 | 568.75                 | 570.11                 | 570.10                 |
| 601.91         | 583.39                                             | 583.39                 | 573.50                 | 570.89                 | 570.88                 |
| 622.93         | 613.21                                             | 613.21                 | 596.66                 | 606.24                 | 606.25                 |
| 624.66         | 615.42                                             | 615.42                 | 613.96                 | 609.73                 | 609.72                 |
| 627.65         | 628.07                                             | 628.07                 | 620.40                 | 625.69                 | 625.70                 |
| 631.21         | 631.31                                             | 631.31                 | 625.48                 | 630.85                 | 630.84                 |
| 632.63         | 632.97                                             | 632.97                 | 628.22                 | 632.20                 | 632.21                 |
| 634.44         | 634.75                                             | 634.74                 | 631.63                 | 635.20                 | 635.20                 |
| 653.37         | 643.81                                             | 643.81                 | 639.03                 | 636.32                 | 636.30                 |
| 656.14         | 651.74                                             | 651.74                 | 643.05                 | 651.87                 | 651.86                 |
| 656.71         | 655.59                                             | 655.59                 | 649.26                 | 655.79                 | 655.79                 |

| molecule-2     |                                                    |                        |                        |                        |                        |
|----------------|----------------------------------------------------|------------------------|------------------------|------------------------|------------------------|
| $\omega_{S_0}$ | $\omega_{S_{CT-Naph}}$<br>( $\phi = 89.53^\circ$ ) | $\omega_{S_{CT-Biph}}$ | $\omega_{T_{CT-Biph}}$ | $\omega_{T_{CT-Naph}}$ | $\omega_{T_{LE-Naph}}$ |
| 672.04         | 657.45                                             | 657.45                 | 655.72                 | 657.05                 | 657.06                 |
| 689.36         | 679.71                                             | 679.71                 | 668.04                 | 673.45                 | 673.44                 |
| 699.00         | 685.06                                             | 685.04                 | 682.28                 | 681.26                 | 681.24                 |
| 701.68         | 694.43                                             | 694.43                 | 689.97                 | 697.07                 | 697.05                 |
| 713.66         | 712.91                                             | 712.91                 | 703.82                 | 705.94                 | 705.88                 |
| 713.96         | 713.27                                             | 713.27                 | 709.08                 | 713.57                 | 713.58                 |
| 719.49         | 717.99                                             | 717.99                 | 710.94                 | 713.77                 | 713.80                 |
| 730.60         | 720.50                                             | 720.50                 | 713.58                 | 714.44                 | 714.37                 |
| 748.78         | 729.85                                             | 729.85                 | 716.62                 | 724.13                 | 724.12                 |
| 749.21         | 739.45                                             | 739.45                 | 746.36                 | 731.34                 | 731.32                 |
| 751.66         | 749.72                                             | 749.72                 | 747.28                 | 740.24                 | 740.18                 |
| 765.70         | 750.28                                             | 750.28                 | 750.84                 | 748.66                 | 748.66                 |
| 776.10         | 753.04                                             | 753.00                 | 751.77                 | 749.42                 | 749.42                 |
| 783.05         | 757.65                                             | 757.63                 | 766.45                 | 759.22                 | 759.29                 |
| 783.43         | 764.32                                             | 764.33                 | 772.01                 | 763.00                 | 763.01                 |
| 793.64         | 775.81                                             | 775.81                 | 782.57                 | 776.55                 | 776.52                 |
| 796.73         | 783.67                                             | 783.67                 | 784.50                 | 782.85                 | 782.85                 |
| 806.83         | 784.39                                             | 784.39                 | 789.57                 | 783.62                 | 783.63                 |
| 819.27         | 791.48                                             | 791.48                 | 795.51                 | 791.32                 | 791.29                 |
| 824.15         | 798.64                                             | 798.64                 | 805.45                 | 797.95                 | 797.94                 |
| 825.55         | 813.22                                             | 813.21                 | 810.88                 | 820.22                 | 820.16                 |
| 852.12         | 837.34                                             | 837.34                 | 817.26                 | 826.96                 | 826.81                 |
| 852.36         | 838.34                                             | 838.35                 | 818.14                 | 828.38                 | 828.23                 |
| 859.40         | 839.33                                             | 839.34                 | 830.42                 | 852.24                 | 852.32                 |
| 859.59         | 851.25                                             | 851.26                 | 845.21                 | 852.45                 | 852.50                 |
| 859.82         | 852.05                                             | 852.06                 | 849.95                 | 855.80                 | 855.83                 |
| 860.24         | 859.07                                             | 859.08                 | 858.25                 | 858.70                 | 858.74                 |
| 872.38         | 859.82                                             | 859.82                 | 859.65                 | 859.52                 | 859.63                 |
| 881.64         | 861.06                                             | 861.06                 | 861.40                 | 859.81                 | 859.90                 |
| 884.48         | 864.76                                             | 864.76                 | 877.34                 | 860.96                 | 860.92                 |
| 887.78         | 867.79                                             | 867.80                 | 890.84                 | 865.65                 | 865.58                 |
| 918.40         | 894.12                                             | 894.12                 | 904.70                 | 884.89                 | 884.85                 |
| 934.53         | 896.17                                             | 896.17                 | 912.07                 | 889.28                 | 889.22                 |
| 937.48         | 903.60                                             | 903.61                 | 927.48                 | 905.04                 | 905.03                 |
| 937.76         | 914.05                                             | 914.05                 | 934.56                 | 914.11                 | 914.11                 |
| 943.99         | 917.03                                             | 917.04                 | 938.03                 | 931.14                 | 931.29                 |

| molecule-2     |                                                    |                        |                        |                        |                        |
|----------------|----------------------------------------------------|------------------------|------------------------|------------------------|------------------------|
| $\omega_{S_0}$ | $\omega_{S_{CT-Naph}}$<br>( $\phi = 89.53^\circ$ ) | $\omega_{S_{CT-Biph}}$ | $\omega_{T_{CT-Biph}}$ | $\omega_{T_{CT-Naph}}$ | $\omega_{T_{LE-Naph}}$ |
| 950.17         | 927.90                                             | 927.90                 | 941.88                 | 937.23                 | 937.05                 |
| 950.50         | 940.28                                             | 940.28                 | 951.97                 | 938.04                 | 938.19                 |
| 960.26         | 940.64                                             | 940.64                 | 958.57                 | 938.17                 | 938.34                 |
| 980.38         | 958.13                                             | 958.13                 | 963.72                 | 949.91                 | 950.11                 |
| 981.20         | 984.62                                             | 984.62                 | 964.33                 | 953.93                 | 953.92                 |
| 981.37         | 984.90                                             | 984.90                 | 973.75                 | 959.41                 | 959.45                 |
| 988.70         | 988.30                                             | 988.30                 | 980.34                 | 960.38                 | 960.40                 |
| 989.46         | 989.19                                             | 989.19                 | 982.01                 | 982.16                 | 982.35                 |
| 990.76         | 991.48                                             | 991.48                 | 982.43                 | 982.55                 | 982.66                 |
| 990.96         | 991.54                                             | 991.54                 | 989.74                 | 989.29                 | 989.57                 |
| 1000.86        | 993.85                                             | 993.85                 | 991.23                 | 989.86                 | 990.11                 |
| 1009.79        | 994.01                                             | 994.01                 | 991.97                 | 990.96                 | 991.21                 |
| 1009.89        | 1011.77                                            | 1011.77                | 997.06                 | 991.42                 | 991.65                 |
| 1010.70        | 1012.01                                            | 1012.01                | 1001.16                | 1004.98                | 1004.79                |
| 1011.21        | 1012.02                                            | 1012.02                | 1002.30                | 1010.07                | 1010.30                |
| 1011.45        | 1012.13                                            | 1012.13                | 1010.00                | 1010.14                | 1010.37                |
| 1020.08        | 1020.13                                            | 1020.13                | 1011.03                | 1011.44                | 1011.37                |
| 1020.22        | 1020.25                                            | 1020.25                | 1012.01                | 1011.76                | 1011.68                |
| 1034.41        | 1021.05                                            | 1021.05                | 1018.48                | 1020.22                | 1020.21                |
| 1037.03        | 1032.89                                            | 1032.90                | 1020.20                | 1020.30                | 1020.29                |
| 1037.12        | 1035.02                                            | 1035.02                | 1033.76                | 1034.33                | 1034.29                |
| 1054.59        | 1050.51                                            | 1050.51                | 1037.02                | 1037.13                | 1037.10                |
| 1057.65        | 1053.66                                            | 1053.66                | 1049.54                | 1053.26                | 1053.22                |
| 1061.38        | 1055.69                                            | 1055.69                | 1052.40                | 1057.68                | 1057.62                |
| 1069.65        | 1065.46                                            | 1065.46                | 1060.10                | 1060.06                | 1060.00                |
| 1070.19        | 1066.25                                            | 1066.25                | 1065.54                | 1066.57                | 1066.46                |
| 1096.65        | 1076.07                                            | 1076.05                | 1093.98                | 1070.02                | 1069.97                |
| 1102.20        | 1099.82                                            | 1099.83                | 1102.68                | 1070.87                | 1070.84                |
| 1102.39        | 1103.44                                            | 1103.44                | 1102.74                | 1102.54                | 1102.56                |
| 1136.36        | 1103.78                                            | 1103.78                | 1131.38                | 1102.84                | 1102.84                |
| 1141.55        | 1146.19                                            | 1146.18                | 1144.23                | 1139.03                | 1138.97                |
| 1142.17        | 1146.93                                            | 1146.92                | 1146.88                | 1140.19                | 1140.14                |
| 1159.06        | 1150.70                                            | 1150.70                | 1162.88                | 1142.64                | 1142.69                |

| molecule-2     |                                                    |                        |                        |                        |                        |
|----------------|----------------------------------------------------|------------------------|------------------------|------------------------|------------------------|
| $\omega_{S_0}$ | $\omega_{S_{CT-Naph}}$<br>( $\phi = 89.53^\circ$ ) | $\omega_{S_{CT-Biph}}$ | $\omega_{T_{CT-Biph}}$ | $\omega_{T_{CT-Naph}}$ | $\omega_{T_{LE-Naph}}$ |
| 1167.54        | 1154.34                                            | 1154.36                | 1165.30                | 1143.24                | 1143.33                |
| 1176.87        | 1161.99                                            | 1161.99                | 1169.43                | 1151.34                | 1151.28                |
| 1177.03        | 1173.18                                            | 1173.18                | 1173.68                | 1165.86                | 1165.78                |
| 1177.07        | 1178.00                                            | 1178.00                | 1177.29                | 1177.42                | 1177.37                |
| 1188.57        | 1178.09                                            | 1178.09                | 1180.61                | 1177.42                | 1177.38                |
| 1191.48        | 1195.91                                            | 1195.92                | 1188.72                | 1193.80                | 1193.74                |
| 1200.35        | 1201.28                                            | 1201.28                | 1200.67                | 1198.29                | 1198.21                |
| 1200.59        | 1201.77                                            | 1201.77                | 1200.90                | 1200.79                | 1200.75                |
| 1208.49        | 1202.61                                            | 1202.67                | 1205.82                | 1201.22                | 1201.18                |
| 1214.47        | 1207.22                                            | 1207.24                | 1214.84                | 1204.42                | 1204.39                |
| 1218.79        | 1215.54                                            | 1215.54                | 1218.95                | 1211.55                | 1211.59                |
| 1231.44        | 1218.92                                            | 1218.91                | 1233.52                | 1215.13                | 1215.21                |
| 1241.57        | 1224.59                                            | 1224.57                | 1242.02                | 1223.28                | 1223.28                |
| 1258.77        | 1256.92                                            | 1256.92                | 1249.01                | 1256.57                | 1256.56                |
| 1278.13        | 1270.17                                            | 1270.18                | 1271.51                | 1262.88                | 1262.89                |
| 1280.89        | 1286.42                                            | 1286.43                | 1279.29                | 1271.81                | 1271.83                |
| 1283.66        | 1287.27                                            | 1287.28                | 1281.44                | 1282.75                | 1282.70                |
| 1291.62        | 1290.36                                            | 1290.36                | 1284.37                | 1285.68                | 1285.61                |
| 1298.74        | 1295.99                                            | 1296.00                | 1290.86                | 1294.14                | 1294.06                |
| 1302.59        | 1303.66                                            | 1303.65                | 1301.86                | 1302.15                | 1302.08                |
| 1302.79        | 1304.20                                            | 1304.20                | 1303.92                | 1302.86                | 1302.79                |
| 1308.39        | 1306.70                                            | 1306.70                | 1309.49                | 1303.48                | 1303.43                |
| 1314.83        | 1309.04                                            | 1309.04                | 1319.79                | 1307.47                | 1307.43                |
| 1317.60        | 1318.75                                            | 1318.76                | 1324.21                | 1313.15                | 1313.11                |
| 1324.71        | 1324.97                                            | 1324.97                | 1325.90                | 1317.98                | 1317.90                |
| 1329.37        | 1327.84                                            | 1327.84                | 1336.11                | 1321.16                | 1321.12                |
| 1336.79        | 1341.35                                            | 1341.35                | 1345.12                | 1326.70                | 1326.62                |
| 1340.07        | 1342.13                                            | 1342.13                | 1356.05                | 1329.36                | 1329.32                |
| 1351.31        | 1357.72                                            | 1357.71                | 1357.29                | 1336.95                | 1336.98                |
| 1356.87        | 1357.85                                            | 1357.84                | 1361.29                | 1340.83                | 1340.85                |
| 1357.24        | 1358.38                                            | 1358.38                | 1369.55                | 1347.79                | 1347.80                |
| 1358.30        | 1358.86                                            | 1358.88                | 1373.56                | 1351.59                | 1351.58                |
| 1367.57        | 1363.05                                            | 1363.05                | 1383.44                | 1357.22                | 1357.25                |
| 1390.82        | 1366.14                                            | 1366.13                | 1391.37                | 1357.65                | 1357.66                |
| 1419.59        | 1391.07                                            | 1391.03                | 1403.63                | 1411.50                | 1411.39                |

| molecule-2     |                                                    |                        |                        |                        |                        |
|----------------|----------------------------------------------------|------------------------|------------------------|------------------------|------------------------|
| $\omega_{S_0}$ | $\omega_{S_{CT-Naph}}$<br>( $\phi = 89.53^\circ$ ) | $\omega_{S_{CT-Biph}}$ | $\omega_{T_{CT-Biph}}$ | $\omega_{T_{CT-Naph}}$ | $\omega_{T_{LE-Naph}}$ |
| 1423.19        | 1424.91                                            | 1424.91                | 1420.25                | 1422.92                | 1422.88                |
| 1430.10        | 1428.81                                            | 1428.82                | 1431.43                | 1429.52                | 1429.51                |
| 1444.99        | 1433.35                                            | 1433.35                | 1457.55                | 1429.88                | 1429.84                |
| 1464.79        | 1447.02                                            | 1447.02                | 1463.31                | 1436.99                | 1436.93                |
| 1468.22        | 1452.65                                            | 1452.67                | 1469.77                | 1445.72                | 1445.69                |
| 1477.21        | 1468.46                                            | 1468.46                | 1470.38                | 1464.17                | 1464.14                |
| 1479.69        | 1471.81                                            | 1471.82                | 1478.64                | 1465.86                | 1465.80                |
| 1494.96        | 1477.41                                            | 1477.40                | 1484.32                | 1472.64                | 1472.44                |
| 1512.42        | 1479.26                                            | 1479.25                | 1491.48                | 1477.44                | 1477.40                |
| 1518.26        | 1486.13                                            | 1486.14                | 1494.34                | 1480.54                | 1480.51                |
| 1525.13        | 1515.56                                            | 1515.56                | 1503.25                | 1506.57                | 1506.57                |
| 1537.62        | 1521.02                                            | 1521.02                | 1510.02                | 1516.31                | 1516.30                |
| 1542.25        | 1525.98                                            | 1525.97                | 1521.37                | 1522.36                | 1522.32                |
| 1552.35        | 1532.68                                            | 1532.67                | 1524.53                | 1523.83                | 1523.80                |
| 1558.16        | 1539.00                                            | 1538.99                | 1540.26                | 1532.54                | 1532.49                |
| 1573.83        | 1549.75                                            | 1549.74                | 1543.28                | 1551.12                | 1551.12                |
| 1584.75        | 1550.83                                            | 1550.82                | 1550.11                | 1552.31                | 1552.31                |
| 1595.30        | 1552.13                                            | 1552.12                | 1552.94                | 1563.74                | 1563.72                |
| 1610.57        | 1582.49                                            | 1582.48                | 1583.31                | 1569.60                | 1569.57                |
| 1616.10        | 1588.81                                            | 1588.81                | 1586.97                | 1584.78                | 1584.72                |
| 1616.72        | 1599.10                                            | 1599.12                | 1592.87                | 1593.58                | 1593.53                |
| 1627.36        | 1603.24                                            | 1603.22                | 1603.35                | 1615.83                | 1615.75                |
| 1627.82        | 1613.80                                            | 1613.81                | 1610.46                | 1617.00                | 1616.91                |
| 1635.78        | 1617.11                                            | 1617.11                | 1615.91                | 1621.52                | 1621.47                |
| 1637.63        | 1617.38                                            | 1617.38                | 1628.29                | 1622.08                | 1622.04                |
| 1638.56        | 1636.32                                            | 1636.32                | 1636.23                | 1637.53                | 1637.42                |
| 1644.90        | 1638.09                                            | 1638.09                | 1637.22                | 1638.39                | 1638.28                |
| 1647.49        | 1641.57                                            | 1641.57                | 1643.32                | 1643.99                | 1643.91                |
| 1661.65        | 1645.56                                            | 1645.56                | 1654.99                | 1646.94                | 1646.87                |
| 1668.58        | 1659.61                                            | 1659.62                | 1662.93                | 1660.71                | 1660.68                |
| 3162.94        | 3140.85                                            | 3140.86                | 3158.35                | 3163.31                | 3163.44                |
| 3163.03        | 3149.08                                            | 3149.11                | 3163.24                | 3163.36                | 3163.48                |
| 3166.77        | 3151.96                                            | 3151.98                | 3163.40                | 3163.38                | 3163.53                |
| 3167.75        | 3163.74                                            | 3163.77                | 3168.50                | 3168.46                | 3168.57                |

| molecule-2     |                                                    |                        |                        |                        |                        |
|----------------|----------------------------------------------------|------------------------|------------------------|------------------------|------------------------|
| $\omega_{S_0}$ | $\omega_{S_{CT-Naph}}$<br>( $\phi = 89.53^\circ$ ) | $\omega_{S_{CT-Biph}}$ | $\omega_{T_{CT-Biph}}$ | $\omega_{T_{CT-Naph}}$ | $\omega_{T_{LE-Naph}}$ |
| 3167.80        | 3164.83                                            | 3164.85                | 3168.58                | 3168.51                | 3168.60                |
| 3169.70        | 3165.06                                            | 3165.06                | 3169.35                | 3170.19                | 3170.33                |
| 3169.92        | 3165.07                                            | 3165.07                | 3169.66                | 3171.34                | 3171.47                |
| 3170.32        | 3170.49                                            | 3170.49                | 3171.86                | 3171.51                | 3171.58                |
| 3171.24        | 3170.55                                            | 3170.55                | 3173.23                | 3172.07                | 3172.19                |
| 3171.44        | 3176.17                                            | 3176.17                | 3174.11                | 3172.66                | 3172.80                |
| 3175.63        | 3176.78                                            | 3176.77                | 3178.15                | 3172.93                | 3173.02                |
| 3177.92        | 3177.37                                            | 3177.39                | 3178.68                | 3178.38                | 3178.45                |
| 3177.99        | 3177.75                                            | 3177.75                | 3180.95                | 3178.44                | 3178.52                |
| 3182.22        | 3178.50                                            | 3178.49                | 3183.35                | 3181.44                | 3181.55                |
| 3182.27        | 3180.31                                            | 3180.31                | 3185.19                | 3183.11                | 3183.16                |
| 3183.45        | 3180.35                                            | 3180.35                | 3187.03                | 3183.11                | 3183.19                |
| 3184.40        | 3184.51                                            | 3184.51                | 3188.50                | 3185.04                | 3185.10                |
| 3185.81        | 3185.11                                            | 3185.11                | 3189.96                | 3186.46                | 3186.54                |
| 3185.86        | 3191.26                                            | 3191.26                | 3190.05                | 3188.02                | 3188.09                |
| 3188.28        | 3192.04                                            | 3192.04                | 3191.86                | 3188.03                | 3188.11                |
| 3188.42        | 3192.29                                            | 3192.29                | 3192.28                | 3191.26                | 3191.33                |
| 3188.51        | 3192.61                                            | 3192.60                | 3194.47                | 3191.85                | 3191.90                |
| 3191.79        | 3194.38                                            | 3194.38                | 3195.48                | 3192.33                | 3192.41                |
| 3191.81        | 3194.92                                            | 3194.92                | 3199.14                | 3192.75                | 3192.80                |
| 3192.63        | 3204.38                                            | 3204.36                | 3199.73                | 3194.38                | 3194.40                |
| 3192.92        | 3205.07                                            | 3205.05                | 3200.64                | 3196.59                | 3196.58                |
| 3195.77        | 3209.83                                            | 3209.83                | 3201.63                | 3197.21                | 3197.18                |
| 3199.54        | 3210.25                                            | 3210.25                | 3214.34                | 3197.82                | 3197.85                |
| 3206.36        | 3229.85                                            | 3229.84                | 3214.77                | 3213.27                | 3213.26                |
| 3206.80        | 3230.54                                            | 3230.54                | 3223.45                | 3221.85                | 3221.76                |

# S15 Coordinates of the optimized geometries of molecule 1

S<sub>0</sub> geometry (Å) (B3LYP/6-311G(d,p))

|   |             |             |             |
|---|-------------|-------------|-------------|
| C | -6.64994200 | -0.67600800 | 0.82481800  |
| C | -5.25268700 | -0.52449500 | 0.86281200  |
| C | -4.65766200 | 0.69524500  | 0.59948800  |
| C | -5.42206300 | 1.82958600  | 0.27693000  |
| C | -6.81072900 | 1.68179200  | 0.23958300  |
| C | -7.41141100 | 0.45351300  | 0.50904800  |
| C | -3.36841100 | 3.08908500  | 0.02090800  |
| C | -2.64503000 | 1.92948600  | 0.34817200  |
| C | -1.26270500 | 1.92218000  | 0.36383700  |
| H | -0.76796200 | 0.98805100  | 0.59990300  |
| C | -0.52518900 | 3.07981400  | 0.05952900  |
| C | -1.24434000 | 4.23546900  | -0.26072200 |
| C | -2.63778800 | 4.24096600  | -0.28087500 |
| H | -4.60321200 | -1.36350000 | 1.08046100  |
| H | -7.42850300 | 2.53820600  | 0.00494100  |
| H | -3.16450700 | 5.15331300  | -0.52656300 |
| H | -8.49258700 | 0.39129800  | 0.49292000  |
| H | -0.71975600 | 5.15804400  | -0.47704800 |
| N | -4.77295800 | 3.04800600  | 0.01512700  |
| O | -3.27746200 | 0.74144300  | 0.66409500  |
| C | 0.95823000  | 3.06762600  | 0.08438600  |
| C | 1.70235900  | 3.83059800  | -0.83067900 |
| C | 1.66165000  | 2.29473300  | 1.02285600  |
| C | 3.09447500  | 3.82395000  | -0.80546600 |
| H | 1.18716200  | 4.41704400  | -1.58268100 |
| C | 3.05391200  | 2.28538500  | 1.04568900  |
| H | 1.11496600  | 1.71257400  | 1.75583400  |
| C | 3.77805900  | 3.05072300  | 0.13236300  |
| H | 3.64599600  | 4.41668300  | -1.52679400 |
| H | 3.57339000  | 1.68536500  | 1.78455300  |
| C | -7.28364900 | -1.98605900 | 1.11387700  |
| C | -8.44631900 | -2.39075500 | 0.43736100  |
| C | -6.74147000 | -2.85898300 | 2.07145000  |
| C | -9.04502000 | -3.61776300 | 0.71046600  |
| H | -8.87308000 | -1.74906400 | -0.32481300 |
| C | -7.33832900 | -4.08763800 | 2.34202500  |
| H | -5.85725100 | -2.56507700 | 2.62528700  |
| C | -8.49396000 | -4.47346500 | 1.66377900  |
| H | -9.93845400 | -3.90978100 | 0.16981100  |
| H | -6.90391200 | -4.74079000 | 3.09067500  |
| C | -5.53109500 | 4.20667000  | -0.36645900 |
| C | -5.96780100 | 5.12389400  | 0.63593400  |
| C | -5.82678600 | 4.41816300  | -1.69332600 |
| C | -5.68728000 | 4.94809200  | 2.01652500  |
| C | -6.72177800 | 6.27015500  | 0.22308500  |
| C | -6.57108300 | 5.55082900  | -2.09228100 |
| H | -5.48232600 | 3.70527900  | -2.43320900 |
| C | -6.13080500 | 5.86171700  | 2.94298000  |
| H | -5.11790100 | 4.08296700  | 2.33212300  |
| C | -7.16303200 | 7.19252900  | 1.20901500  |
| C | -7.00776600 | 6.45491700  | -1.15500800 |



|   |             |             |             |
|---|-------------|-------------|-------------|
| H | -6.79331500 | 5.69874300  | -3.14234800 |
| C | -6.87530700 | 6.99453000  | 2.53763500  |
| H | -5.90967500 | 5.71553700  | 3.99403400  |
| H | -7.73326300 | 8.05916600  | 0.89246100  |
| H | -7.57949900 | 7.32570000  | -1.45687800 |
| H | -7.21738900 | 7.70531500  | 3.28094000  |
| H | -8.95898600 | -5.42959900 | 1.87484300  |
| H | 4.86185400  | 3.04409800  | 0.15059200  |

S<sub>CT-Naph</sub> geometry (Å) (B3LYP/6-311G(d,p))

|   |             |             |             |
|---|-------------|-------------|-------------|
| C | -6.62510600 | -0.66646100 | 0.81849300  |
| C | -5.23412100 | -0.54368400 | 0.84018500  |
| C | -4.63543900 | 0.67225300  | 0.55244600  |
| C | -5.39783700 | 1.81753000  | 0.22488300  |
| C | -6.79907700 | 1.68965700  | 0.20537100  |
| C | -7.39081300 | 0.47971300  | 0.49490000  |
| C | -3.37598100 | 3.05771100  | -0.02411900 |
| C | -2.64168800 | 1.89469700  | 0.30513500  |
| C | -1.25665400 | 1.89426200  | 0.34383400  |
| H | -0.75551300 | 0.96392700  | 0.57537200  |
| C | -0.54383000 | 3.06135500  | 0.06082100  |
| C | -1.27681600 | 4.22863800  | -0.26287000 |
| C | -2.65377700 | 4.23219000  | -0.30575700 |
| H | -4.59207100 | -1.38689900 | 1.05712100  |
| H | -7.39425400 | 2.55902400  | -0.03241900 |
| H | -3.20192100 | 5.13095900  | -0.54723000 |
| H | -8.47089800 | 0.41622000  | 0.49608900  |
| H | -0.74802000 | 5.15161100  | -0.46078600 |
| N | -4.75816500 | 3.00981700  | -0.06400700 |
| O | -3.27424600 | 0.72097400  | 0.58514200  |
| C | 0.93541000  | 3.07860200  | 0.10123300  |
| C | 1.66775700  | 3.88360000  | -0.78672600 |
| C | 1.64047300  | 2.29053400  | 1.02569900  |
| C | 3.05872100  | 3.89515900  | -0.75384300 |
| H | 1.14929500  | 4.48357000  | -1.52500100 |
| C | 3.03102500  | 2.30839800  | 1.06096100  |
| H | 1.09868700  | 1.68082200  | 1.73898900  |
| C | 3.74576900  | 3.10927500  | 0.17057300  |
| H | 3.60618500  | 4.51453500  | -1.45476400 |
| H | 3.55663900  | 1.70153700  | 1.78903400  |
| C | -7.28028000 | -1.95668000 | 1.12876300  |
| C | -8.46956700 | -2.33117800 | 0.48211900  |
| C | -6.72824800 | -2.83616500 | 2.07461800  |
| C | -9.08240400 | -3.54701100 | 0.76871000  |
| H | -8.90411800 | -1.68185800 | -0.26839900 |
| C | -7.34603600 | -4.04847300 | 2.36419400  |
| H | -5.82569000 | -2.55931900 | 2.60634300  |
| C | -8.52446400 | -4.40957300 | 1.71150700  |
| H | -9.99359200 | -3.82294200 | 0.25081200  |
| H | -6.91045300 | -4.70865200 | 3.10519000  |
| C | -5.52455800 | 4.18886800  | -0.41699200 |
| C | -5.93950200 | 5.06982600  | 0.62345800  |
| C | -5.82081400 | 4.40545000  | -1.78444500 |
| C | -5.65780000 | 4.87673400  | 1.99558700  |

|   |             |             |             |
|---|-------------|-------------|-------------|
| C | -6.70158500 | 6.23680800  | 0.22242700  |
| C | -6.55026300 | 5.52843600  | -2.13797800 |
| H | -5.47632200 | 3.69710300  | -2.52829900 |
| C | -6.10304700 | 5.79378300  | 2.96654000  |
| H | -5.08965700 | 4.00919600  | 2.30998500  |
| C | -7.12854300 | 7.13182900  | 1.23181800  |
| C | -6.98786900 | 6.43528000  | -1.15887300 |
| H | -6.78479500 | 5.70745300  | -3.18203800 |
| C | -6.83269000 | 6.91221400  | 2.58585900  |
| H | -5.87177100 | 5.61942000  | 4.01194100  |
| H | -7.69908700 | 8.00713500  | 0.93695500  |
| H | -7.55823100 | 7.31160000  | -1.44781800 |
| H | -7.17651400 | 7.62012600  | 3.33305600  |
| H | -9.00433800 | -5.35490000 | 1.93652100  |
| H | 4.82912300  | 3.12146700  | 0.19767900  |

S<sub>CT-Phen</sub> geometry (Å) (B3LYP/6-311G(d,p))

|   |             |             |             |
|---|-------------|-------------|-------------|
| C | -6.63874400 | -0.68131300 | 0.83753600  |
| C | -5.24173300 | -0.51853000 | 0.87173800  |
| C | -4.64890500 | 0.68642800  | 0.55494700  |
| C | -5.42145300 | 1.83111200  | 0.17843400  |
| C | -6.82776100 | 1.67536500  | 0.14829400  |
| C | -7.41038400 | 0.47249200  | 0.45980200  |
| C | -3.38631400 | 3.08004300  | -0.07149400 |
| C | -2.64791300 | 1.91359200  | 0.30660700  |
| C | -1.26994400 | 1.91631800  | 0.37619200  |
| H | -0.79194000 | 0.98263400  | 0.64174400  |
| C | -0.52132700 | 3.06926000  | 0.07638800  |
| C | -1.26875500 | 4.23980100  | -0.29902300 |
| C | -2.63944100 | 4.24543400  | -0.36627500 |
| H | -4.58089000 | -1.33951600 | 1.11689000  |
| H | -7.44745200 | 2.52134900  | -0.11655500 |
| H | -3.16128100 | 5.15232900  | -0.64033400 |
| H | -8.48998700 | 0.41321900  | 0.44699400  |
| H | -0.74710100 | 5.16341200  | -0.50876700 |
| N | -4.76605600 | 3.01262200  | -0.11164500 |
| O | -3.28691700 | 0.74453600  | 0.59869400  |
| C | 0.93748200  | 3.07676800  | 0.13851500  |
| C | 1.70145500  | 4.08265200  | -0.50745200 |
| C | 1.66163800  | 2.08253200  | 0.84522600  |
| C | 3.08903100  | 4.08616100  | -0.45298100 |
| H | 1.20474600  | 4.85263900  | -1.08433600 |
| C | 3.04748100  | 2.09292700  | 0.89604300  |
| H | 1.13024100  | 1.30814000  | 1.38490500  |
| C | 3.78011200  | 3.09427500  | 0.24791500  |
| H | 3.63803500  | 4.86709100  | -0.96850000 |
| H | 3.56422200  | 1.31965200  | 1.45452200  |
| C | -7.27268500 | -1.95539400 | 1.16449800  |
| C | -8.60553500 | -2.24182800 | 0.77221600  |
| C | -6.59052400 | -2.96627200 | 1.88892800  |
| C | -9.20636300 | -3.45555700 | 1.07908400  |
| H | -9.16649300 | -1.51840300 | 0.19389300  |
| C | -7.19735500 | -4.17573500 | 2.19277000  |
| H | -5.58209200 | -2.78989100 | 2.24296700  |

|   |              |             |             |
|---|--------------|-------------|-------------|
| C | -8.51291700  | -4.43706800 | 1.79216800  |
| H | -10.22428500 | -3.64101600 | 0.75283300  |
| H | -6.64529300  | -4.92012200 | 2.75667000  |
| C | -5.53104300  | 4.18867400  | -0.46500100 |
| C | -5.95441200  | 5.08240500  | 0.55892900  |
| C | -5.82567400  | 4.40597600  | -1.78941900 |
| C | -5.66878300  | 4.89026400  | 1.93646400  |
| C | -6.70887400  | 6.23384700  | 0.16016000  |
| C | -6.57066600  | 5.54521000  | -2.16782400 |
| H | -5.48382900  | 3.70073000  | -2.53694300 |
| C | -6.10888800  | 5.79494400  | 2.87284500  |
| H | -5.09974300  | 4.02345600  | 2.24828600  |
| C | -7.14539500  | 7.14503700  | 1.15737500  |
| C | -7.00050400  | 6.43563000  | -1.21524000 |
| H | -6.79759100  | 5.70701300  | -3.21445400 |
| C | -6.85356300  | 6.93284300  | 2.48307700  |
| H | -5.88397400  | 5.63642100  | 3.92113700  |
| H | -7.71576900  | 8.01516900  | 0.85139100  |
| H | -7.57249800  | 7.31098000  | -1.50228000 |
| H | -7.19221800  | 7.63556400  | 3.23523800  |
| H | -8.98545800  | -5.38207900 | 2.03301700  |
| H | 4.86289700   | 3.10127900  | 0.29119300  |

T<sub>CT-Phen</sub> geometry (Å) (B3LYP/6-311G(d,p))

|   |             |             |             |
|---|-------------|-------------|-------------|
| C | -6.64151100 | -0.71606800 | 0.82817900  |
| C | -5.22217800 | -0.53801800 | 0.85321200  |
| C | -4.64151000 | 0.66151300  | 0.56171200  |
| C | -5.42036200 | 1.83046900  | 0.20776700  |
| C | -6.83242600 | 1.67429900  | 0.17958000  |
| C | -7.41938400 | 0.47829200  | 0.47068300  |
| C | -3.37807200 | 3.07941200  | -0.02825100 |
| C | -2.64932800 | 1.91909900  | 0.33334800  |
| C | -1.26428100 | 1.92697800  | 0.39833800  |
| H | -0.77087700 | 0.99787700  | 0.65430200  |
| C | -0.53461600 | 3.08494400  | 0.11059700  |
| C | -1.26487000 | 4.24627400  | -0.24945600 |
| C | -2.64214300 | 4.24642500  | -0.31663600 |
| H | -4.55470000 | -1.34991200 | 1.10676400  |
| H | -7.44917700 | 2.52464900  | -0.08057200 |
| H | -3.16829300 | 5.15208000  | -0.58560000 |
| H | -8.49732500 | 0.42335200  | 0.43156400  |
| H | -0.73756200 | 5.16924200  | -0.45374400 |
| N | -4.76093100 | 3.01326900  | -0.08163800 |
| O | -3.27855300 | 0.73895500  | 0.61502500  |
| C | 0.94218100  | 3.09584300  | 0.17816200  |
| C | 1.69985000  | 3.92642100  | -0.66747800 |
| C | 1.63608900  | 2.27743500  | 1.08798300  |
| C | 3.09011000  | 3.93574000  | -0.60677700 |
| H | 1.19889100  | 4.55183100  | -1.39689300 |
| C | 3.02605900  | 2.28698300  | 1.14663300  |
| H | 1.08271700  | 1.64628600  | 1.77346400  |
| C | 3.76214300  | 3.11628200  | 0.29993600  |
| H | 3.65019300  | 4.57927800  | -1.27600400 |
| H | 3.53549600  | 1.65194500  | 1.86278900  |

|   |              |             |             |
|---|--------------|-------------|-------------|
| C | -7.26483300  | -1.96959700 | 1.13116300  |
| C | -8.68756200  | -2.13493800 | 1.11164100  |
| C | -6.50892000  | -3.13768400 | 1.47324300  |
| C | -9.28522400  | -3.34890300 | 1.40576500  |
| H | -9.32770100  | -1.29918500 | 0.86354000  |
| C | -7.11919400  | -4.34261600 | 1.76430300  |
| H | -5.42812200  | -3.09147600 | 1.50815500  |
| C | -8.51738700  | -4.47272200 | 1.73657500  |
| H | -10.36748700 | -3.42481200 | 1.37811800  |
| H | -6.50355700  | -5.19965000 | 2.01762500  |
| C | -5.52239900  | 4.18260100  | -0.46215400 |
| C | -5.95169100  | 5.09429400  | 0.54437900  |
| C | -5.81362600  | 4.38149700  | -1.78964200 |
| C | -5.67406200  | 4.91941000  | 1.92562500  |
| C | -6.70062300  | 6.24169900  | 0.12550900  |
| C | -6.55387200  | 5.51604200  | -2.18964500 |
| H | -5.47075500  | 3.66426200  | -2.52545300 |
| C | -6.11600400  | 5.83810700  | 2.84751500  |
| H | -5.11111100  | 4.05352200  | 2.25052600  |
| C | -7.13917000  | 7.16877000  | 1.10816000  |
| C | -6.98539200  | 6.42326100  | -1.25306000 |
| H | -6.77564100  | 5.66197600  | -3.23971900 |
| C | -6.85431800  | 6.97321200  | 2.43740000  |
| H | -5.89820600  | 5.69333400  | 3.89927400  |
| H | -7.70516100  | 8.03656800  | 0.78782500  |
| H | -7.55335900  | 7.29569900  | -1.55660700 |
| H | -7.19431900  | 7.68739600  | 3.17819200  |
| H | -8.99025900  | -5.42019700 | 1.96565600  |
| H | 4.84494600   | 3.12445500  | 0.34710100  |

T<sub>LE-Naph</sub> geometry (Å) (B3LYP/6-311G(d,p))

|   |             |             |             |
|---|-------------|-------------|-------------|
| C | -6.66837500 | -0.81951600 | 0.78021900  |
| C | -5.27517000 | -0.64908900 | 0.76039400  |
| C | -4.71212600 | 0.60001400  | 0.56764600  |
| C | -5.50874100 | 1.74222800  | 0.37184000  |
| C | -6.89896500 | 1.57864400  | 0.43527400  |
| C | -7.46467500 | 0.32353300  | 0.62293300  |
| C | -3.49372300 | 3.06613800  | 0.18439500  |
| C | -2.74440500 | 1.90125600  | 0.41424800  |
| C | -1.35875800 | 1.92078800  | 0.42796800  |
| H | -0.84554700 | 0.98067600  | 0.58697500  |
| C | -0.65065400 | 3.10895000  | 0.20330600  |
| C | -1.39754300 | 4.26739300  | -0.05434100 |
| C | -2.78682900 | 4.24578700  | -0.06987500 |
| H | -4.60357600 | -1.49009500 | 0.87918400  |
| H | -7.53714200 | 2.44745400  | 0.35293400  |
| H | -3.33121900 | 5.15602700  | -0.27503700 |
| H | -8.54274500 | 0.24390900  | 0.68447500  |
| H | -0.89247700 | 5.20924000  | -0.22866000 |
| N | -4.90537500 | 2.99493500  | 0.16675400  |
| O | -3.33904600 | 0.67165700  | 0.59437500  |
| C | 0.83233600  | 3.13076900  | 0.22873100  |
| C | 1.55712900  | 3.96498500  | -0.63795600 |

|   |             |             |             |
|---|-------------|-------------|-------------|
| C | 1.55184500  | 2.31856000  | 1.12021600  |
| C | 2.94894400  | 3.98717700  | -0.61242000 |
| H | 1.02886400  | 4.58449700  | -1.35335000 |
| C | 2.94378600  | 2.33998500  | 1.14427700  |
| H | 1.01808800  | 1.68156600  | 1.81610300  |
| C | 3.64944400  | 3.17471300  | 0.27850900  |
| H | 3.48696500  | 4.63412800  | -1.29619300 |
| H | 3.47723800  | 1.70932000  | 1.84659000  |
| C | -7.27086300 | -2.15896700 | 0.98433800  |
| C | -8.46856400 | -2.51391400 | 0.34207400  |
| C | -6.66380600 | -3.10799300 | 1.82304700  |
| C | -9.03804200 | -3.76984400 | 0.53263200  |
| H | -8.94580500 | -1.80978500 | -0.32955500 |
| C | -7.23333200 | -4.36413100 | 2.01251600  |
| H | -5.75142400 | -2.85392500 | 2.34997500  |
| C | -8.42333100 | -4.70146100 | 1.36857600  |
| H | -9.95906300 | -4.02377500 | 0.02003700  |
| H | -6.75047200 | -5.07746300 | 2.67092700  |
| C | -5.70455500 | 4.10429300  | -0.20733400 |
| C | -5.79712900 | 5.26672500  | 0.62670100  |
| C | -6.42118800 | 4.02746000  | -1.47350600 |
| C | -5.25094800 | 5.33743400  | 1.91846000  |
| C | -6.52935000 | 6.40373100  | 0.12055400  |
| C | -7.09708900 | 5.11664100  | -1.93588900 |
| H | -6.34473900 | 3.11939900  | -2.05816300 |
| C | -5.36479000 | 6.52031300  | 2.70817200  |
| H | -4.73619400 | 4.47716700  | 2.32755500  |
| C | -6.63025300 | 7.55322000  | 0.92290100  |
| C | -7.15252600 | 6.31902100  | -1.15823500 |
| H | -7.59022400 | 5.08511400  | -2.90055400 |
| C | -6.03752700 | 7.61198600  | 2.21715700  |
| H | -4.91227000 | 6.54430100  | 3.69268200  |
| H | -7.18224200 | 8.40741200  | 0.54624600  |
| H | -7.69989700 | 7.17660500  | -1.53175500 |
| H | -6.12783800 | 8.51814100  | 2.80497600  |
| H | -8.86654000 | -5.67953000 | 1.51633500  |
| H | 4.73307200  | 3.19169800  | 0.29761500  |

T<sub>CT-Naph</sub> geometry (Å) (B3LYP/6-311G(d,p))

|   |             |             |             |
|---|-------------|-------------|-------------|
| C | -6.58532000 | -0.54048100 | 0.95346400  |
| C | -5.18863300 | -0.43332500 | 0.91594900  |
| C | -4.57188500 | 0.77866600  | 0.64896700  |
| C | -5.31566900 | 1.94631500  | 0.41513300  |
| C | -6.70959900 | 1.83295700  | 0.42262900  |
| C | -7.32950200 | 0.61881600  | 0.69176900  |
| C | -3.23798600 | 3.13979400  | 0.08795200  |
| C | -2.54091700 | 1.93672500  | 0.29866800  |
| C | -1.15931600 | 1.88372300  | 0.24694700  |
| H | -0.68761400 | 0.92003100  | 0.39229800  |
| C | -0.39982500 | 3.03689900  | -0.00558400 |
| C | -1.09073700 | 4.24449100  | -0.17799400 |
| C | -2.47797900 | 4.29841100  | -0.12059000 |
| H | -4.55319200 | -1.29771700 | 1.06262700  |

|   |             |             |             |
|---|-------------|-------------|-------------|
| H | -7.31341100 | 2.70598700  | 0.22223900  |
| H | -2.98191000 | 5.24959700  | -0.22153000 |
| H | -8.41154600 | 0.58395600  | 0.71459300  |
| H | -0.54107200 | 5.16613100  | -0.32226300 |
| N | -4.64260600 | 3.15731100  | 0.13461300  |
| O | -3.19589600 | 0.76147300  | 0.58315800  |
| C | 1.08069900  | 2.97780100  | -0.06321700 |
| C | 1.79934300  | 3.79920500  | -0.94743200 |
| C | 1.80476200  | 2.10146400  | 0.76167600  |
| C | 3.18938100  | 3.74693100  | -1.00333100 |
| H | 1.26520800  | 4.46737300  | -1.61294400 |
| C | 3.19476700  | 2.04899500  | 0.70459600  |
| H | 1.27859200  | 1.47216600  | 1.47008200  |
| C | 3.89422500  | 2.87150700  | -0.17786400 |
| H | 3.72188200  | 4.38521200  | -1.69943000 |
| H | 3.73240000  | 1.36988600  | 1.35671800  |
| C | -7.24416500 | -1.83632200 | 1.24866900  |
| C | -8.45007600 | -2.19208000 | 0.62294500  |
| C | -6.68029200 | -2.74245800 | 2.16139400  |
| C | -9.06924700 | -3.40764500 | 0.90092800  |
| H | -8.89540900 | -1.52287300 | -0.10397200 |
| C | -7.29918300 | -3.95859300 | 2.43804100  |
| H | -5.76186800 | -2.48428200 | 2.67589800  |
| C | -8.49694000 | -4.29727000 | 1.80954700  |
| H | -9.99597700 | -3.66362900 | 0.39973400  |
| H | -6.84862800 | -4.63886900 | 3.15202500  |
| C | -5.34180400 | 4.32731000  | -0.25452400 |
| C | -6.17970900 | 5.03292800  | 0.67036400  |
| C | -5.19005800 | 4.78188000  | -1.63047700 |
| C | -6.24740600 | 4.72906700  | 2.03976200  |
| C | -6.95852800 | 6.13954500  | 0.16657000  |
| C | -5.94320100 | 5.82207000  | -2.08646100 |
| H | -4.52522800 | 4.23477300  | -2.28691500 |
| C | -7.10245000 | 5.45715900  | 2.91959500  |
| H | -5.63653200 | 3.92924700  | 2.43915400  |
| C | -7.78761000 | 6.84241600  | 1.05750400  |
| C | -6.84292500 | 6.50618100  | -1.20582900 |
| H | -5.87454600 | 6.13384300  | -3.12225000 |
| C | -7.86441500 | 6.49235500  | 2.43640500  |
| H | -7.14330400 | 5.18006800  | 3.96657700  |
| H | -8.37157400 | 7.67573800  | 0.68231100  |
| H | -7.43126200 | 7.33716800  | -1.57715600 |
| H | -8.52129900 | 7.05092800  | 3.09313000  |
| H | -8.97885800 | -5.24394500 | 2.02514000  |
| H | 4.97646700  | 2.83049000  | -0.22200700 |

## S16 Coordinates of the optimized geometries of molecule 2

S<sub>0</sub> geometry (Å) (B3LYP/6-311G(d,p))

|   |             |             |            |
|---|-------------|-------------|------------|
| C | -1.66491800 | -4.30680000 | 1.05994700 |
| C | -2.36690200 | -3.15506500 | 0.71038400 |
| C | -1.69732500 | -1.98653100 | 0.33879600 |
| C | -0.29222900 | -2.01922800 | 0.32969700 |

|   |             |              |             |
|---|-------------|--------------|-------------|
| C | 0.40482700  | -3.16215600  | 0.67347100  |
| C | -0.26661300 | -4.33906200  | 1.05019700  |
| C | -0.20343200 | 0.24078400   | -0.39250900 |
| C | -1.60676600 | 0.31958000   | -0.39774200 |
| C | -2.18301800 | 1.53178200   | -0.78556300 |
| H | -3.26068500 | 1.62177200   | -0.81115800 |
| C | -1.39313000 | 2.61987500   | -1.15093600 |
| C | 0.58078100  | 1.31869000   | -0.75790200 |
| H | -2.22646600 | -5.19592600  | 1.31894000  |
| H | -3.44854800 | -3.16663000  | 0.71666000  |
| H | 1.48663300  | -3.11124300  | 0.66516300  |
| H | -1.88378300 | 3.53239800   | -1.46646600 |
| H | 1.65581900  | 1.19563600   | -0.71100100 |
| N | -2.36236000 | -0.80010900  | -0.01241700 |
| O | 0.45981400  | -0.90963300  | -0.00823700 |
| C | 0.48614200  | -5.56195800  | 1.41633300  |
| C | 0.00923800  | -6.44376700  | 2.39955800  |
| C | 1.70305000  | -5.88513000  | 0.79498000  |
| C | 0.71303400  | -7.59172300  | 2.74234600  |
| H | -0.91805400 | -6.22279700  | 2.91528700  |
| C | 2.40741600  | -7.03249400  | 1.13916200  |
| H | 2.10002500  | -5.23876800  | 0.02079100  |
| C | 1.92958300  | -7.91373800  | 2.12112300  |
| H | 0.30374500  | -8.25367400  | 3.49684400  |
| H | 3.35022200  | -7.23834000  | 0.64550600  |
| C | 2.68269700  | -9.13907100  | 2.48981700  |
| C | 2.72421000  | -9.58887000  | 3.81946500  |
| C | 3.37432100  | -9.88186400  | 1.51928600  |
| C | 3.43043100  | -10.73802400 | 4.16544900  |
| H | 2.21788000  | -9.02262100  | 4.59271700  |
| C | 4.08092300  | -11.03075800 | 1.86539800  |
| H | 3.34108400  | -9.57014500  | 0.48166800  |
| C | 4.11242200  | -11.46475300 | 3.19017600  |
| H | 3.45418700  | -11.06135800 | 5.20013800  |
| H | 4.60097800  | -11.59195500 | 1.09709300  |
| C | 0.00332800  | 2.54081800   | -1.14624100 |
| H | 4.66234800  | -12.35920000 | 3.45954400  |
| C | -3.79763200 | -0.75134900  | -0.03650000 |
| C | -4.50987800 | -0.34888600  | 1.13302000  |
| C | -4.46781900 | -1.09358100  | -1.18812900 |
| C | -5.94093800 | -0.31067100  | 1.07466300  |
| C | -3.86284000 | 0.01271800   | 2.34385300  |
| C | -5.87929800 | -1.05372500  | -1.23729700 |
| H | -3.90101100 | -1.39538000  | -2.06099800 |
| C | -6.59780800 | -0.67099800  | -0.13111100 |
| C | -6.66431900 | 0.08829800   | 2.23006800  |
| C | -4.59576400 | 0.39363100   | 3.44273400  |
| H | -2.78160900 | -0.01495800  | 2.39254300  |
| H | -6.38778600 | -1.32734400  | -2.15404900 |
| H | -7.68139900 | -0.63906800  | -0.16432100 |
| C | -6.00893700 | 0.43250100   | 3.38733200  |
| H | -7.74747700 | 0.11632700   | 2.18162700  |
| H | -4.08906900 | 0.66719900   | 4.36108400  |
| H | -6.57173200 | 0.73528100   | 4.26272700  |

|   |             |             |             |
|---|-------------|-------------|-------------|
| C | 0.84859900  | 3.69300100  | -1.53822800 |
| C | 0.45593800  | 5.01221800  | -1.25983100 |
| C | 2.07193200  | 3.51034500  | -2.20284000 |
| C | 1.24505000  | 6.09393500  | -1.63092000 |
| H | -0.46480500 | 5.19524900  | -0.71822000 |
| C | 2.86236100  | 4.59230900  | -2.57104900 |
| H | 2.39784200  | 2.51011200  | -2.46377600 |
| C | 2.46781300  | 5.91049900  | -2.29509500 |
| H | 0.92011800  | 7.09496500  | -1.37148500 |
| H | 3.78559800  | 4.40977200  | -3.10886500 |
| C | 3.31173300  | 7.06649800  | -2.68960000 |
| C | 2.73210400  | 8.26628300  | -3.13296700 |
| C | 4.71279900  | 6.99199100  | -2.63058200 |
| C | 3.52353700  | 9.35061900  | -3.50292400 |
| H | 1.65367100  | 8.34408100  | -3.20983800 |
| C | 5.50425200  | 8.07600000  | -3.00146000 |
| H | 5.18653800  | 6.08585200  | -2.27079000 |
| C | 4.91361800  | 9.26083900  | -3.43932700 |
| H | 3.05314800  | 10.26414200 | -3.84918700 |
| H | 6.58394200  | 7.99717200  | -2.94032200 |
| H | 5.52971600  | 10.10480800 | -3.72770400 |

S<sub>CT-Naph</sub> geometry (Å) (B3LYP/6-311G(d,p))

|   |             |             |             |
|---|-------------|-------------|-------------|
| C | -1.65381000 | -4.27481300 | 1.04660900  |
| C | -2.35088800 | -3.14037200 | 0.69305900  |
| C | -1.66352800 | -1.97947700 | 0.29288100  |
| C | -0.25022100 | -2.02646700 | 0.26655900  |
| C | 0.44729700  | -3.16935600 | 0.62052800  |
| C | -0.23869500 | -4.31998800 | 1.01873900  |
| C | -0.16213700 | 0.21173100  | -0.45148800 |
| C | -1.57417600 | 0.28995000  | -0.43459900 |
| C | -2.16765000 | 1.51327600  | -0.79711000 |
| H | -3.24540800 | 1.58401900  | -0.80075000 |
| C | -1.38342200 | 2.58943800  | -1.15053900 |
| C | 0.62310700  | 1.29482800  | -0.80986200 |
| H | -2.21017100 | -5.15879300 | 1.32862100  |
| H | -3.43076400 | -3.12314100 | 0.70611300  |
| H | 1.52812900  | -3.12954900 | 0.60080200  |
| H | -1.86852000 | 3.51050600  | -1.44529800 |
| H | 1.69765500  | 1.17400100  | -0.77809900 |
| N | -2.31987700 | -0.81642300 | -0.06824200 |
| O | 0.48171100  | -0.93737700 | -0.10150700 |
| C | 0.49100100  | -5.54852400 | 1.39493700  |
| C | -0.01192600 | -6.41794400 | 2.37640600  |
| C | 1.71106500  | -5.88463300 | 0.78614900  |
| C | 0.67860000  | -7.56705800 | 2.73689800  |
| H | -0.94284200 | -6.18669700 | 2.87988600  |
| C | 2.39584700  | -7.03803500 | 1.14261300  |
| H | 2.12240600  | -5.24900600 | 0.01119000  |
| C | 1.89739900  | -7.90501100 | 2.12809400  |
| H | 0.25580200  | -8.21921500 | 3.49174300  |
| H | 3.33940100  | -7.25995600 | 0.65851500  |
| C | 2.63279400  | -9.13535500 | 2.51227200  |



|   |             |              |             |
|---|-------------|--------------|-------------|
| C | 2.65391700  | -9.57555100  | 3.84544300  |
| C | 3.32652000  | -9.89025800  | 1.55291200  |
| C | 3.34529900  | -10.72881800 | 4.20626700  |
| H | 2.14536100  | -8.99897800  | 4.60938500  |
| C | 4.01583500  | -11.04469700 | 1.91402800  |
| H | 3.30765400  | -9.58504400  | 0.51312400  |
| C | 4.02885800  | -11.46895200 | 3.24225300  |
| H | 3.35561500  | -11.04538600 | 5.24310900  |
| H | 4.53737400  | -11.61714400 | 1.15530200  |
| C | 0.03019600  | 2.50884700   | -1.16719600 |
| H | 4.56636900  | -12.36728200 | 3.52327900  |
| C | -3.76847900 | -0.75776100  | -0.06317700 |
| C | -4.43249700 | -0.35904800  | 1.13303400  |
| C | -4.45167100 | -1.10130200  | -1.25482300 |
| C | -5.88155900 | -0.31578100  | 1.08927500  |
| C | -3.77521900 | -0.01105700  | 2.33579000  |
| C | -5.83569800 | -1.05025500  | -1.26754700 |
| H | -3.88821300 | -1.39703100  | -2.13163900 |
| C | -6.54827100 | -0.66521500  | -0.12027600 |
| C | -6.57152400 | 0.07502000   | 2.26114800  |
| C | -4.50255400 | 0.37220700   | 3.47858700  |
| H | -2.69293300 | -0.03856500  | 2.38360100  |
| H | -6.37250000 | -1.31086300  | -2.17367000 |
| H | -7.63221800 | -0.62869200  | -0.14203400 |
| C | -5.88993700 | 0.41433600   | 3.44003300  |
| H | -7.65630700 | 0.10866400   | 2.23356800  |
| H | -3.97103200 | 0.63370300   | 4.38736700  |
| H | -6.45190000 | 0.70960000   | 4.32017500  |
| C | 0.85393800  | 3.67271500   | -1.55459800 |
| C | 0.43472300  | 4.98291600   | -1.27206600 |
| C | 2.08242000  | 3.50690600   | -2.21458200 |
| C | 1.21239200  | 6.07625900   | -1.62844900 |
| H | -0.49124000 | 5.15144900   | -0.73564700 |
| C | 2.85486400  | 4.60175700   | -2.57643500 |
| H | 2.42328000  | 2.51361100   | -2.48103100 |
| C | 2.43940100  | 5.91215900   | -2.29036300 |
| H | 0.87359300  | 7.07058600   | -1.36325600 |
| H | 3.78047600  | 4.43696900   | -3.11485400 |
| C | 3.26774400  | 7.08192000   | -2.67468300 |
| C | 2.67117800  | 8.27697700   | -3.10756900 |
| C | 4.66934500  | 7.02346100   | -2.61485500 |
| C | 3.44875500  | 9.37400000   | -3.46843500 |
| H | 1.59199300  | 8.34137500   | -3.18463000 |
| C | 5.44635000  | 8.12142200   | -2.97408000 |
| H | 5.15465400  | 6.12052500   | -2.26283600 |
| C | 4.83973100  | 9.30145000   | -3.40292700 |
| H | 2.96717800  | 10.28400000  | -3.80806200 |
| H | 6.52678500  | 8.05698800   | -2.91184400 |
| H | 5.44487600  | 10.15592900  | -3.68323600 |

SCT-Biph geometry (Å) (B3LYP/6-311G(d,p))

|   |             |             |            |
|---|-------------|-------------|------------|
| C | -1.65372800 | -4.27475700 | 1.04692800 |
| C | -2.35084100 | -3.14034800 | 0.69336100 |

|   |             |              |             |
|---|-------------|--------------|-------------|
| C | -1.66352900 | -1.97949100  | 0.29295000  |
| C | -0.25021000 | -2.02650900  | 0.26642800  |
| C | 0.44733300  | -3.16938300  | 0.62037900  |
| C | -0.23862500 | -4.31996200  | 1.01881900  |
| C | -0.16218600 | 0.21167900   | -0.45166700 |
| C | -1.57423800 | 0.28992600   | -0.43458000 |
| C | -2.16771800 | 1.51331200   | -0.79692700 |
| H | -3.24547500 | 1.58407200   | -0.80041400 |
| C | -1.38350800 | 2.58947500   | -1.15038000 |
| C | 0.62302700  | 1.29477400   | -0.81009000 |
| H | -2.21003500 | -5.15870800  | 1.32914700  |
| H | -3.43071500 | -3.12307700  | 0.70657200  |
| H | 1.52816400  | -3.12965600  | 0.60049000  |
| H | -1.86859600 | 3.51059800   | -1.44499200 |
| H | 1.69758200  | 1.17396100   | -0.77850600 |
| N | -2.31989400 | -0.81646700  | -0.06822500 |
| O | 0.48162200  | -0.93747200  | -0.10187300 |
| C | 0.49111200  | -5.54848200  | 1.39500100  |
| C | -0.01158600 | -6.41769700  | 2.37677100  |
| C | 1.71097600  | -5.88475400  | 0.78591300  |
| C | 0.67898700  | -7.56677600  | 2.73727700  |
| H | -0.94234800 | -6.18628400  | 2.88045900  |
| C | 2.39580300  | -7.03812500  | 1.14239000  |
| H | 2.12210100  | -5.24927400  | 0.01072100  |
| C | 1.89759600  | -7.90488800  | 2.12817900  |
| H | 0.25640200  | -8.21877700  | 3.49237700  |
| H | 3.33920500  | -7.26020500  | 0.65806600  |
| C | 2.63305900  | -9.13519000  | 2.51238200  |
| C | 2.65460500  | -9.57508900  | 3.84564300  |
| C | 3.32643000  | -9.89033700  | 1.55295800  |
| C | 3.34605700  | -10.72830600 | 4.20649600  |
| H | 2.14633000  | -8.99831400  | 4.60962100  |
| C | 4.01581600  | -11.04472400 | 1.91410400  |
| H | 3.30722500  | -9.58535100  | 0.51311100  |
| C | 4.02926400  | -11.46868100 | 3.24241900  |
| H | 3.35670900  | -11.04464300 | 5.24340400  |
| H | 4.53707900  | -11.61736700 | 1.15533500  |
| C | 0.03009900  | 2.50884100   | -1.16724700 |
| H | 4.56683000  | -12.36697300 | 3.52346600  |
| C | -3.76847700 | -0.75785300  | -0.06318100 |
| C | -4.43262400 | -0.35920600  | 1.13300700  |
| C | -4.45166600 | -1.10128700  | -1.25489400 |
| C | -5.88165700 | -0.31597700  | 1.08916000  |
| C | -3.77539000 | -0.01126800  | 2.33578600  |
| C | -5.83567800 | -1.05026300  | -1.26767700 |
| H | -3.88819500 | -1.39694500  | -2.13172500 |
| C | -6.54836300 | -0.66533200  | -0.12041500 |
| C | -6.57171400 | 0.07473700   | 2.26102800  |
| C | -4.50279600 | 0.37190500   | 3.47857300  |
| H | -2.69310900 | -0.03873400  | 2.38362900  |
| H | -6.37240400 | -1.31080900  | -2.17387100 |
| H | -7.63229900 | -0.62881800  | -0.14218400 |
| C | -5.89018600 | 0.41398800   | 3.43994400  |
| H | -7.65649200 | 0.10835300   | 2.23336400  |

|   |             |             |             |
|---|-------------|-------------|-------------|
| H | -3.97135600 | 0.63336300  | 4.38741100  |
| H | -6.45217800 | 0.70917900  | 4.32009500  |
| C | 0.85381800  | 3.67270900  | -1.55468800 |
| C | 0.43473700  | 4.98289400  | -1.27186700 |
| C | 2.08213900  | 3.50690600  | -2.21496700 |
| C | 1.21239900  | 6.07623700  | -1.62825500 |
| H | -0.49110200 | 5.15137700  | -0.73521500 |
| C | 2.85457600  | 4.60176200  | -2.57682400 |
| H | 2.42284900  | 2.51362000  | -2.48164300 |
| C | 2.43925500  | 5.91214100  | -2.29045400 |
| H | 0.87375200  | 7.07055900  | -1.36284700 |
| H | 3.78005900  | 4.43702900  | -3.11548200 |
| C | 3.26760500  | 7.08190500  | -2.67477100 |
| C | 2.67102800  | 8.27702300  | -3.10746700 |
| C | 4.66920900  | 7.02337100  | -2.61512400 |
| C | 3.44860700  | 9.37404500  | -3.46833300 |
| H | 1.59183400  | 8.34146000  | -3.18437200 |
| C | 5.44621500  | 8.12133200  | -2.97434900 |
| H | 5.15450900  | 6.12037200  | -2.26325500 |
| C | 4.83958800  | 9.30142400  | -3.40300900 |
| H | 2.96703500  | 10.28410100 | -3.80781900 |
| H | 6.52665500  | 8.05685600  | -2.91225500 |
| H | 5.44473500  | 10.15590200 | -3.68331700 |

T<sub>CT-Biph</sub> geometry (Å) (B3LYP/6-311G(d,p))

|   |             |             |             |
|---|-------------|-------------|-------------|
| C | -1.67802900 | -4.29244400 | 1.06770500  |
| C | -2.37858000 | -3.15066800 | 0.73224100  |
| C | -1.70174500 | -1.98415500 | 0.33147900  |
| C | -0.29009500 | -2.02948000 | 0.28290400  |
| C | 0.40745500  | -3.17901300 | 0.61847100  |
| C | -0.26536000 | -4.33908600 | 1.01952000  |
| C | -0.18055500 | 0.22647000  | -0.42820300 |
| C | -1.61805300 | 0.30742200  | -0.39819400 |
| C | -2.19810900 | 1.54851200  | -0.76426800 |
| H | -3.27548600 | 1.64766500  | -0.75512500 |
| C | -1.42399300 | 2.61316100  | -1.12847200 |
| C | 0.60110700  | 1.28360800  | -0.79202500 |
| H | -2.23564500 | -5.17687500 | 1.34768800  |
| H | -3.45932800 | -3.15217500 | 0.76555200  |
| H | 1.48855300  | -3.13667300 | 0.58232600  |
| H | -1.92531700 | 3.53065200  | -1.39953600 |
| H | 1.67006900  | 1.12381700  | -0.78079000 |
| N | -2.34954700 | -0.80507300 | -0.01325300 |
| O | 0.44953900  | -0.93835600 | -0.08438700 |
| C | 0.47574300  | -5.56662200 | 1.37690200  |
| C | -0.01852900 | -6.46220400 | 2.34082300  |
| C | 1.70212900  | -5.88510200 | 0.76862000  |
| C | 0.67971200  | -7.61341900 | 2.68074000  |
| H | -0.95293100 | -6.24934200 | 2.84645100  |
| C | 2.39807400  | -7.03753000 | 1.10806100  |
| H | 2.11164700  | -5.23269900 | 0.00643700  |
| C | 1.90506000  | -7.93016700 | 2.07330200  |
| H | 0.25808700  | -8.28367800 | 3.42076900  |

|   |             |              |             |
|---|-------------|--------------|-------------|
| H | 3.34664600  | -7.23941500  | 0.62420700  |
| C | 2.65027900  | -9.16076200  | 2.43713500  |
| C | 2.66293300  | -9.63323100  | 3.75974100  |
| C | 3.36394300  | -9.88653500  | 1.46936700  |
| C | 3.36281900  | -10.78734000 | 4.10144500  |
| H | 2.13961300  | -9.08068300  | 4.53152800  |
| C | 4.06362400  | -11.04070100 | 1.81135400  |
| H | 3.35308200  | -9.55782100  | 0.43658900  |
| C | 4.06671000  | -11.49695800 | 3.12905400  |
| H | 3.36449800  | -11.12805600 | 5.13078400  |
| H | 4.60075000  | -11.58854400 | 1.04519800  |
| C | 0.03587700  | 2.54716100   | -1.16572800 |
| H | 4.61159700  | -12.39542100 | 3.39519700  |
| C | -3.79391900 | -0.74240000  | 0.01257000  |
| C | -4.45494800 | -0.34544800  | 1.21033200  |
| C | -4.49233100 | -1.06759300  | -1.12476900 |
| C | -5.88684800 | -0.29846800  | 1.19429200  |
| C | -3.76781900 | 0.00091300   | 2.40336000  |
| C | -5.90391700 | -1.01697200  | -1.12766700 |
| H | -3.95352200 | -1.36343500  | -2.01674600 |
| C | -6.58268300 | -0.64173400  | 0.00574300  |
| C | -6.57222200 | 0.09321100   | 2.37486100  |
| C | -4.46602400 | 0.37519300   | 3.52661300  |
| H | -2.68572300 | -0.03030700  | 2.42408500  |
| H | -6.44258800 | -1.27692800  | -2.03063900 |
| H | -7.66634100 | -0.60240900  | 0.00756900  |
| C | -5.87988900 | 0.42219000   | 3.51454300  |
| H | -7.65597000 | 0.12799200   | 2.35900400  |
| H | -3.93001200 | 0.63759700   | 4.43126900  |
| H | -6.41371800 | 0.71968100   | 4.40949200  |
| C | 0.83645900  | 3.65932000   | -1.54627600 |
| C | 0.27076400  | 4.93354400   | -1.89560100 |
| C | 2.27078600  | 3.59627200   | -1.61035600 |
| C | 1.04890100  | 6.00517300   | -2.26481000 |
| H | -0.80069800 | 5.07847000   | -1.85867900 |
| C | 3.03743600  | 4.67573700   | -1.97325100 |
| H | 2.78066600  | 2.66932400   | -1.38134000 |
| C | 2.46627200  | 5.93260900   | -2.32032000 |
| H | 0.55388500  | 6.94330300   | -2.48806900 |
| H | 4.11229700  | 4.54599100   | -2.02516500 |
| C | 3.29024100  | 7.08003000   | -2.71013800 |
| C | 2.76794300  | 8.13396300   | -3.49486600 |
| C | 4.64490000  | 7.18525000   | -2.31894500 |
| C | 3.55041900  | 9.22217600   | -3.86188700 |
| H | 1.74371400  | 8.08617000   | -3.84458600 |
| C | 5.42483600  | 8.27432200   | -2.68935900 |
| H | 5.08428500  | 6.41753600   | -1.69356400 |
| C | 4.88663200  | 9.30423000   | -3.46383500 |
| H | 3.11744900  | 10.00794300  | -4.47172200 |
| H | 6.45821600  | 8.32479200   | -2.36320300 |
| H | 5.49592800  | 10.15315900  | -3.75155000 |

T<sub>CT-Naph</sub> geometry (Å) (B3LYP/6-311G(d,p))

|   |             |             |            |
|---|-------------|-------------|------------|
| C | -1.60567800 | -4.35065900 | 1.29097600 |
|---|-------------|-------------|------------|

|   |             |              |             |
|---|-------------|--------------|-------------|
| C | -2.31722700 | -3.19407800  | 0.99712700  |
| C | -1.66783400 | -2.04774300  | 0.51995200  |
| C | -0.26675900 | -2.09697700  | 0.40623400  |
| C | 0.44259500  | -3.24623600  | 0.70499000  |
| C | -0.21250900 | -4.40817500  | 1.14426500  |
| C | -0.20472100 | 0.17118000   | -0.25716300 |
| C | -1.60420300 | 0.26253300   | -0.19042900 |
| C | -2.18857400 | 1.47411800   | -0.57391800 |
| H | -3.26511800 | 1.56404900   | -0.58035700 |
| C | -1.40823500 | 2.55668600   | -0.95933100 |
| C | 0.57533900  | 1.25001200   | -0.64185200 |
| H | -2.15152200 | -5.22236100  | 1.62910700  |
| H | -3.38912600 | -3.17499100  | 1.13628000  |
| H | 1.52093800  | -3.20777600  | 0.61621400  |
| H | -1.90415900 | 3.46897100   | -1.26633000 |
| H | 1.64946700  | 1.11378500   | -0.64842900 |
| N | -2.35850200 | -0.86494700  | 0.20463000  |
| O | 0.46742100  | -0.99576200  | 0.03228500  |
| C | 0.54954100  | -5.64000100  | 1.45360500  |
| C | 0.14370800  | -6.51019400  | 2.47809300  |
| C | 1.70486400  | -5.98214200  | 0.73290400  |
| C | 0.85802300  | -7.66621000  | 2.76641700  |
| H | -0.73302000 | -6.27417100  | 3.06965600  |
| C | 2.41816600  | -7.13886900  | 1.02136200  |
| H | 2.04414400  | -5.34458000  | -0.07515500 |
| C | 2.01223200  | -8.00865900  | 2.04510400  |
| H | 0.50502200  | -8.31894400  | 3.55638000  |
| H | 3.31231200  | -7.36116500  | 0.45058500  |
| C | 2.77547800  | -9.24398400  | 2.35402300  |
| C | 2.92381200  | -9.68940600  | 3.67742200  |
| C | 3.36991600  | -10.00037800 | 1.33114200  |
| C | 3.63984200  | -10.84797900 | 3.96696400  |
| H | 2.49449400  | -9.11261700  | 4.48853700  |
| C | 4.08587200  | -11.15893900 | 1.62087300  |
| H | 3.25220700  | -9.69183300  | 0.29874800  |
| C | 4.22445200  | -11.58844000 | 2.94019700  |
| H | 3.74761000  | -11.16805600 | 4.99729100  |
| H | 4.52936400  | -11.73094000 | 0.81355500  |
| C | -0.00811400 | 2.47490500   | -0.99319600 |
| H | 4.78189400  | -12.49032900 | 3.16571600  |
| C | -3.77500700 | -0.87244600  | 0.15180400  |
| C | -4.55634800 | -0.06062400  | 1.03863300  |
| C | -4.41028000 | -1.72941300  | -0.84021600 |
| C | -5.98642800 | -0.02996500  | 0.84093000  |
| C | -4.00811000 | 0.66628600   | 2.10771500  |
| C | -5.76063100 | -1.67580100  | -1.01580000 |
| H | -3.78241000 | -2.34720700  | -1.46983200 |
| C | -6.56494700 | -0.82195300  | -0.19292300 |
| C | -6.76977600 | 0.76075300   | 1.69913900  |
| C | -4.82798000 | 1.46451600   | 2.95961500  |
| H | -2.94252100 | 0.61943900   | 2.29388000  |
| H | -6.23576700 | -2.27170800  | -1.78645000 |
| H | -7.63886700 | -0.79307800  | -0.33583000 |
| C | -6.18500100 | 1.51635000   | 2.75564600  |

|   |             |             |             |
|---|-------------|-------------|-------------|
| H | -7.84442400 | 0.78288300  | 1.55464200  |
| H | -4.36575100 | 2.02791400  | 3.76183200  |
| H | -6.81870600 | 2.12226400  | 3.39290000  |
| C | 0.82423700  | 3.62987900  | -1.40290700 |
| C | 0.43935100  | 4.94540200  | -1.09891300 |
| C | 2.02473500  | 3.45274700  | -2.10885500 |
| C | 1.21666400  | 6.03074900  | -1.48358900 |
| H | -0.46382300 | 5.12260800  | -0.52674500 |
| C | 2.80194900  | 4.53852000  | -2.49250100 |
| H | 2.34151800  | 2.45533400  | -2.39067300 |
| C | 2.41665200  | 5.85363300  | -2.18952500 |
| H | 0.90079400  | 7.02901800  | -1.20356700 |
| H | 3.70649100  | 4.36205200  | -3.06291900 |
| C | 3.24724800  | 7.01359600  | -2.60013800 |
| C | 2.65325400  | 8.21715800  | -3.01283000 |
| C | 4.64935400  | 6.93858500  | -2.58704500 |
| C | 3.43231300  | 9.30513900  | -3.39781000 |
| H | 1.57291800  | 8.29518600  | -3.05417600 |
| C | 5.42833600  | 8.02646200  | -2.97246500 |
| H | 5.13434600  | 6.02912700  | -2.25150300 |
| C | 4.82367500  | 9.21513300  | -3.37961200 |
| H | 2.95108100  | 10.22175700 | -3.72009300 |
| H | 6.50942200  | 7.94756100  | -2.94681200 |
| H | 5.43012200  | 10.06207600 | -3.67948100 |

T<sub>LE-Naph</sub> geometry (Å) (B3LYP/6-311G(d,p))

|   |             |             |             |
|---|-------------|-------------|-------------|
| C | -1.59889500 | -4.35306800 | 1.29386500  |
| C | -2.31268800 | -3.19765600 | 1.00073500  |
| C | -1.66585000 | -2.05046600 | 0.52218800  |
| C | -0.26487700 | -2.09759300 | 0.40620300  |
| C | 0.44672400  | -3.24565600 | 0.70413500  |
| C | -0.20587900 | -4.40846900 | 1.14493500  |
| C | -0.20734100 | 0.17051500  | -0.25778300 |
| C | -1.60685300 | 0.25976200  | -0.18881800 |
| C | -2.19364800 | 1.47036500  | -0.57167600 |
| H | -3.27033800 | 1.55871200  | -0.57654200 |
| C | -1.41556100 | 2.55408100  | -0.95853300 |
| C | 0.57047800  | 1.25043200  | -0.64388800 |
| H | -2.14291100 | -5.22542900 | 1.63323800  |
| H | -3.38440300 | -3.18028200 | 1.14155300  |
| H | 1.52485000  | -3.20558800 | 0.61338900  |
| H | -1.91343600 | 3.46551500  | -1.26489200 |
| H | 1.64478300  | 1.11570100  | -0.65228700 |
| N | -2.35875400 | -0.86876500 | 0.20777400  |
| O | 0.46699300  | -0.99538400 | 0.03071200  |
| C | 0.55862100  | -5.63896600 | 1.45359500  |
| C | 0.15539400  | -6.50969700 | 2.47869100  |
| C | 1.71378900  | -5.97924100 | 0.73171600  |
| C | 0.87205900  | -7.66440000 | 2.76650400  |
| H | -0.72113900 | -6.27519400 | 3.07113700  |
| C | 2.42944000  | -7.13467100 | 1.01965000  |
| H | 2.05116800  | -5.34131300 | -0.07683600 |
| C | 2.02614900  | -8.00497400 | 2.04404500  |

|   |             |              |             |
|---|-------------|--------------|-------------|
| H | 0.52100300  | -8.31744300  | 3.55706300  |
| H | 3.32327400  | -7.35546100  | 0.44780700  |
| C | 2.79196200  | -9.23885900  | 2.35250000  |
| C | 2.94110200  | -9.68458300  | 3.67574800  |
| C | 3.38814000  | -9.99355900  | 1.32933500  |
| C | 3.65958200  | -10.84177200 | 3.96485300  |
| H | 2.51038700  | -9.10923500  | 4.48713600  |
| C | 4.10654000  | -11.15073900 | 1.61863700  |
| H | 3.27003800  | -9.68482300  | 0.29705400  |
| C | 4.24591200  | -11.58053500 | 2.93781000  |
| H | 3.76787100  | -11.16208700 | 4.99504400  |
| H | 4.55135900  | -11.72139400 | 0.81110600  |
| C | -0.01536600 | 2.47443100   | -0.99455800 |
| H | 4.80525100  | -12.48132700 | 3.16299100  |
| C | -3.77535300 | -0.87825600  | 0.15752000  |
| C | -4.55610700 | -0.06755800  | 1.04590800  |
| C | -4.41133000 | -1.73595400  | -0.83336000 |
| C | -5.98663200 | -0.03885900  | 0.85098800  |
| C | -4.00674400 | 0.65996300   | 2.11398000  |
| C | -5.76208500 | -1.68425100  | -1.00631500 |
| H | -3.78380800 | -2.35270000  | -1.46434800 |
| C | -6.56609400 | -0.83161100  | -0.18167600 |
| C | -6.76941300 | 0.75079900   | 1.71077700  |
| C | -4.82606500 | 1.45711400   | 2.96756600  |
| H | -2.94075100 | 0.61443100   | 2.29815600  |
| H | -6.23790500 | -2.28063700  | -1.77616100 |
| H | -7.64033500 | -0.80440800  | -0.32240800 |
| C | -6.18354000 | 1.50715600   | 2.76620000  |
| H | -7.84436300 | 0.77148300   | 1.56840300  |
| H | -4.36302500 | 2.02110300   | 3.76889000  |
| H | -6.81680500 | 2.11224000   | 3.40466800  |
| C | 0.81464300  | 3.63055400   | -1.40583100 |
| C | 0.42741200  | 4.94573000   | -1.10314100 |
| C | 2.01524900  | 3.45494600   | -2.11204200 |
| C | 1.20254400  | 6.03213400   | -1.48928500 |
| H | -0.47590100 | 5.12199400   | -0.53092300 |
| C | 2.79028400  | 4.54177700   | -2.49715500 |
| H | 2.33395600  | 2.45788500   | -2.39288200 |
| C | 2.40264400  | 5.85653200   | -2.19547700 |
| H | 0.88474700  | 7.03005700   | -1.21024200 |
| H | 3.69498200  | 4.36625200   | -3.06759900 |
| C | 3.23097600  | 7.01761500   | -2.60757800 |
| C | 2.63465900  | 8.22029500   | -3.01961300 |
| C | 4.63324100  | 6.94459200   | -2.59657400 |
| C | 3.41162500  | 9.30932500   | -3.40593600 |
| H | 1.55416800  | 8.29694000   | -3.05930000 |
| C | 5.41011500  | 8.03352000   | -2.98335600 |
| H | 5.12011300  | 6.03589200   | -2.26172100 |
| C | 4.80316200  | 9.22129000   | -3.38980700 |
| H | 2.92860400  | 10.22520400  | -3.72761700 |
| H | 6.49134000  | 7.95611600   | -2.95933000 |
| H | 5.40795800  | 10.06903700  | -3.69071800 |

# S17 Coordinates of the optimized geometries of molecule 3

S<sub>0</sub> geometry (Å) (B3LYP/6-311G(d,p))

|   |             |             |             |
|---|-------------|-------------|-------------|
| C | -1.52448200 | -4.34477700 | 0.79956800  |
| C | -2.16455700 | -3.14409600 | 0.51334100  |
| C | -1.50511700 | -1.91611500 | 0.66092600  |
| C | -0.17461800 | -1.94874600 | 1.11618200  |
| C | 0.47269600  | -3.15479600 | 1.36020000  |
| C | -0.18896300 | -4.38286100 | 1.21809600  |
| C | -0.07244600 | 0.63039700  | 0.29035800  |
| C | -1.41185500 | 0.43517500  | -0.09214400 |
| C | -1.98472500 | 1.39319000  | -0.93988900 |
| H | -3.01285300 | 1.28462200  | -1.25421400 |
| C | -1.25398400 | 2.48792500  | -1.38796100 |
| C | 0.66507100  | 1.70431200  | -0.19533200 |
| H | -2.07270800 | -5.26851100 | 0.65795000  |
| H | -3.18933900 | -3.16463100 | 0.17128300  |
| H | 1.49743200  | -3.13066600 | 1.71213400  |
| H | -1.73758800 | 3.19483900  | -2.05152600 |
| H | 1.69323500  | 1.81513800  | 0.12885300  |
| N | -2.14386100 | -0.68412100 | 0.37552400  |
| C | 0.50288700  | -5.66472000 | 1.50191400  |
| C | -0.18191800 | -6.73974900 | 2.09130300  |
| C | 1.86047900  | -5.83890400 | 1.18802700  |
| C | 0.46603300  | -7.94381300 | 2.35468100  |
| H | -1.22427200 | -6.62550000 | 2.36589600  |
| C | 2.50907000  | -7.04194900 | 1.45448500  |
| H | 2.40802600  | -5.03415100 | 0.71086300  |
| C | 1.81501300  | -8.10093600 | 2.03852400  |
| H | -0.08227900 | -8.75741700 | 2.81632200  |
| H | 3.55629100  | -7.15457400 | 1.19693400  |
| C | 0.08994600  | 2.66610900  | -1.03813600 |
| C | -3.58039200 | -0.66253900 | 0.26421800  |
| C | -4.34746600 | -0.26569700 | 1.40128500  |
| C | -4.20156600 | -1.01612500 | -0.91225500 |
| C | -5.77557600 | -0.24543500 | 1.28397600  |
| C | -3.75709700 | 0.10799500  | 2.63757200  |
| C | -5.61023900 | -0.99411100 | -1.01968700 |
| H | -3.60028900 | -1.31403200 | -1.76324900 |
| C | -6.37870900 | -0.61721900 | 0.05416500  |
| C | -6.55159000 | 0.14794200  | 2.40686000  |
| C | -4.53996300 | 0.48306000  | 3.70334000  |
| H | -2.67851300 | 0.09318000  | 2.72894300  |
| H | -6.07635000 | -1.27693600 | -1.95598800 |
| H | -7.46032600 | -0.59884200 | -0.02374300 |
| C | -5.94999700 | 0.50408500  | 3.58925900  |
| H | -7.63207300 | 0.16197900  | 2.31287100  |
| H | -4.07525200 | 0.76583400  | 4.64098700  |
| H | -6.55279000 | 0.80248700  | 4.43922100  |
| C | 0.87739700  | 3.82246000  | -1.53326400 |
| C | 0.28357500  | 5.08514600  | -1.69129800 |
| C | 2.23669100  | 3.68655400  | -1.85845900 |
| C | 1.02062100  | 6.17003900  | -2.15888500 |
| H | -0.75792900 | 5.22460100  | -1.42536600 |



|   |            |             |             |
|---|------------|-------------|-------------|
| C | 2.97443100 | 4.77239500  | -2.32287100 |
| H | 2.71538200 | 2.71811200  | -1.76868700 |
| C | 2.37007300 | 6.01957800  | -2.47626000 |
| H | 0.54152700 | 7.13679600  | -2.26641300 |
| H | 4.02110000 | 4.64102000  | -2.57371300 |
| S | 0.65619500 | -0.42541000 | 1.52972200  |
| H | 2.31956600 | -9.03783400 | 2.24495700  |
| H | 2.94408900 | 6.86457200  | -2.83882500 |

S<sub>CT-Naph</sub> geometry (Å) (B3LYP/6-311G(d,p))

|   |             |             |             |
|---|-------------|-------------|-------------|
| C | -1.60446300 | -4.28781900 | 1.17486200  |
| C | -2.16275900 | -3.09725500 | 0.77215300  |
| C | -1.35875000 | -1.98524000 | 0.43123700  |
| C | 0.04729200  | -2.15453800 | 0.52121200  |
| C | 0.59797000  | -3.37231200 | 0.93037500  |
| C | -0.20403800 | -4.45961100 | 1.26347700  |
| C | 0.15004600  | 0.44184600  | -0.30752400 |
| C | -1.26620200 | 0.35386500  | -0.31374300 |
| C | -1.97993700 | 1.51303900  | -0.69599000 |
| H | -3.05744900 | 1.46735100  | -0.71911800 |
| C | -1.32806600 | 2.67238200  | -1.04567000 |
| C | 0.79636000  | 1.62757700  | -0.66766300 |
| H | -2.26114200 | -5.11673800 | 1.40546800  |
| H | -3.23433800 | -2.99662600 | 0.69965600  |
| H | 1.67538500  | -3.45219900 | 1.00802500  |
| H | -1.91823700 | 3.52655700  | -1.35148500 |
| H | 1.87829200  | 1.65807300  | -0.62708400 |
| N | -1.96361300 | -0.79871900 | 0.03083000  |
| C | 0.38596900  | -5.74750500 | 1.69309200  |
| C | -0.25134300 | -6.53825400 | 2.66295700  |
| C | 1.59386800  | -6.20740500 | 1.14384700  |
| C | 0.30489600  | -7.74582300 | 3.07374100  |
| H | -1.17328600 | -6.19592300 | 3.11787900  |
| C | 2.14573700  | -7.41756500 | 1.55234800  |
| H | 2.09100200  | -5.62929500 | 0.37373800  |
| C | 1.50460300  | -8.19079100 | 2.51977500  |
| H | -0.19676000 | -8.33671900 | 3.83132700  |
| H | 3.07351200  | -7.76048300 | 1.10914700  |
| C | 0.08292000  | 2.76152900  | -1.04419800 |
| C | -3.41822100 | -0.75970500 | -0.02823000 |
| C | -4.13918500 | -0.36370700 | 1.13376800  |
| C | -4.04467500 | -1.11940800 | -1.24489600 |
| C | -5.58552700 | -0.33987900 | 1.02841600  |
| C | -3.53874000 | 0.00051100  | 2.36192900  |
| C | -5.42781500 | -1.08751100 | -1.31856800 |
| H | -3.44020600 | -1.41227600 | -2.09507300 |
| C | -6.19496400 | -0.70561900 | -0.20643600 |
| C | -6.33041400 | 0.04883700  | 2.16671100  |
| C | -4.31967200 | 0.38070100  | 3.46987100  |
| H | -2.45927700 | -0.01229100 | 2.45544200  |
| H | -5.92093100 | -1.36079300 | -2.24562800 |
| H | -7.27735700 | -0.68396300 | -0.27530100 |
| C | -5.70443100 | 0.40417800  | 3.37182500  |
| H | -7.41335100 | 0.06777400  | 2.09229700  |

|   |             |             |             |
|---|-------------|-------------|-------------|
| H | -3.83130100 | 0.65463700  | 4.39905200  |
| H | -6.30741200 | 0.69712500  | 4.22522400  |
| C | 0.77381200  | 4.01243500  | -1.43066100 |
| C | 0.21494600  | 5.26356700  | -1.12307500 |
| C | 2.00135000  | 3.97834000  | -2.11210000 |
| C | 0.86565900  | 6.44058100  | -1.48024300 |
| H | -0.72070900 | 5.31814000  | -0.57940400 |
| C | 2.64795700  | 5.15634800  | -2.47258300 |
| H | 2.44038000  | 3.02615800  | -2.38574800 |
| C | 2.08373100  | 6.39202700  | -2.15707500 |
| H | 0.42302900  | 7.39635700  | -1.22466500 |
| H | 3.58957800  | 5.10896900  | -3.00725100 |
| S | 1.18742100  | -0.88492900 | 0.15192500  |
| H | 1.93564200  | -9.13286300 | 2.83811700  |
| H | 2.58836000  | 7.30918900  | -2.43773200 |

S<sub>CT-Phen</sub> geometry (Å) (B3LYP/6-311G(d,p))

|   |             |             |             |
|---|-------------|-------------|-------------|
| C | -1.60451100 | -4.28756000 | 1.17522800  |
| C | -2.16274500 | -3.09693900 | 0.77259200  |
| C | -1.35868700 | -1.98498700 | 0.43169300  |
| C | 0.04730900  | -2.15429000 | 0.52167400  |
| C | 0.59795200  | -3.37217900 | 0.93063800  |
| C | -0.20408700 | -4.45945500 | 1.26371300  |
| C | 0.15012600  | 0.44207300  | -0.30703100 |
| C | -1.26611900 | 0.35408200  | -0.31343600 |
| C | -1.97976400 | 1.51321400  | -0.69600300 |
| H | -3.05727200 | 1.46753400  | -0.71935700 |
| C | -1.32784200 | 2.67251700  | -1.04571300 |
| C | 0.79650100  | 1.62775000  | -0.66732300 |
| H | -2.26126100 | -5.11641900 | 1.40585300  |
| H | -3.23432900 | -2.99621300 | 0.70014400  |
| H | 1.67537600  | -3.45215500 | 1.00812900  |
| H | -1.91799200 | 3.52664000  | -1.35172900 |
| H | 1.87844400  | 1.65817800  | -0.62677300 |
| N | -1.96353300 | -0.79848300 | 0.03119500  |
| C | 0.38589000  | -5.74743600 | 1.69311700  |
| C | -0.25135000 | -6.53822300 | 2.66300300  |
| C | 1.59369800  | -6.20734500 | 1.14370900  |
| C | 0.30486100  | -7.74586100 | 3.07361600  |
| H | -1.17321600 | -6.19586100 | 3.11806200  |
| C | 2.14555600  | -7.41756800 | 1.55205700  |
| H | 2.09079200  | -5.62919100 | 0.37360300  |
| C | 1.50448600  | -8.19084700 | 2.51947600  |
| H | -0.19674300 | -8.33680300 | 3.83120100  |
| H | 3.07327700  | -7.76047800 | 1.10873300  |
| C | 0.08314600  | 2.76168200  | -1.04403800 |
| C | -3.41816000 | -0.75973300 | -0.02816800 |
| C | -4.13941800 | -0.36385600 | 1.13365700  |
| C | -4.04423400 | -1.11959800 | -1.24493700 |
| C | -5.58578700 | -0.34026900 | 1.02792800  |
| C | -3.53934200 | 0.00049600  | 2.36191900  |
| C | -5.42735800 | -1.08793500 | -1.31899700 |
| H | -3.43941700 | -1.41242400 | -2.09488500 |

|   |             |             |             |
|---|-------------|-------------|-------------|
| C | -6.19481600 | -0.70611100 | -0.20703200 |
| C | -6.33099000 | 0.04834700  | 2.16605900  |
| C | -4.32060200 | 0.38058800  | 3.46968600  |
| H | -2.45989700 | -0.01209500 | 2.45570800  |
| H | -5.92026500 | -1.36131600 | -2.24613100 |
| H | -7.27719600 | -0.68462000 | -0.27621100 |
| C | -5.70533900 | 0.40381300  | 3.37129600  |
| H | -7.41391400 | 0.06711600  | 2.09142900  |
| H | -3.83244200 | 0.65462700  | 4.39894300  |
| H | -6.30861500 | 0.69666900  | 4.22452100  |
| C | 0.77409100  | 4.01252900  | -1.43054400 |
| C | 0.21524100  | 5.26368800  | -1.12302600 |
| C | 2.00167900  | 3.97838200  | -2.11187300 |
| C | 0.86600700  | 6.44067700  | -1.48018300 |
| H | -0.72044600 | 5.31828800  | -0.57940900 |
| C | 2.64834500  | 5.15636600  | -2.47234200 |
| H | 2.44072900  | 3.02617300  | -2.38541400 |
| C | 2.08413200  | 6.39207200  | -2.15692100 |
| H | 0.42337500  | 7.39646900  | -1.22466500 |
| H | 3.59001600  | 5.10892900  | -3.00691800 |
| S | 1.18748500  | -0.88456000 | 0.15291000  |
| H | 1.93550900  | -9.13296500 | 2.83770300  |
| H | 2.58881100  | 7.30921000  | -2.43756100 |

T<sub>CT-Phen</sub> geometry (Å) (B3LYP/6-311G(d,p))

|   |             |             |             |
|---|-------------|-------------|-------------|
| C | -1.62909600 | -4.29615400 | 1.25990800  |
| C | -2.19002100 | -3.10405200 | 0.90321300  |
| C | -1.40260300 | -1.97141400 | 0.54841700  |
| C | 0.03912100  | -2.13907200 | 0.63762500  |
| C | 0.59157100  | -3.36046200 | 0.98445700  |
| C | -0.18506600 | -4.49353700 | 1.28798500  |
| C | 0.12253200  | 0.46795900  | -0.18910500 |
| C | -1.30434800 | 0.36619700  | -0.25204100 |
| C | -2.00351100 | 1.51180400  | -0.71785100 |
| H | -3.08075900 | 1.47925100  | -0.79031600 |
| C | -1.34745900 | 2.65504400  | -1.09684200 |
| C | 0.76971700  | 1.64093500  | -0.58513800 |
| H | -2.28981400 | -5.11939800 | 1.49258500  |
| H | -3.26750700 | -3.02402200 | 0.87508200  |
| H | 1.67153500  | -3.41683700 | 1.05362000  |
| H | -1.93384200 | 3.48490700  | -1.46981500 |
| H | 1.84966100  | 1.67703600  | -0.49726900 |
| N | -1.98392400 | -0.78322400 | 0.12414200  |
| C | 0.41041300  | -5.77315100 | 1.62707100  |
| C | -0.34644300 | -6.80465000 | 2.24516400  |
| C | 1.77632300  | -6.06386300 | 1.36193400  |
| C | 0.22558000  | -8.02443200 | 2.58160900  |
| H | -1.38741000 | -6.63867000 | 2.49074900  |
| C | 2.33897800  | -7.28413800 | 1.69972300  |
| H | 2.39595000  | -5.33193300 | 0.85851800  |
| C | 1.57253800  | -8.28183400 | 2.31537100  |
| H | -0.38540100 | -8.78187500 | 3.06135500  |
| H | 3.38370500  | -7.46813200 | 1.47232700  |

|   |             |             |             |
|---|-------------|-------------|-------------|
| C | 0.07670600  | 2.75634200  | -1.05156000 |
| C | -3.43527600 | -0.74665600 | 0.06171600  |
| C | -4.17044500 | -0.30216100 | 1.19678100  |
| C | -4.06060100 | -1.14528400 | -1.09354000 |
| C | -5.59948100 | -0.27826800 | 1.09535000  |
| C | -3.55887900 | 0.11217000  | 2.40928500  |
| C | -5.47013400 | -1.11778900 | -1.18155100 |
| H | -3.46601400 | -1.47867700 | -1.93545300 |
| C | -6.21997400 | -0.69352400 | -0.11173700 |
| C | -6.35759500 | 0.16220500  | 2.21301700  |
| C | -4.32603900 | 0.53136100  | 3.46980000  |
| H | -2.47966500 | 0.09479200  | 2.49428800  |
| H | -5.95088900 | -1.43340100 | -2.09941000 |
| H | -7.30226300 | -0.67066500 | -0.17567900 |
| C | -5.73744300 | 0.55789300  | 3.37264200  |
| H | -7.43893900 | 0.17976000  | 2.13294100  |
| H | -3.84745200 | 0.84477400  | 4.39030600  |
| H | -6.32646800 | 0.89179700  | 4.21884600  |
| C | 0.77712400  | 3.98250100  | -1.47298600 |
| C | 0.15788500  | 5.24412500  | -1.37172900 |
| C | 2.08745800  | 3.93999300  | -1.98978700 |
| C | 0.81943200  | 6.40441500  | -1.76107200 |
| H | -0.84079900 | 5.32194500  | -0.95885600 |
| C | 2.74722600  | 5.10117200  | -2.37635600 |
| H | 2.58489400  | 2.98558100  | -2.11622300 |
| C | 2.11864800  | 6.34266200  | -2.26526100 |
| H | 0.32009000  | 7.36204700  | -1.66283100 |
| H | 3.75256300  | 5.03573200  | -2.77763300 |
| S | 1.13342000  | -0.79343900 | 0.47158000  |
| H | 2.01500900  | -9.23627100 | 2.57519600  |
| H | 2.63262300  | 7.24691200  | -2.56998600 |

T<sub>CT-Naph</sub> geometry (Å) (B3LYP/6-311G(d,p))

|   |             |             |             |
|---|-------------|-------------|-------------|
| C | -1.60612300 | -4.29919100 | 1.13980200  |
| C | -2.16425000 | -3.10916300 | 0.73499300  |
| C | -1.36091500 | -1.99004500 | 0.41686400  |
| C | 0.04427700  | -2.15181300 | 0.52993200  |
| C | 0.59476700  | -3.36839500 | 0.94311800  |
| C | -0.20660600 | -4.46242000 | 1.25493900  |
| C | 0.14711900  | 0.44456300  | -0.29817100 |
| C | -1.26835400 | 0.34946500  | -0.32755000 |
| C | -1.98138600 | 1.50139500  | -0.73192000 |
| H | -3.05807400 | 1.44945400  | -0.77360300 |
| C | -1.32957100 | 2.66165300  | -1.07897600 |
| C | 0.79338400  | 1.63167900  | -0.65425300 |
| H | -2.26169000 | -5.13410500 | 1.35116800  |
| H | -3.23493900 | -3.01412000 | 0.64380800  |
| H | 1.67097100  | -3.44206700 | 1.04104500  |
| H | -1.91849200 | 3.50981600  | -1.40342600 |
| H | 1.87420400  | 1.66880300  | -0.59405100 |
| N | -1.96633200 | -0.80201100 | 0.02096500  |
| C | 0.38334200  | -5.74880200 | 1.68924900  |
| C | -0.26726300 | -6.54833600 | 2.64292100  |

|   |             |             |             |
|---|-------------|-------------|-------------|
| C | 1.60427400  | -6.19843300 | 1.16075700  |
| C | 0.28868200  | -7.75449100 | 3.05828300  |
| H | -1.19979800 | -6.21397000 | 3.08189600  |
| C | 2.15589100  | -7.40719600 | 1.57371700  |
| H | 2.11231400  | -5.61340300 | 0.40308600  |
| C | 1.50142600  | -8.18923200 | 2.52500800  |
| H | -0.22351200 | -8.35227100 | 3.80331500  |
| H | 3.09404000  | -7.74211700 | 1.14652300  |
| C | 0.08056800  | 2.75895900  | -1.05127600 |
| C | -3.42008700 | -0.75980400 | -0.02669700 |
| C | -4.13199200 | -0.36100400 | 1.13998500  |
| C | -4.05664300 | -1.12050000 | -1.23863000 |
| C | -5.57897200 | -0.33414700 | 1.04526100  |
| C | -3.52303700 | 0.00337800  | 2.36412500  |
| C | -5.44070200 | -1.08540500 | -1.30151800 |
| H | -3.45920100 | -1.41595100 | -2.09279700 |
| C | -6.19868000 | -0.70042800 | -0.18544400 |
| C | -6.31502300 | 0.05717200  | 2.18742200  |
| C | -4.29546800 | 0.38633800  | 3.47638500  |
| H | -2.44300900 | -0.01172100 | 2.45092300  |
| H | -5.94139700 | -1.35898000 | -2.22450500 |
| H | -7.28146800 | -0.67651400 | -0.24645000 |
| C | -5.68083400 | 0.41286000  | 3.38835500  |
| H | -7.39843300 | 0.07799800  | 2.12012300  |
| H | -3.79984000 | 0.66025000  | 4.40177500  |
| H | -6.27749300 | 0.70805600  | 4.24533700  |
| C | 0.77136900  | 4.01143400  | -1.43292100 |
| C | 0.20105100  | 5.26105700  | -1.14074200 |
| C | 2.00977800  | 3.98031000  | -2.09445900 |
| C | 0.85126300  | 6.43971600  | -1.49344100 |
| H | -0.74351700 | 5.31319200  | -0.61244700 |
| C | 2.65582500  | 5.15992600  | -2.45073200 |
| H | 2.45808000  | 3.02903100  | -2.35600500 |
| C | 2.08017800  | 6.39417700  | -2.15058200 |
| H | 0.39964900  | 7.39441600  | -1.24983000 |
| H | 3.60607800  | 5.11486600  | -2.97011200 |
| S | 1.18300400  | -0.87197400 | 0.19306700  |
| H | 1.93228800  | -9.13019000 | 2.84686500  |
| H | 2.58442100  | 7.31256700  | -2.42789800 |

T<sub>LE-Naph</sub> geometry (Å) (B3LYP/6-311G(d,p))

|   |             |             |             |
|---|-------------|-------------|-------------|
| C | -1.53789000 | -4.30618900 | 0.89231600  |
| C | -2.16222900 | -3.09231100 | 0.62821900  |
| C | -1.46692200 | -1.88010200 | 0.73509500  |
| C | -0.11708200 | -1.93893300 | 1.12406100  |
| C | 0.51141400  | -3.15881400 | 1.34803500  |
| C | -0.18526600 | -4.37176500 | 1.24796500  |
| C | -0.01097200 | 0.64111500  | 0.29152800  |
| C | -1.37139300 | 0.46964700  | -0.02035900 |
| C | -1.97796700 | 1.44510800  | -0.82352100 |
| H | -3.02448100 | 1.35554100  | -1.08040600 |
| C | -1.25774000 | 2.53420900  | -1.30135900 |
| C | 0.71239300  | 1.71165100  | -0.22208800 |
| H | -2.11309800 | -5.21788200 | 0.78407200  |

|   |             |             |             |
|---|-------------|-------------|-------------|
| H | -3.20301900 | -3.09061400 | 0.33482200  |
| H | 1.55219400  | -3.15746900 | 1.65028900  |
| H | -1.76684800 | 3.25527800  | -1.92958200 |
| H | 1.75782500  | 1.80699400  | 0.04714900  |
| N | -2.10006100 | -0.63956100 | 0.47488300  |
| C | 0.48916300  | -5.66753400 | 1.50998400  |
| C | -0.19018500 | -6.71927000 | 2.14584400  |
| C | 1.82394800  | -5.87851700 | 1.12831200  |
| C | 0.44099000  | -7.93648000 | 2.38875300  |
| H | -1.21379800 | -6.57627500 | 2.47258400  |
| C | 2.45590000  | -7.09474500 | 1.37413500  |
| H | 2.36543300  | -5.09235900 | 0.61463900  |
| C | 1.76743900  | -8.13031800 | 2.00491600  |
| H | -0.10225300 | -8.73157000 | 2.88718500  |
| H | 3.48524800  | -7.23599600 | 1.06399200  |
| C | 0.10566800  | 2.68949500  | -1.02361000 |
| C | -3.52623100 | -0.63335600 | 0.31933300  |
| C | -4.34655000 | -0.27438700 | 1.42480900  |
| C | -4.11075300 | -1.00202500 | -0.96428600 |
| C | -5.77938000 | -0.28269800 | 1.24465200  |
| C | -3.82069000 | 0.08832500  | 2.67995800  |
| C | -5.46210500 | -1.00534100 | -1.11762500 |
| H | -3.44686500 | -1.27083900 | -1.77678700 |
| C | -6.31803600 | -0.64453600 | -0.01500700 |
| C | -6.59749000 | 0.07251900  | 2.33469700  |
| C | -4.68226400 | 0.44630900  | 3.77695500  |
| H | -2.74755200 | 0.09819600  | 2.81929700  |
| H | -5.90863600 | -1.27889400 | -2.06626600 |
| H | -7.39332600 | -0.64947500 | -0.14828900 |
| C | -6.03653900 | 0.43882000  | 3.60888600  |
| H | -7.67409700 | 0.06889800  | 2.20748600  |
| H | -4.23875200 | 0.71861700  | 4.72713900  |
| H | -6.70120600 | 0.70516500  | 4.42210800  |
| C | 0.88187000  | 3.83955900  | -1.55015300 |
| C | 0.30005100  | 5.11276400  | -1.66122200 |
| C | 2.21827800  | 3.68659400  | -1.95330600 |
| C | 1.02651600  | 6.19145200  | -2.15876300 |
| H | -0.72245700 | 5.26496100  | -1.33526700 |
| C | 2.94555100  | 4.76614500  | -2.44789400 |
| H | 2.68589900  | 2.71001800  | -1.90062900 |
| C | 2.35324000  | 6.02398100  | -2.55395200 |
| H | 0.55746400  | 7.16653000  | -2.22899200 |
| H | 3.97410200  | 4.62167000  | -2.75920500 |
| S | 0.77062900  | -0.43363400 | 1.48168900  |
| H | 2.25900900  | -9.07746700 | 2.19531600  |
| H | 2.91905500  | 6.86412000  | -2.93995700 |

## S18 Coordinates of the optimized geometries of molecule 4

S<sub>0</sub> geometry (Å) (B3LYP/6-311G(d,p))

|   |             |             |            |
|---|-------------|-------------|------------|
| C | -1.52356100 | -4.34570800 | 0.79020500 |
| C | -2.16501700 | -3.14611400 | 0.50232300 |
| C | -1.50953300 | -1.91711100 | 0.65648500 |

|   |             |             |             |
|---|-------------|-------------|-------------|
| C | -0.18184100 | -1.94670100 | 1.11938100  |
| C | 0.46710000  | -3.15151600 | 1.36546000  |
| C | -0.19062400 | -4.38089300 | 1.21706700  |
| C | -0.07948600 | 0.63190900  | 0.29320900  |
| C | -1.41611900 | 0.43467800  | -0.09707500 |
| C | -1.98501700 | 1.38931700  | -0.95083900 |
| H | -3.01117100 | 1.27950300  | -1.27113400 |
| C | -1.25273900 | 2.48372700  | -1.39731100 |
| C | 0.65981200  | 1.70558700  | -0.19044400 |
| H | -2.06838600 | -5.27063100 | 0.64349500  |
| H | -3.18781300 | -3.16921600 | 0.15454400  |
| H | 1.48963900  | -3.12545200 | 1.72353500  |
| H | -1.73290900 | 3.18831200  | -2.06579100 |
| H | 1.68584300  | 1.81842300  | 0.13969500  |
| N | -2.14957500 | -0.68501700 | 0.36998700  |
| C | 0.50275100  | -5.66153300 | 1.50289700  |
| C | -0.18280200 | -6.73900800 | 2.08684600  |
| C | 1.86246100  | -5.83187300 | 1.19629100  |
| C | 0.46660300  | -7.94187600 | 2.35209700  |
| H | -1.22696200 | -6.62768400 | 2.35572000  |
| C | 2.51244900  | -7.03375600 | 1.46456400  |
| H | 2.41068600  | -5.02508600 | 0.72336300  |
| C | 1.81768900  | -8.09523700 | 2.04319600  |
| H | -0.08228100 | -8.75748800 | 2.80948000  |
| H | 3.56134200  | -7.14350800 | 1.21265600  |
| C | 0.08868500  | 2.66437500  | -1.03929800 |
| C | -3.58375200 | -0.66406700 | 0.25685900  |
| C | -4.35414500 | -0.26867300 | 1.39346900  |
| C | -4.20577500 | -1.01612900 | -0.91935700 |
| C | -5.78174100 | -0.24536400 | 1.28611300  |
| C | -3.76914800 | 0.10438300  | 2.63151200  |
| C | -5.61265300 | -0.99667700 | -1.03521600 |
| H | -3.60884700 | -1.31364600 | -1.77281400 |
| C | -6.35491600 | -0.61938200 | 0.04768300  |
| C | -6.56813700 | 0.14365200  | 2.40004900  |
| C | -4.55481000 | 0.47756100  | 3.69613500  |
| H | -2.69086100 | 0.09011900  | 2.72389600  |
| H | -6.10282500 | -1.27334400 | -1.95955300 |
| C | -5.96408900 | 0.49808500  | 3.58187500  |
| H | -7.64599900 | 0.15610500  | 2.30290000  |
| H | -4.09108700 | 0.75949700  | 4.63431900  |
| H | -6.56752000 | 0.79494200  | 4.43154400  |
| C | 0.87779700  | 3.82043500  | -1.53258000 |
| C | 0.28353900  | 5.08209300  | -1.69678500 |
| C | 2.23898800  | 3.68504600  | -1.84980800 |
| C | 1.02213900  | 6.16666300  | -2.16266300 |
| H | -0.75959100 | 5.22107800  | -1.43705900 |
| C | 2.97822500  | 4.77055700  | -2.31260300 |
| H | 2.71809900  | 2.71728100  | -1.75514000 |
| C | 2.37347300  | 6.01676900  | -2.47217000 |
| H | 0.54272200  | 7.13269800  | -2.27507200 |
| H | 4.02639600  | 4.63966700  | -2.55732500 |
| S | 0.64267800  | -0.42146800 | 1.53838300  |
| F | -7.70557300 | -0.59653900 | -0.05129300 |

|   |            |             |             |
|---|------------|-------------|-------------|
| H | 2.32334800 | -9.03122300 | 2.25105200  |
| H | 2.94867100 | 6.86150500  | -2.83346000 |

S<sub>CT-Naph</sub> geometry (Å) (B3LYP/6-311G(d,p))

|   |             |             |             |
|---|-------------|-------------|-------------|
| C | -1.60582700 | -4.28823300 | 1.17780100  |
| C | -2.16488600 | -3.09877900 | 0.77288700  |
| C | -1.36145500 | -1.98797400 | 0.42735400  |
| C | 0.04468100  | -2.15679800 | 0.51629400  |
| C | 0.59611400  | -3.37374500 | 0.92713900  |
| C | -0.20521900 | -4.46025500 | 1.26389900  |
| C | 0.14712600  | 0.43966200  | -0.31226700 |
| C | -1.26912100 | 0.35205300  | -0.31901400 |
| C | -1.98241200 | 1.51226300  | -0.69837300 |
| H | -3.05996100 | 1.46896500  | -0.72174000 |
| C | -1.33002600 | 2.67218600  | -1.04514300 |
| C | 0.79394500  | 1.62597500  | -0.66984900 |
| H | -2.26231700 | -5.11620800 | 1.41216300  |
| H | -3.23675500 | -2.99998900 | 0.70306200  |
| H | 1.67365700  | -3.45330200 | 1.00309700  |
| H | -1.92006600 | 3.52731700  | -1.34843000 |
| H | 1.87588100  | 1.65572700  | -0.62935300 |
| N | -1.96562500 | -0.80233500 | 0.02241800  |
| C | 0.38523300  | -5.74744800 | 1.69472500  |
| C | -0.25065800 | -6.53649600 | 2.66691000  |
| C | 1.59217500  | -6.20832700 | 1.14419100  |
| C | 0.30609300  | -7.74346800 | 3.07868900  |
| H | -1.17177500 | -6.19333100 | 3.12286900  |
| C | 2.14448500  | -7.41792700 | 1.55367200  |
| H | 2.08810800  | -5.63154700 | 0.37231500  |
| C | 1.50479400  | -8.18949000 | 2.52338800  |
| H | -0.19437900 | -8.33308400 | 3.83804000  |
| H | 3.07144000  | -7.76173100 | 1.10946300  |
| C | 0.08104500  | 2.76099200  | -1.04366400 |
| C | -3.41930700 | -0.76482800 | -0.03982800 |
| C | -4.14097400 | -0.36479100 | 1.12241600  |
| C | -4.04166900 | -1.12902600 | -1.25314600 |
| C | -5.58643000 | -0.33980100 | 1.02497500  |
| C | -3.54663300 | 0.00467100  | 2.34964800  |
| C | -5.42534400 | -1.10150400 | -1.33472500 |
| H | -3.44011600 | -1.42449500 | -2.10343600 |
| C | -6.15441500 | -0.71398000 | -0.21206900 |
| C | -6.34917400 | 0.05028900  | 2.15071200  |
| C | -4.33614800 | 0.38858000  | 3.45492600  |
| H | -2.46806400 | -0.00620200 | 2.44672200  |
| H | -5.94596300 | -1.37251000 | -2.24472700 |
| C | -5.71859100 | 0.41028800  | 3.35423900  |
| H | -7.42830700 | 0.06649600  | 2.06980500  |
| H | -3.85094400 | 0.66667900  | 4.38421600  |
| H | -6.32252000 | 0.70610800  | 4.20571000  |
| C | 0.77216600  | 4.01260400  | -1.42711800 |
| C | 0.21325900  | 5.26310000  | -1.11701100 |
| C | 2.00010200  | 3.97976000  | -2.10790700 |
| C | 0.86439400  | 6.44078400  | -1.47112700 |



|   |             |             |             |
|---|-------------|-------------|-------------|
| H | -0.72266700 | 5.31666800  | -0.57371600 |
| C | 2.64706300  | 5.15845900  | -2.46538700 |
| H | 2.43916900  | 3.02813400  | -2.38341800 |
| C | 2.08283400  | 6.39350800  | -2.14738700 |
| H | 0.42180800  | 7.39605400  | -1.21362400 |
| H | 3.58897200  | 5.11214600  | -2.99962600 |
| S | 1.18428000  | -0.88851600 | 0.14236800  |
| F | -7.53121000 | -0.69136600 | -0.30733100 |
| H | 1.93618300  | -9.13114400 | 2.84247500  |
| H | 2.58778000  | 7.31121000  | -2.42567800 |

S<sub>CT-Phen</sub> geometry (Å) (B3LYP/6-311G(d,p))

|   |             |             |             |
|---|-------------|-------------|-------------|
| C | -1.60591300 | -4.28826100 | 1.17799500  |
| C | -2.16498600 | -3.09869500 | 0.77342300  |
| C | -1.36157100 | -1.98792100 | 0.42778600  |
| C | 0.04456200  | -2.15687200 | 0.51628100  |
| C | 0.59601700  | -3.37396500 | 0.92670000  |
| C | -0.20529800 | -4.46045000 | 1.26356800  |
| C | 0.14701600  | 0.43956700  | -0.31229300 |
| C | -1.26922900 | 0.35207100  | -0.31871000 |
| C | -1.98250800 | 1.51228300  | -0.69805900 |
| H | -3.06006900 | 1.46905500  | -0.72121100 |
| C | -1.33011500 | 2.67212700  | -1.04508100 |
| C | 0.79384800  | 1.62578800  | -0.67018900 |
| H | -2.26244400 | -5.11617700 | 1.41245800  |
| H | -3.23687000 | -2.99980200 | 0.70393600  |
| H | 1.67358500  | -3.45364200 | 1.00220700  |
| H | -1.92018700 | 3.52725500  | -1.34831900 |
| H | 1.87580300  | 1.65541700  | -0.63001700 |
| N | -1.96575700 | -0.80221000 | 0.02301800  |
| C | 0.38518000  | -5.74778600 | 1.69391600  |
| C | -0.25048000 | -6.53701600 | 2.66610100  |
| C | 1.59191600  | -6.20863600 | 1.14291500  |
| C | 0.30629400  | -7.74413400 | 3.07742800  |
| H | -1.17143300 | -6.19390700 | 3.12243100  |
| C | 2.14425600  | -7.41837500 | 1.55194700  |
| H | 2.08767800  | -5.63173700 | 0.37101700  |
| C | 1.50479500  | -8.19012300 | 2.52166900  |
| H | -0.19401500 | -8.33388600 | 3.83678000  |
| H | 3.07105600  | -7.76213300 | 1.10737800  |
| C | 0.08096200  | 2.76083300  | -1.04393100 |
| C | -3.41944300 | -0.76454800 | -0.03885700 |
| C | -4.14077400 | -0.36427900 | 1.12353200  |
| C | -4.04215900 | -1.12881300 | -1.25195400 |
| C | -5.58627300 | -0.33914900 | 1.02640100  |
| C | -3.54610300 | 0.00525900  | 2.35053700  |
| C | -5.42583300 | -1.10116600 | -1.33323800 |
| H | -3.44079000 | -1.42446000 | -2.10231800 |
| C | -6.15458400 | -0.71340100 | -0.21041100 |
| C | -6.34869300 | 0.05117600  | 2.15231600  |
| C | -4.33529800 | 0.38941000  | 3.45599200  |
| H | -2.46751100 | -0.00571400 | 2.44736300  |
| H | -5.94673300 | -1.37222700 | -2.24305800 |

|   |             |             |             |
|---|-------------|-------------|-------------|
| C | -5.71776100 | 0.41124800  | 3.35561100  |
| H | -7.42784400 | 0.06750100  | 2.07169400  |
| H | -3.84981300 | 0.66757100  | 4.38511200  |
| H | -6.32146900 | 0.70724200  | 4.20718400  |
| C | 0.77208300  | 4.01235400  | -1.42764700 |
| C | 0.21335300  | 5.26290700  | -1.11746300 |
| C | 1.99982600  | 3.97938900  | -2.10877100 |
| C | 0.86447900  | 6.44052900  | -1.47181300 |
| H | -0.72242100 | 5.31658700  | -0.57391600 |
| C | 2.64677600  | 5.15802200  | -2.46649300 |
| H | 2.43876200  | 3.02772500  | -2.38436600 |
| C | 2.08273300  | 6.39313300  | -2.14839900 |
| H | 0.42201400  | 7.39583600  | -1.21423700 |
| H | 3.58853500  | 5.11159600  | -3.00098500 |
| S | 1.18418400  | -0.88859000 | 0.14239300  |
| F | -7.53139000 | -0.69065400 | -0.30538000 |
| H | 1.93620700  | -9.13188500 | 2.84040600  |
| H | 2.58767400  | 7.31078000  | -2.42688000 |

T<sub>CT-Phen</sub> geometry (Å) (B3LYP/6-311G(d,p))

|   |             |             |             |
|---|-------------|-------------|-------------|
| C | -1.63057600 | -4.30987700 | 1.17523700  |
| C | -2.19309600 | -3.11731900 | 0.80373400  |
| C | -1.40480300 | -1.97545200 | 0.49350700  |
| C | 0.02811600  | -2.13147100 | 0.61564900  |
| C | 0.57975100  | -3.35389400 | 0.98427700  |
| C | -0.19986900 | -4.48278200 | 1.26541700  |
| C | 0.13044900  | 0.47656400  | -0.21822900 |
| C | -1.31179400 | 0.38192200  | -0.25988400 |
| C | -2.00931100 | 1.54495800  | -0.68629200 |
| H | -3.08866200 | 1.52539000  | -0.73160900 |
| C | -1.35444200 | 2.68828200  | -1.06204400 |
| C | 0.77646500  | 1.64329000  | -0.61468400 |
| H | -2.28733600 | -5.14751300 | 1.36773400  |
| H | -3.26903100 | -3.05079600 | 0.73026500  |
| H | 1.65770900  | -3.40868500 | 1.08295400  |
| H | -1.94492800 | 3.52707000  | -1.40542100 |
| H | 1.85769600  | 1.66795700  | -0.54266500 |
| N | -1.98816200 | -0.77858100 | 0.09582200  |
| C | 0.39916400  | -5.76416000 | 1.64085600  |
| C | -0.33911400 | -6.73941700 | 2.35139700  |
| C | 1.73781900  | -6.08486900 | 1.31315800  |
| C | 0.23081700  | -7.95268000 | 2.71912800  |
| H | -1.36113600 | -6.53432100 | 2.64467900  |
| C | 2.30239700  | -7.29800100 | 1.68243900  |
| H | 2.33358400  | -5.38709200 | 0.73713100  |
| C | 1.55556600  | -8.24493600 | 2.38996900  |
| H | -0.36195700 | -8.67316300 | 3.27226500  |
| H | 3.32906900  | -7.51354900 | 1.40705800  |
| C | 0.08582400  | 2.77776700  | -1.05721700 |
| C | -3.43679400 | -0.73934400 | 0.03937100  |
| C | -4.17148700 | -0.34081000 | 1.19309300  |
| C | -4.06915100 | -1.08756900 | -1.12817600 |
| C | -5.60023600 | -0.31006000 | 1.10914300  |

|   |             |             |             |
|---|-------------|-------------|-------------|
| C | -3.56024100 | 0.02696600  | 2.41975600  |
| C | -5.47733400 | -1.05971200 | -1.21780700 |
| H | -3.48242700 | -1.38613300 | -1.98785600 |
| C | -6.19694600 | -0.67932200 | -0.12009600 |
| C | -6.36407400 | 0.08190500  | 2.23771300  |
| C | -4.32540700 | 0.40288200  | 3.49803200  |
| H | -2.48088000 | 0.00885000  | 2.49920800  |
| H | -5.98569500 | -1.33225400 | -2.13324400 |
| C | -5.73656300 | 0.43115000  | 3.40846500  |
| H | -7.44330900 | 0.10055200  | 2.15994900  |
| H | -3.84367100 | 0.68103000  | 4.42801000  |
| H | -6.32262100 | 0.73020900  | 4.26928200  |
| C | 0.78387700  | 3.99264800  | -1.48224500 |
| C | 0.13901500  | 5.25116600  | -1.47188800 |
| C | 2.12863800  | 3.96295700  | -1.92004800 |
| C | 0.80304700  | 6.40750200  | -1.86466800 |
| H | -0.88378900 | 5.33034600  | -1.12501200 |
| C | 2.78755100  | 5.12041900  | -2.31170500 |
| H | 2.65423400  | 3.01764900  | -1.98189600 |
| C | 2.13225700  | 6.35513900  | -2.28770400 |
| H | 0.28069100  | 7.35757500  | -1.83451700 |
| H | 3.81623700  | 5.05940400  | -2.64995000 |
| S | 1.13152800  | -0.79156500 | 0.44019900  |
| F | -7.54758200 | -0.64851500 | -0.19411300 |
| H | 1.99735500  | -9.19273000 | 2.67453000  |
| H | 2.64739600  | 7.25707200  | -2.59695700 |

T<sub>CT-Naph</sub> geometry (Å) (B3LYP/6-311G(d,p))

|   |             |             |             |
|---|-------------|-------------|-------------|
| C | -1.53626000 | -4.29208300 | 0.87065700  |
| C | -2.16115100 | -3.07852600 | 0.60645200  |
| C | -1.46954100 | -1.86570700 | 0.72538000  |
| C | -0.12220500 | -1.92231500 | 1.12153100  |
| C | 0.50730000  | -3.14177000 | 1.34548200  |
| C | -0.18636400 | -4.35558900 | 1.23679400  |
| C | -0.01720800 | 0.65800000  | 0.28971600  |
| C | -1.37684300 | 0.48764100  | -0.02581000 |
| C | -1.98301400 | 1.46655900  | -0.82454900 |
| H | -3.03017200 | 1.38220900  | -1.08039500 |
| C | -1.26150900 | 2.55644400  | -1.29902200 |
| C | 0.70704000  | 1.72972800  | -0.22013700 |
| H | -2.10823500 | -5.20467400 | 0.75371500  |
| H | -3.19938600 | -3.07903900 | 0.30394200  |
| H | 1.54633800  | -3.13946500 | 1.65355800  |
| H | -1.77014500 | 3.28033600  | -1.92428900 |
| H | 1.75192600  | 1.82449500  | 0.05128800  |
| N | -2.10454900 | -0.62425500 | 0.46696100  |
| C | 0.48882300  | -5.65091800 | 1.49937100  |
| C | -0.19294300 | -6.70555900 | 2.12765600  |
| C | 1.82643500  | -5.85817900 | 1.12585800  |
| C | 0.43888300  | -7.92227100 | 2.37133600  |
| H | -1.21898100 | -6.56533300 | 2.44791600  |
| C | 2.45893300  | -7.07398400 | 1.37231900  |
| H | 2.36984500  | -5.06954400 | 0.61805900  |

|   |             |             |             |
|---|-------------|-------------|-------------|
| C | 1.76817400  | -8.11252000 | 1.99565900  |
| H | -0.10613400 | -8.71977800 | 2.86390400  |
| H | 3.49053300  | -7.21254100 | 1.06855400  |
| C | 0.10177600  | 2.70951400  | -1.02035600 |
| C | -3.52829800 | -0.62369300 | 0.30816100  |
| C | -4.35260500 | -0.31019500 | 1.42560100  |
| C | -4.10430700 | -0.96322000 | -0.98835100 |
| C | -5.78567300 | -0.33229300 | 1.25715700  |
| C | -3.83227000 | 0.02574800  | 2.68980700  |
| C | -5.45407100 | -0.98477600 | -1.14539900 |
| H | -3.43925500 | -1.20125000 | -1.80837700 |
| C | -6.28095600 | -0.66694800 | -0.02017200 |
| C | -6.61768200 | -0.02386500 | 2.34696500  |
| C | -4.70001900 | 0.33673200  | 3.79526200  |
| H | -2.75939600 | 0.05165000  | 2.82649200  |
| H | -5.92577300 | -1.23516800 | -2.08706800 |
| C | -6.05436000 | 0.31284400  | 3.62837700  |
| H | -7.69166900 | -0.04040000 | 2.21757700  |
| H | -4.26097200 | 0.58815000  | 4.75307100  |
| H | -6.72082300 | 0.54491400  | 4.45041500  |
| C | 0.87938500  | 3.86032100  | -1.54331100 |
| C | 0.29907900  | 5.13449400  | -1.65047900 |
| C | 2.21559800  | 3.70670200  | -1.94667000 |
| C | 1.02704100  | 6.21375800  | -2.14455300 |
| H | -0.72326700 | 5.28700600  | -1.32418000 |
| C | 2.94429400  | 4.78681300  | -2.43792900 |
| H | 2.68192600  | 2.72936100  | -1.89680300 |
| C | 2.35357000  | 6.04570100  | -2.54012700 |
| H | 0.55931200  | 7.18966900  | -2.21180400 |
| H | 3.97268300  | 4.64199500  | -2.74957600 |
| S | 0.76181900  | -0.41599300 | 1.48218700  |
| F | -7.62157400 | -0.69386800 | -0.20745900 |
| H | 2.26021300  | -9.05931100 | 2.18660100  |
| H | 2.92051300  | 6.88629300  | -2.92347300 |

T<sub>LE-Naph</sub> geometry (Å) (B3LYP/6-311G(d,p))

|   |             |             |             |
|---|-------------|-------------|-------------|
| C | -1.62981300 | -4.29606500 | 1.26369600  |
| C | -2.19145000 | -3.10447400 | 0.90631900  |
| C | -1.40484700 | -1.97207200 | 0.54992900  |
| C | 0.03740000  | -2.13884000 | 0.63865600  |
| C | 0.59054200  | -3.35994100 | 0.98567200  |
| C | -0.18526700 | -4.49305200 | 1.29019000  |
| C | 0.11957400  | 0.46786100  | -0.18892600 |
| C | -1.30674000 | 0.36549700  | -0.25434400 |
| C | -2.00565300 | 1.50956200  | -0.72336000 |
| H | -3.08269800 | 1.47673600  | -0.79843600 |
| C | -1.34950300 | 2.65291000  | -1.10246600 |
| C | 0.76693900  | 1.64099900  | -0.58515900 |
| H | -2.29006400 | -5.11914000 | 1.49810600  |
| H | -3.26903300 | -3.02550600 | 0.87928900  |
| H | 1.67057200  | -3.41573600 | 1.05420600  |
| H | -1.93560500 | 3.48191200  | -1.47777200 |
| H | 1.84672000  | 1.67776200  | -0.49563800 |

|   |             |             |             |
|---|-------------|-------------|-------------|
| N | -1.98660800 | -0.78457500 | 0.12228200  |
| C | 0.41075300  | -5.77238400 | 1.62894100  |
| C | -0.34551900 | -6.80410300 | 2.24736100  |
| C | 1.77667200  | -6.06252900 | 1.36321000  |
| C | 0.22714600  | -8.02360800 | 2.58372300  |
| H | -1.38647600 | -6.63861100 | 2.49324000  |
| C | 2.33993600  | -7.28250400 | 1.70091800  |
| H | 2.39577000  | -5.33042300 | 0.85941700  |
| C | 1.57408600  | -8.28040200 | 2.31699200  |
| H | -0.38332600 | -8.78129500 | 3.06370400  |
| H | 3.38462700  | -7.46614800 | 1.47313100  |
| C | 0.07414800  | 2.75509300  | -1.05415300 |
| C | -3.43566400 | -0.74937700 | 0.05732500  |
| C | -4.17487200 | -0.30318800 | 1.19018000  |
| C | -4.06120200 | -1.15070200 | -1.09664900 |
| C | -5.60323600 | -0.27672500 | 1.09760200  |
| C | -3.56955400 | 0.11465200  | 2.40363500  |
| C | -5.46874500 | -1.12720800 | -1.19405200 |
| H | -3.47015900 | -1.48625700 | -1.93952200 |
| C | -6.19367100 | -0.69906000 | -0.11733900 |
| C | -6.37268000 | 0.16241900  | 2.20486600  |
| C | -4.34032700 | 0.53501900  | 3.46140500  |
| H | -2.49071400 | 0.09856600  | 2.49048700  |
| H | -5.97257300 | -1.43925800 | -2.09928400 |
| C | -5.75097100 | 0.56027800  | 3.36307000  |
| H | -7.45148700 | 0.17765300  | 2.12093700  |
| H | -3.86340100 | 0.85064300  | 4.38181300  |
| H | -6.34131700 | 0.89513000  | 4.20761200  |
| C | 0.77468700  | 3.98142800  | -1.47591900 |
| C | 0.15577000  | 5.24293700  | -1.37363600 |
| C | 2.08436300  | 3.93839600  | -1.99386400 |
| C | 0.81728600  | 6.40318200  | -1.76327800 |
| H | -0.84255500 | 5.32072700  | -0.95986300 |
| C | 2.74415000  | 5.09951200  | -2.38078400 |
| H | 2.58124900  | 2.98377300  | -2.12088500 |
| C | 2.11597100  | 6.34104500  | -2.26869900 |
| H | 0.31837100  | 7.36094900  | -1.66435200 |
| H | 3.74908200  | 5.03394300  | -2.78301900 |
| S | 1.13044000  | -0.79250300 | 0.47340600  |
| F | -7.54366700 | -0.67144300 | -0.19948500 |
| H | 2.01704700  | -9.23463300 | 2.57672200  |
| H | 2.62992500  | 7.24522900  | -2.57366100 |

## S19 Coordinates of the optimized geometries of molecule 5

S<sub>0</sub> geometry (Å) (B3LYP/6-311G(d,p))

|   |             |             |             |
|---|-------------|-------------|-------------|
| N | -4.94538600 | 0.26004500  | 0.07570100  |
| N | 4.94547900  | 0.25983700  | -0.07582500 |
| O | -0.00064400 | -4.17885400 | 0.00005300  |
| O | 0.00014400  | 4.31651700  | 0.00022000  |
| C | 0.02019000  | -2.18293300 | 1.26947300  |
| C | 0.03992500  | -2.90120100 | 2.47826900  |
| H | 0.03949100  | -3.98255500 | 2.42266800  |

|   |             |             |             |
|---|-------------|-------------|-------------|
| C | 0.05872600  | -2.23950100 | 3.69211100  |
| H | 0.07382700  | -2.79789300 | 4.62089300  |
| C | 0.05798300  | -0.83995900 | 3.70928200  |
| C | 0.03896000  | -0.12492200 | 2.52126800  |
| H | 0.03875400  | 0.95824600  | 2.54880700  |
| C | 0.01992900  | -0.78180600 | 1.28325800  |
| C | 0.00004800  | 0.06304700  | 0.00003200  |
| C | -0.01990500 | -0.78181100 | -1.28317700 |
| C | -0.02061400 | -2.18293000 | -1.26938700 |
| C | -0.00037000 | -2.95442800 | 0.00004900  |
| C | -0.04049300 | -2.90121400 | -2.47817600 |
| H | -0.04039600 | -3.98256500 | -2.42254500 |
| C | -0.05900000 | -2.23952500 | -3.69202200 |
| H | -0.07421200 | -2.79791300 | -4.62080600 |
| C | -0.05780100 | -0.83997800 | -3.70920700 |
| C | -0.03863100 | -0.12493400 | -2.52120700 |
| H | -0.03805700 | 0.95823400  | -2.54875400 |
| C | -1.28962900 | 0.91272400  | 0.01919400  |
| C | -2.51136000 | 0.24640800  | 0.04175500  |
| H | -2.50265700 | -0.83364600 | 0.06062800  |
| C | -3.74524800 | 0.93308100  | 0.06007000  |
| C | -3.69043900 | 2.35345200  | 0.05995000  |
| H | -4.59868700 | 2.93894200  | 0.05671700  |
| C | -2.47953200 | 3.00684400  | 0.04365600  |
| H | -2.44110900 | 4.08943100  | 0.03879500  |
| C | -1.25643900 | 2.31448500  | 0.02159700  |
| C | 0.00010900  | 3.08487200  | 0.00012200  |
| C | 1.25662100  | 2.31442100  | -0.02146900 |
| C | 1.28974200  | 0.91266700  | -0.01912700 |
| C | 2.51144500  | 0.24628700  | -0.04174400 |
| H | 2.50267700  | -0.83376600 | -0.06064000 |
| C | 3.74536000  | 0.93290500  | -0.06009400 |
| C | 3.69061700  | 2.35328000  | -0.05993600 |
| H | 4.59890500  | 2.93871500  | -0.05673600 |
| C | 2.47974900  | 3.00673100  | -0.04355300 |
| H | 2.44136600  | 4.08932000  | -0.03862300 |
| C | -5.01791900 | -1.19706500 | -0.04016400 |
| H | -5.97114500 | -1.43775700 | -0.51831100 |
| H | -4.24465600 | -1.54456600 | -0.72868100 |
| C | -4.91469400 | -1.93390900 | 1.30037100  |
| H | -3.96370800 | -1.72814400 | 1.79568800  |
| H | -4.99252300 | -3.01388000 | 1.14597200  |
| H | -5.71886800 | -1.62983200 | 1.97571000  |
| C | -6.22274600 | 0.96054900  | 0.21284000  |
| H | -6.91483000 | 0.27899100  | 0.71451100  |
| H | -6.10063100 | 1.80970900  | 0.88864800  |
| C | -6.82760600 | 1.41741200  | -1.11983400 |
| H | -6.16794500 | 2.11811800  | -1.63594500 |
| H | -7.78853100 | 1.91212100  | -0.95107700 |
| H | -6.99797800 | 0.56562600  | -1.78345200 |
| C | 5.01798200  | -1.19726500 | 0.04009700  |
| H | 5.97128700  | -1.43796200 | 0.51808300  |
| H | 4.24482600  | -1.54471600 | 0.72876800  |
| C | 4.91451500  | -1.93418700 | -1.30038700 |

|   |             |             |             |
|---|-------------|-------------|-------------|
| H | 3.96378200  | -1.72779200 | -1.79592000 |
| H | 4.99154600  | -3.01419300 | -1.14584300 |
| H | 5.71905200  | -1.63076800 | -1.97559400 |
| C | 6.22283400  | 0.96029200  | -0.21318900 |
| H | 6.10059400  | 1.80951800  | -0.88887900 |
| H | 6.91478200  | 0.27876700  | -0.71510300 |
| C | 6.82802700  | 1.41701300  | 1.11938000  |
| H | 6.16875400  | 2.11809900  | 1.63547600  |
| H | 7.78917700  | 1.91123700  | 0.95048300  |
| H | 6.99804400  | 0.56522300  | 1.78308400  |
| H | 0.07251200  | -0.30811000 | 4.65404700  |
| H | -0.07210400 | -0.30813700 | -4.65398100 |

S<sub>CT</sub> geometry (Å) (B3LYP/6-311G(d,p))

|   |             |             |             |
|---|-------------|-------------|-------------|
| N | -5.01067100 | 0.05067000  | 0.08498200  |
| N | 4.80229500  | 0.49836400  | -0.05979600 |
| O | 1.30641300  | -3.99272500 | -0.04673200 |
| O | -0.26114100 | 4.31173500  | -0.00594300 |
| C | 0.46346800  | -2.15752100 | 1.22026700  |
| C | 0.61467100  | -2.86338200 | 2.43953000  |
| H | 0.97592700  | -3.88212800 | 2.37206200  |
| C | 0.30680200  | -2.28092000 | 3.65659500  |
| H | 0.42981400  | -2.84943200 | 4.57332000  |
| C | -0.16658500 | -0.96508900 | 3.70819800  |
| C | -0.31603300 | -0.25321400 | 2.51453500  |
| H | -0.67640300 | 0.76934300  | 2.55678400  |
| C | -0.00970200 | -0.82296700 | 1.28080100  |
| C | -0.09422100 | 0.04458700  | -0.00223900 |
| C | -0.04544100 | -0.80712400 | -1.29803800 |
| C | 0.42933000  | -2.14200900 | -1.26673300 |
| C | 0.79000800  | -2.83279300 | -0.03221600 |
| C | 0.54563100  | -2.83325000 | -2.49809600 |
| H | 0.90852700  | -3.85253600 | -2.45283400 |
| C | 0.20256900  | -2.23666500 | -3.69900900 |
| H | 0.29893600  | -2.79444500 | -4.62545900 |
| C | -0.27277900 | -0.92087100 | -3.72122100 |
| C | -0.38770900 | -0.22323800 | -2.51563700 |
| H | -0.75036600 | 0.79914000  | -2.53569100 |
| C | -1.39993700 | 0.84603600  | 0.01911000  |
| C | -2.58820900 | 0.13553700  | 0.04090700  |
| H | -2.52672000 | -0.94166000 | 0.05463700  |
| C | -3.85255000 | 0.77228800  | 0.06592900  |
| C | -3.86961200 | 2.20157000  | 0.06807500  |
| H | -4.80480600 | 2.74185900  | 0.06934900  |
| C | -2.69418700 | 2.90344600  | 0.04626000  |
| H | -2.70002200 | 3.98633100  | 0.04034000  |
| C | -1.43870600 | 2.25544800  | 0.02188100  |
| C | -0.23123000 | 3.08264000  | -0.00264600 |
| C | 1.06565600  | 2.35862300  | -0.02255900 |
| C | 1.14413000  | 0.95367400  | -0.01512000 |
| C | 2.39491200  | 0.36016600  | -0.02593000 |
| H | 2.44531200  | -0.71582000 | -0.03297400 |
| C | 3.59354400  | 1.12021800  | -0.05085000 |

|   |             |             |             |
|---|-------------|-------------|-------------|
| C | 3.48839200  | 2.54825400  | -0.06444300 |
| H | 4.37043800  | 3.17072900  | -0.06850300 |
| C | 2.25165600  | 3.13050600  | -0.04661800 |
| H | 2.14323000  | 4.20743800  | -0.04565500 |
| C | -5.01941300 | -1.41569300 | -0.01482100 |
| H | -5.96126300 | -1.69480700 | -0.49248400 |
| H | -4.22817400 | -1.73441500 | -0.69349000 |
| C | -4.89202800 | -2.11871400 | 1.34036800  |
| H | -3.94728300 | -1.87458000 | 1.82902600  |
| H | -4.93230900 | -3.20167300 | 1.20017500  |
| H | -5.70750300 | -1.83231500 | 2.00957500  |
| C | -6.32650000 | 0.68599600  | 0.21965400  |
| H | -6.97441000 | -0.02978200 | 0.73024400  |
| H | -6.24603700 | 1.54767700  | 0.88344200  |
| C | -6.95057500 | 1.08733200  | -1.12116600 |
| H | -6.33335400 | 1.82152000  | -1.64283200 |
| H | -7.93919200 | 1.52383100  | -0.95646600 |
| H | -7.06798800 | 0.21942800  | -1.77439300 |
| C | 4.93849100  | -0.96679400 | 0.05756600  |
| H | 5.90109000  | -1.14848200 | 0.53818900  |
| H | 4.17417100  | -1.34480200 | 0.73330700  |
| C | 4.87783800  | -1.68316600 | -1.29518000 |
| H | 3.91548600  | -1.52991100 | -1.78474000 |
| H | 5.00423400  | -2.75518500 | -1.13457200 |
| H | 5.66986900  | -1.33776100 | -1.96393600 |
| C | 6.06645000  | 1.23923100  | -0.18845900 |
| H | 5.91535100  | 2.09502400  | -0.84480200 |
| H | 6.76677900  | 0.57489200  | -0.69698800 |
| C | 6.64053700  | 1.67373700  | 1.16444300  |
| H | 5.96545200  | 2.35805300  | 1.68124500  |
| H | 7.59445800  | 2.18177700  | 1.00718800  |
| H | 6.81661800  | 0.81329300  | 1.81310000  |
| H | -0.41046900 | -0.49805400 | 4.65519900  |
| H | -0.54494800 | -0.44313900 | -4.65509100 |

T<sub>CT</sub> geometry (Å) (B3LYP/6-311G(d,p))

|   |             |             |             |
|---|-------------|-------------|-------------|
| N | -4.90575700 | 0.31121600  | 0.07315400  |
| N | 4.94209500  | 0.22919900  | -0.07608700 |
| O | -0.21443400 | -4.21599700 | 0.00258600  |
| O | 0.05268200  | 4.32657100  | 0.00431800  |
| C | -0.06703900 | -2.20157000 | 1.25167300  |
| C | -0.07211800 | -2.91456400 | 2.47834600  |
| H | -0.13812100 | -3.99458500 | 2.43527500  |
| C | 0.00318400  | -2.25277900 | 3.68982700  |
| H | -0.00678700 | -2.81955500 | 4.61506100  |
| C | 0.09157200  | -0.85603100 | 3.72299100  |
| C | 0.09935000  | -0.14562800 | 2.52356000  |
| H | 0.17080200  | 0.93677300  | 2.55153700  |
| C | 0.02167400  | -0.78920900 | 1.28881900  |
| C | 0.01700600  | 0.06429500  | 0.00105000  |
| C | -0.01505100 | -0.78807300 | -1.28702500 |
| C | -0.10289600 | -2.20055900 | -1.24879600 |
| C | -0.14494200 | -2.92902000 | 0.00193300  |



|   |             |             |             |
|---|-------------|-------------|-------------|
| C | -0.14296500 | -2.91225800 | -2.47561100 |
| H | -0.20788200 | -3.99227200 | -2.43185500 |
| C | -0.10184400 | -2.24931500 | -3.68804800 |
| H | -0.13816000 | -2.81517200 | -4.61318700 |
| C | -0.01461000 | -0.85250100 | -3.72234200 |
| C | 0.02729000  | -0.14329100 | -2.52286400 |
| H | 0.09766800  | 0.93915800  | -2.55180400 |
| C | -1.25550100 | 0.92828100  | 0.01902200  |
| C | -2.48024400 | 0.27465400  | 0.03814900  |
| H | -2.47716400 | -0.80483800 | 0.05322200  |
| C | -3.70947500 | 0.97628800  | 0.05880400  |
| C | -3.65184600 | 2.40160400  | 0.06247500  |
| H | -4.55726300 | 2.99067100  | 0.06141500  |
| C | -2.43885900 | 3.04197900  | 0.04537700  |
| H | -2.38753500 | 4.12375200  | 0.04154000  |
| C | -1.21987500 | 2.33255200  | 0.02319400  |
| C | 0.04071500  | 3.09588200  | 0.00333600  |
| C | 1.28911500  | 2.31034200  | -0.01820700 |
| C | 1.30223100  | 0.90469500  | -0.01640500 |
| C | 2.51557900  | 0.23088600  | -0.03787500 |
| H | 2.49300900  | -0.84846700 | -0.05466100 |
| C | 3.75548000  | 0.91144100  | -0.05914700 |
| C | 3.72081000  | 2.33831000  | -0.05994600 |
| H | 4.63611500  | 2.91198400  | -0.05894800 |
| C | 2.51927800  | 2.99976100  | -0.04026800 |
| H | 2.48619400  | 4.08220300  | -0.03434200 |
| C | -4.98819100 | -1.15085400 | -0.03453400 |
| H | -5.94209200 | -1.38082300 | -0.51475000 |
| H | -4.21251400 | -1.50644800 | -0.71341800 |
| C | -4.89874200 | -1.86883500 | 1.31662200  |
| H | -3.94406500 | -1.67467800 | 1.80836800  |
| H | -4.99203700 | -2.94763200 | 1.16880000  |
| H | -5.70017000 | -1.54662500 | 1.98637200  |
| C | -6.18630800 | 1.01416400  | 0.20181500  |
| H | -6.87559000 | 0.33282900  | 0.70570900  |
| H | -6.06371000 | 1.86899900  | 0.86822100  |
| C | -6.77979300 | 1.45262100  | -1.14180500 |
| H | -6.11986600 | 2.15263700  | -1.65789500 |
| H | -7.74380100 | 1.94264500  | -0.98143300 |
| H | -6.94118000 | 0.59386700  | -1.79779400 |
| C | 5.00161100  | -1.23389400 | 0.02824200  |
| H | 5.95284600  | -1.48049500 | 0.50550300  |
| H | 4.22194800  | -1.57819200 | 0.70855700  |
| C | 4.89705400  | -1.94766500 | -1.32411500 |
| H | 3.94535500  | -1.73523800 | -1.81416000 |
| H | 4.97170400  | -3.02834600 | -1.17906700 |
| H | 5.70296300  | -1.63830100 | -1.99454600 |
| C | 6.23306300  | 0.91235000  | -0.20769600 |
| H | 6.12218300  | 1.76954100  | -0.87313800 |
| H | 6.91011100  | 0.22100000  | -0.71459500 |
| C | 6.83802200  | 1.34023100  | 1.13415700  |
| H | 6.19106500  | 2.05024800  | 1.65308700  |
| H | 7.80919500  | 1.81503000  | 0.97109600  |
| H | 6.98792100  | 0.47852600  | 1.78904500  |

|   |            |             |             |
|---|------------|-------------|-------------|
| H | 0.15269200 | -0.32797300 | 4.66745800  |
| H | 0.01940200 | -0.32346800 | -4.66763000 |

**S20** Frequencies of all geometries of molecule 5 computed at (B3LYP/6-311G(d,p)) level of theory

| molecule-3     |                   |                   |
|----------------|-------------------|-------------------|
| $\omega_{S_0}$ | $\omega_{S_{CT}}$ | $\omega_{T_{CT}}$ |
| 11.11          | 14.76             | 10.52             |
| 21.63          | 25.21             | 12.58             |
| 29.42          | 25.94             | 28.70             |
| 29.94          | 31.69             | 29.15             |
| 35.18          | 36.08             | 35.76             |
| 56.08          | 53.84             | 56.08             |
| 56.99          | 56.94             | 56.57             |
| 57.97          | 62.22             | 61.71             |
| 61.75          | 65.73             | 63.96             |
| 75.78          | 75.10             | 75.59             |
| 84.56          | 84.64             | 85.51             |
| 87.90          | 89.31             | 87.70             |
| 100.00         | 104.49            | 105.19            |
| 114.30         | 114.66            | 114.21            |
| 115.03         | 120.35            | 118.26            |
| 119.56         | 127.69            | 125.72            |
| 125.31         | 135.51            | 127.73            |
| 129.69         | 148.26            | 140.86            |
| 169.35         | 165.40            | 168.10            |
| 181.89         | 185.63            | 181.53            |
| 202.23         | 197.04            | 202.03            |
| 215.80         | 209.24            | 214.49            |
| 217.02         | 215.16            | 216.85            |
| 218.03         | 219.45            | 218.76            |
| 221.43         | 219.57            | 222.30            |
| 237.63         | 239.03            | 236.67            |
| 241.93         | 241.80            | 237.08            |
| 260.18         | 259.51            | 258.69            |
| 270.76         | 276.61            | 273.06            |
| 281.50         | 281.11            | 276.97            |
| 287.68         | 287.65            | 284.65            |

| molecule-3     |                   |                   |
|----------------|-------------------|-------------------|
| $\omega_{S_0}$ | $\omega_{S_{CT}}$ | $\omega_{T_{CT}}$ |
| 295.90         | 288.70            | 291.84            |
| 307.18         | 310.66            | 308.70            |
| 341.21         | 322.72            | 320.12            |
| 343.17         | 341.42            | 341.86            |
| 343.53         | 343.62            | 342.16            |
| 350.28         | 345.69            | 346.53            |
| 370.33         | 369.36            | 372.25            |
| 377.28         | 383.23            | 377.35            |
| 414.67         | 395.77            | 383.44            |
| 424.85         | 427.66            | 424.08            |
| 426.98         | 431.14            | 430.42            |
| 427.37         | 440.68            | 434.78            |
| 460.21         | 452.28            | 453.51            |
| 461.59         | 466.80            | 460.80            |
| 469.94         | 474.52            | 473.21            |
| 481.99         | 485.58            | 482.87            |
| 484.10         | 486.58            | 483.53            |
| 507.42         | 513.72            | 504.94            |
| 527.91         | 535.51            | 528.47            |
| 540.81         | 545.38            | 537.47            |
| 545.30         | 555.04            | 547.85            |
| 559.36         | 566.01            | 550.78            |
| 582.04         | 579.48            | 575.26            |
| 584.11         | 582.02            | 577.34            |
| 586.10         | 590.17            | 586.32            |
| 642.56         | 626.34            | 587.65            |
| 644.66         | 636.70            | 631.97            |
| 645.50         | 641.12            | 634.14            |
| 654.33         | 648.99            | 647.44            |
| 680.46         | 649.89            | 649.30            |
| 682.38         | 666.59            | 672.76            |
| 697.33         | 676.89            | 676.43            |
| 711.03         | 698.12            | 696.35            |
| 712.40         | 707.01            | 708.25            |
| 725.66         | 712.80            | 712.14            |
| 744.63         | 741.85            | 739.47            |
| 751.65         | 744.88            | 744.06            |
| 774.03         | 747.21            | 748.47            |
| 782.62         | 757.15            | 759.56            |
| 787.08         | 772.55            | 770.21            |
| 788.69         | 780.72            | 770.74            |
| 793.32         | 788.58            | 785.56            |
| 795.43         | 794.57            | 793.02            |

| molecule-3     |                   |                   |
|----------------|-------------------|-------------------|
| $\omega_{S_0}$ | $\omega_{S_{CT}}$ | $\omega_{T_{CT}}$ |
| 797.06         | 798.81            | 798.23            |
| 801.10         | 804.07            | 799.21            |
| 821.46         | 808.49            | 802.96            |
| 831.47         | 824.69            | 817.45            |
| 841.32         | 828.12            | 827.15            |
| 852.28         | 852.00            | 849.26            |
| 855.70         | 872.43            | 864.00            |
| 863.63         | 875.29            | 866.07            |
| 889.03         | 882.39            | 867.76            |
| 903.64         | 887.81            | 879.48            |
| 916.89         | 900.39            | 896.83            |
| 917.57         | 900.66            | 912.67            |
| 928.35         | 914.80            | 921.94            |
| 930.27         | 930.30            | 925.14            |
| 941.70         | 931.40            | 932.03            |
| 944.09         | 932.71            | 932.32            |
| 946.20         | 932.95            | 940.50            |
| 953.09         | 936.73            | 941.61            |
| 991.49         | 947.20            | 944.64            |
| 991.84         | 950.93            | 948.43            |
| 998.84         | 987.78            | 981.60            |
| 1000.02        | 990.75            | 982.11            |
| 1001.89        | 996.70            | 997.50            |
| 1014.89        | 1006.23           | 1002.96           |
| 1015.47        | 1012.74           | 1005.59           |
| 1021.86        | 1015.27           | 1016.15           |
| 1038.48        | 1029.56           | 1032.55           |
| 1058.13        | 1049.31           | 1047.46           |
| 1067.28        | 1053.89           | 1059.84           |
| 1085.34        | 1071.94           | 1080.99           |
| 1085.35        | 1076.30           | 1081.22           |
| 1094.85        | 1082.04           | 1086.23           |
| 1094.98        | 1089.40           | 1087.58           |
| 1104.16        | 1098.58           | 1098.64           |
| 1112.28        | 1101.91           | 1103.64           |
| 1112.44        | 1108.80           | 1110.47           |
| 1112.85        | 1111.46           | 1110.84           |

| molecule-3     |                   |                   |
|----------------|-------------------|-------------------|
| $\omega_{S_0}$ | $\omega_{S_{CT}}$ | $\omega_{T_{CT}}$ |
| 1121.77        | 1119.53           | 1124.26           |
| 1135.01        | 1123.30           | 1128.19           |
| 1171.05        | 1130.28           | 1157.38           |
| 1172.05        | 1155.64           | 1157.90           |
| 1175.32        | 1167.22           | 1167.10           |
| 1180.87        | 1173.17           | 1174.01           |
| 1190.38        | 1175.21           | 1174.19           |
| 1192.72        | 1177.06           | 1175.97           |
| 1195.81        | 1187.96           | 1185.40           |
| 1202.57        | 1198.88           | 1195.58           |
| 1218.12        | 1200.32           | 1205.41           |
| 1218.29        | 1210.28           | 1209.86           |
| 1219.59        | 1212.65           | 1212.50           |
| 1231.41        | 1221.78           | 1227.91           |
| 1268.56        | 1256.84           | 1272.68           |
| 1283.55        | 1260.59           | 1273.57           |
| 1294.02        | 1278.78           | 1279.65           |
| 1299.94        | 1279.50           | 1289.71           |
| 1302.90        | 1288.02           | 1291.33           |
| 1314.16        | 1291.13           | 1295.32           |
| 1316.67        | 1315.05           | 1314.95           |
| 1319.69        | 1317.29           | 1315.95           |
| 1330.96        | 1320.75           | 1317.79           |
| 1340.24        | 1322.90           | 1323.43           |
| 1343.52        | 1327.94           | 1324.52           |
| 1353.64        | 1335.10           | 1333.46           |
| 1358.07        | 1362.07           | 1343.36           |
| 1364.23        | 1370.43           | 1360.71           |
| 1381.47        | 1373.05           | 1368.75           |
| 1382.64        | 1378.44           | 1377.69           |
| 1394.32        | 1381.12           | 1379.57           |
| 1395.36        | 1387.41           | 1385.46           |
| 1408.53        | 1410.06           | 1390.29           |
| 1408.56        | 1412.13           | 1408.75           |
| 1411.18        | 1412.57           | 1409.05           |
| 1411.22        | 1414.30           | 1411.51           |
| 1429.87        | 1422.50           | 1412.07           |
| 1434.77        | 1434.58           | 1428.87           |
| 1466.45        | 1437.75           | 1432.29           |
| 1467.09        | 1455.72           | 1445.42           |
| 1475.71        | 1466.58           | 1462.30           |
| 1479.05        | 1477.35           | 1463.33           |

| molecule-3     |                   |                   |
|----------------|-------------------|-------------------|
| $\omega_{S_0}$ | $\omega_{S_{CT}}$ | $\omega_{T_{CT}}$ |
| 1489.22        | 1485.70           | 1469.84           |
| 1489.23        | 1485.82           | 1485.17           |
| 1490.79        | 1488.30           | 1488.81           |
| 1490.87        | 1489.34           | 1489.19           |
| 1493.10        | 1489.72           | 1490.21           |
| 1493.43        | 1490.64           | 1490.41           |
| 1498.94        | 1493.10           | 1492.93           |
| 1499.07        | 1493.52           | 1493.28           |
| 1505.12        | 1497.94           | 1498.56           |
| 1511.63        | 1498.44           | 1498.68           |
| 1511.78        | 1513.55           | 1509.23           |
| 1514.66        | 1515.48           | 1512.98           |
| 1525.56        | 1516.41           | 1513.75           |
| 1526.65        | 1525.13           | 1522.72           |
| 1543.24        | 1531.64           | 1527.42           |
| 1548.11        | 1538.91           | 1537.23           |
| 1574.72        | 1541.27           | 1538.88           |
| 1582.69        | 1546.01           | 1551.50           |
| 1602.91        | 1554.92           | 1557.24           |
| 1620.18        | 1560.90           | 1564.41           |
| 1631.42        | 1585.61           | 1578.63           |
| 1638.45        | 1587.06           | 1598.62           |
| 1640.00        | 1614.42           | 1621.62           |
| 1640.32        | 1628.43           | 1625.04           |
| 1688.32        | 1636.77           | 1626.02           |
| 1712.85        | 1688.94           | 1685.05           |
| 3029.52        | 3034.72           | 3034.40           |
| 3029.55        | 3035.60           | 3034.78           |
| 3030.18        | 3042.64           | 3035.19           |
| 3030.21        | 3043.40           | 3035.47           |
| 3039.25        | 3055.80           | 3052.59           |
| 3039.27        | 3061.52           | 3052.89           |
| 3048.00        | 3072.61           | 3059.14           |
| 3048.16        | 3078.39           | 3059.71           |
| 3073.65        | 3090.35           | 3088.68           |
| 3073.65        | 3093.27           | 3089.12           |

| molecule-3     |                   |                   |
|----------------|-------------------|-------------------|
| $\omega_{S_0}$ | $\omega_{S_{CT}}$ | $\omega_{T_{CT}}$ |
| 3076.24        | 3103.90           | 3090.95           |
| 3076.25        | 3107.23           | 3091.70           |
| 3094.30        | 3108.39           | 3103.10           |
| 3094.32        | 3109.68           | 3103.37           |
| 3094.81        | 3114.08           | 3105.52           |
| 3094.85        | 3116.34           | 3106.29           |
| 3107.01        | 3119.24           | 3113.84           |
| 3107.03        | 3126.60           | 3114.29           |
| 3109.15        | 3129.31           | 3117.72           |
| 3109.23        | 3138.07           | 3118.31           |
| 3167.63        | 3148.19           | 3154.75           |
| 3167.69        | 3148.70           | 3154.79           |
| 3180.49        | 3157.28           | 3161.35           |
| 3180.65        | 3157.91           | 3161.55           |
| 3189.96        | 3179.99           | 3181.99           |
| 3190.35        | 3180.33           | 3182.08           |
| 3191.17        | 3191.31           | 3193.26           |
| 3191.37        | 3192.21           | 3193.54           |
| 3201.60        | 3195.98           | 3195.78           |
| 3202.03        | 3204.68           | 3196.00           |
| 3210.56        | 3220.31           | 3217.66           |
| 3211.01        | 3227.03           | 3218.00           |
| 3212.00        | 3230.60           | 3220.26           |
| 3212.31        | 3249.25           | 3221.29           |



## Notes and references

- [1] F. Plasser, *J. Chem. Phys.*, 2020, **152**, 084108.
- [2] T. Lu and F. Chen, *Journal of Computational Chemistry*, 2012, **33**, 580–592.
- [3] Z. Liu, T. Lu and Q. Chen, *Carbon*, 2020, **165**, 461–467.
- [4] M. Etinski, V. Rai-Constapel and C. M. Marian, *J. Chem. Phys.*, 2014, **140**, 114104.
- [5] P. Karak, K. Ruud and S. Chakrabarti, *J. Phys. Chem. Lett.*, 2021, **12**, 9768–9773.
- [6] S. M. Sartor, B. G. McCarthy, R. M. Pearson, G. M. Miyake and N. H. Damrauer, *J. Am. Chem. Soc.*, 2018, **140**, 4778–4781.
- [7] H. Kim and G. D. Scholes, *Phys. Chem. Chem. Phys.*, 2020, **22**, 13292–13298.
- [8] S. M. Sartor, C. H. Chrisman, R. M. Pearson, G. M. Miyake and N. H. Damrauer, *J. Phys. Chem. A*, 2020, **124**, 817–823.
- [9] P. Karak and S. Chakrabarti, *Phys. Chem. Chem. Phys.*, 2020, **22**, 24399–24409.
- [10] E. Mihajlo, *J. Serb. Chem. Soc.*, 2011, **76**, 1649–1660.
- [11] P. Karak, K. Ruud and S. Chakrabarti, *J. Chem. Phys.*, 2022, **157**, 174101.
- [12] P. Karak, T. Moitra, K. Ruud and S. Chakrabarti, *Phys. Chem. Chem. Phys.*, 2023, **25**, 8209–8219.
